# Supplementary material
Source: Research Square preprint supplement (doi:10.21203/rs.3.rs-8838536/v1)
Supplement: Supplementary file 1 [file 5f8ba49e140cb428476571bf.docx]

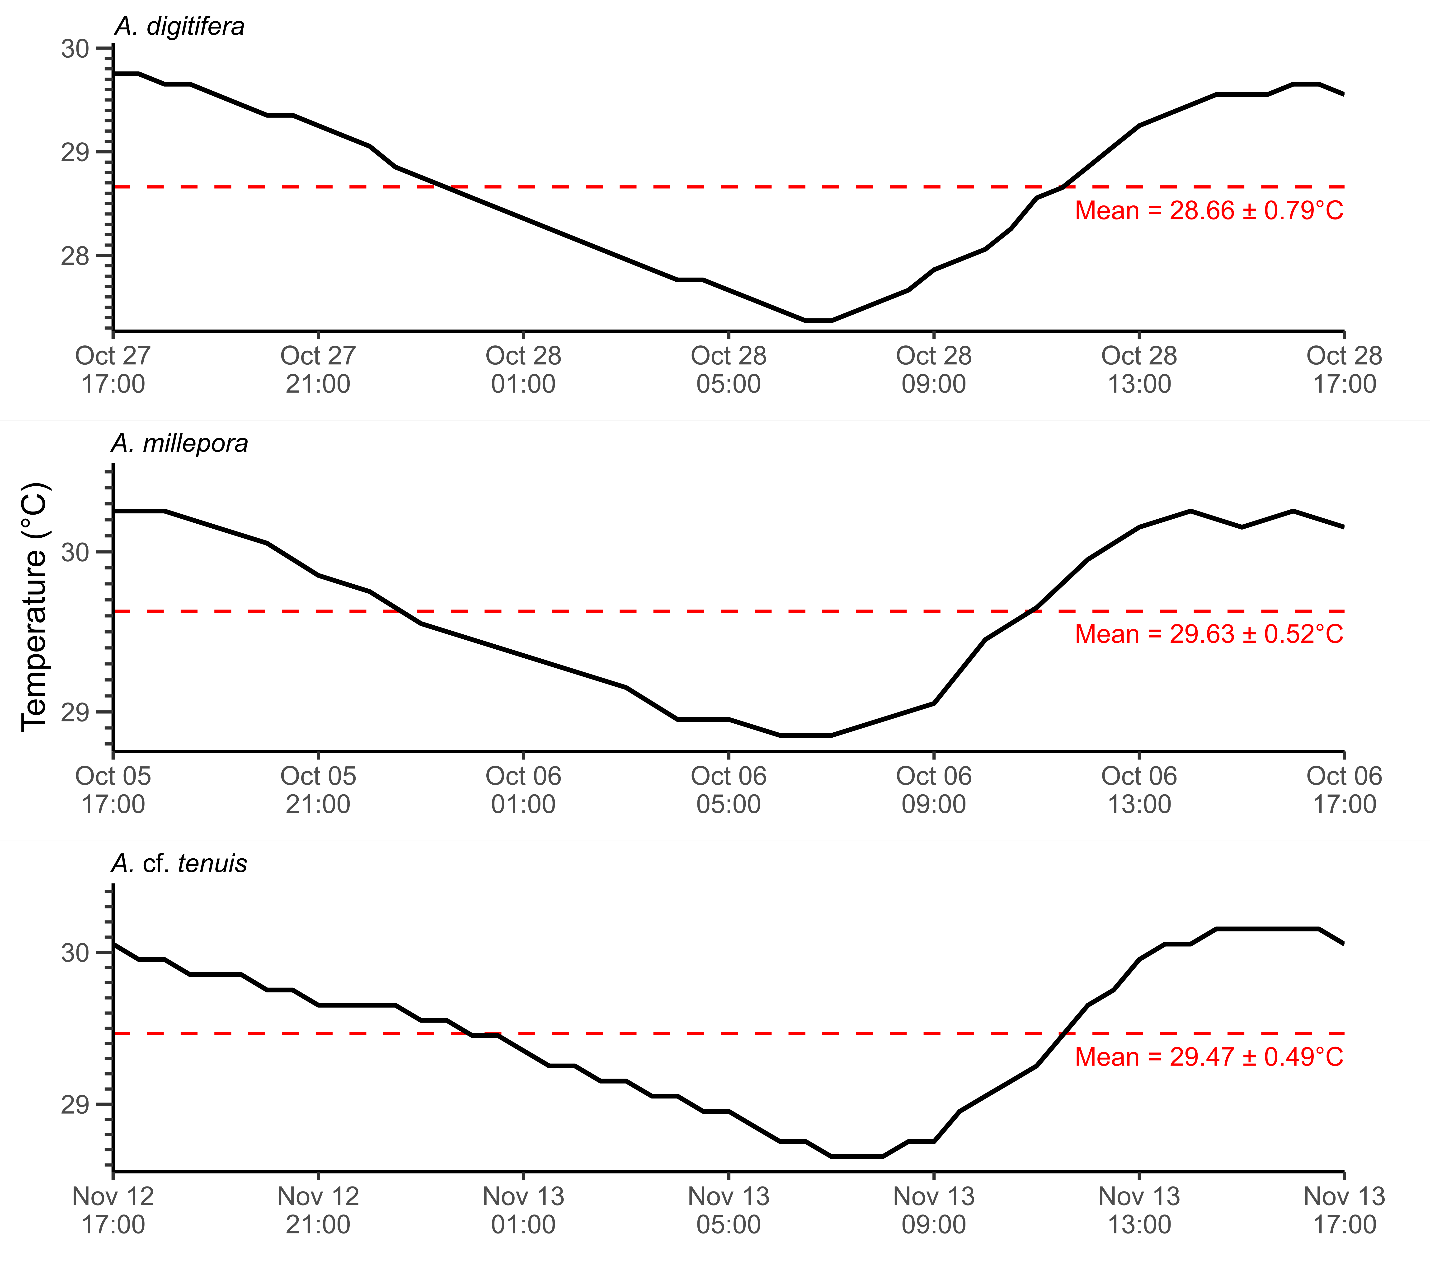


**Fig. S1** Temperature inflow-through seawater tanks (°C). Black solid lines represent temperature through a one-day holding period prior to preparation of coral fragments. Horizontal dashed line represents mean temperature and standard deviation.


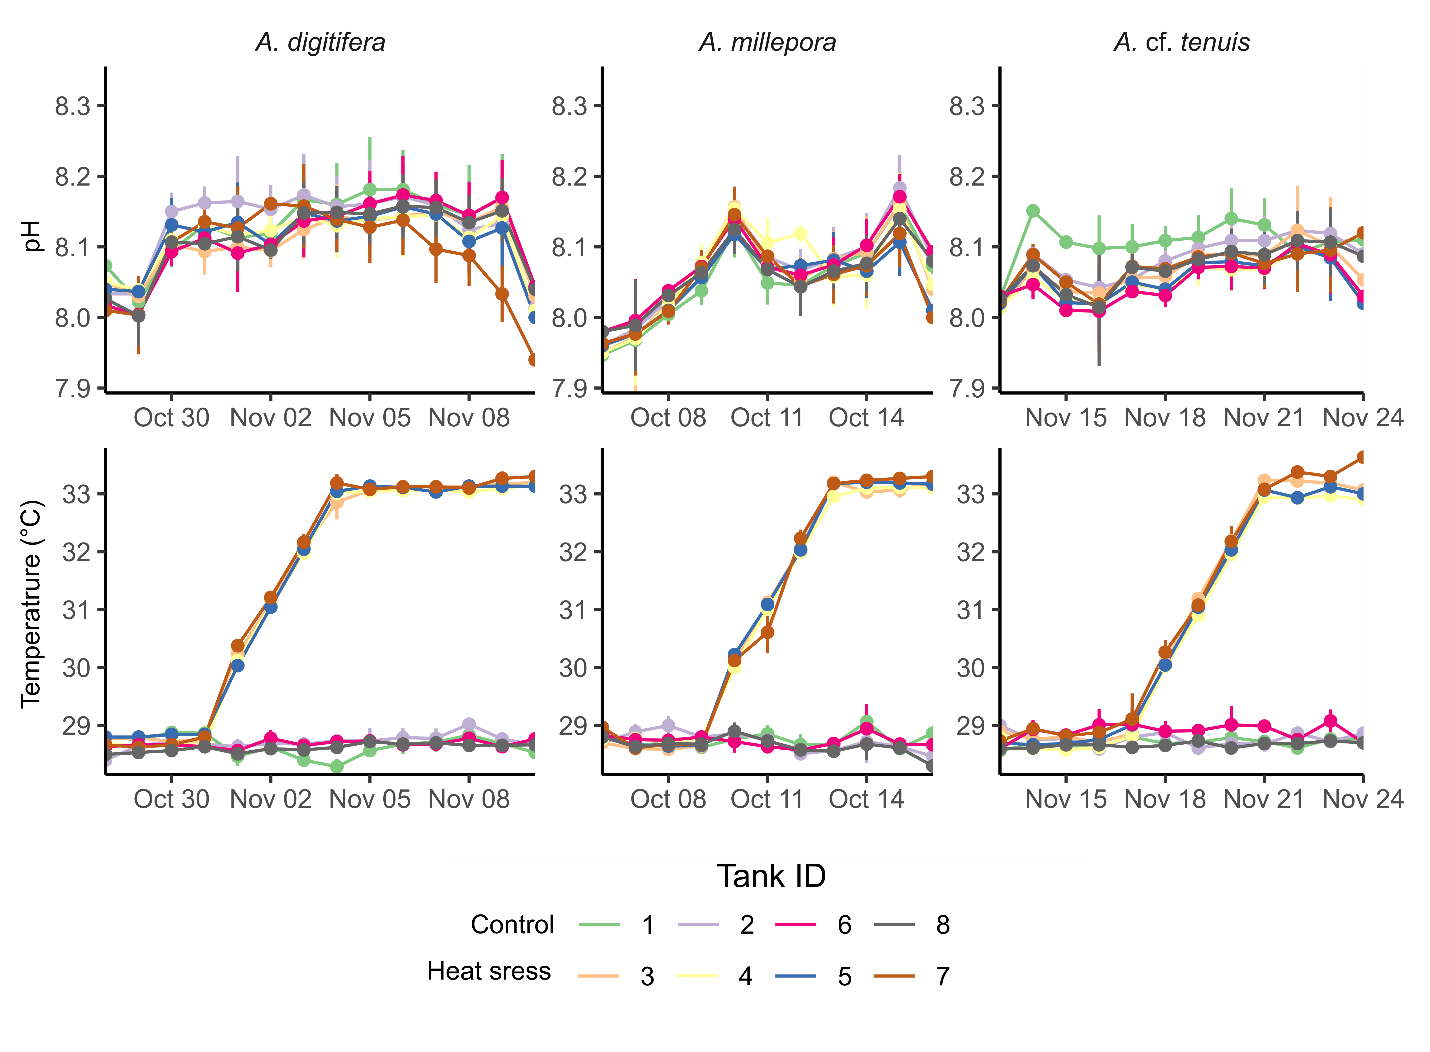


**Fig. S2** pH and temperature (°C) in experimental tanks. Mean values (± standard deviation) recorded for each experimental run are shown. Colors correspond to tank IDs.


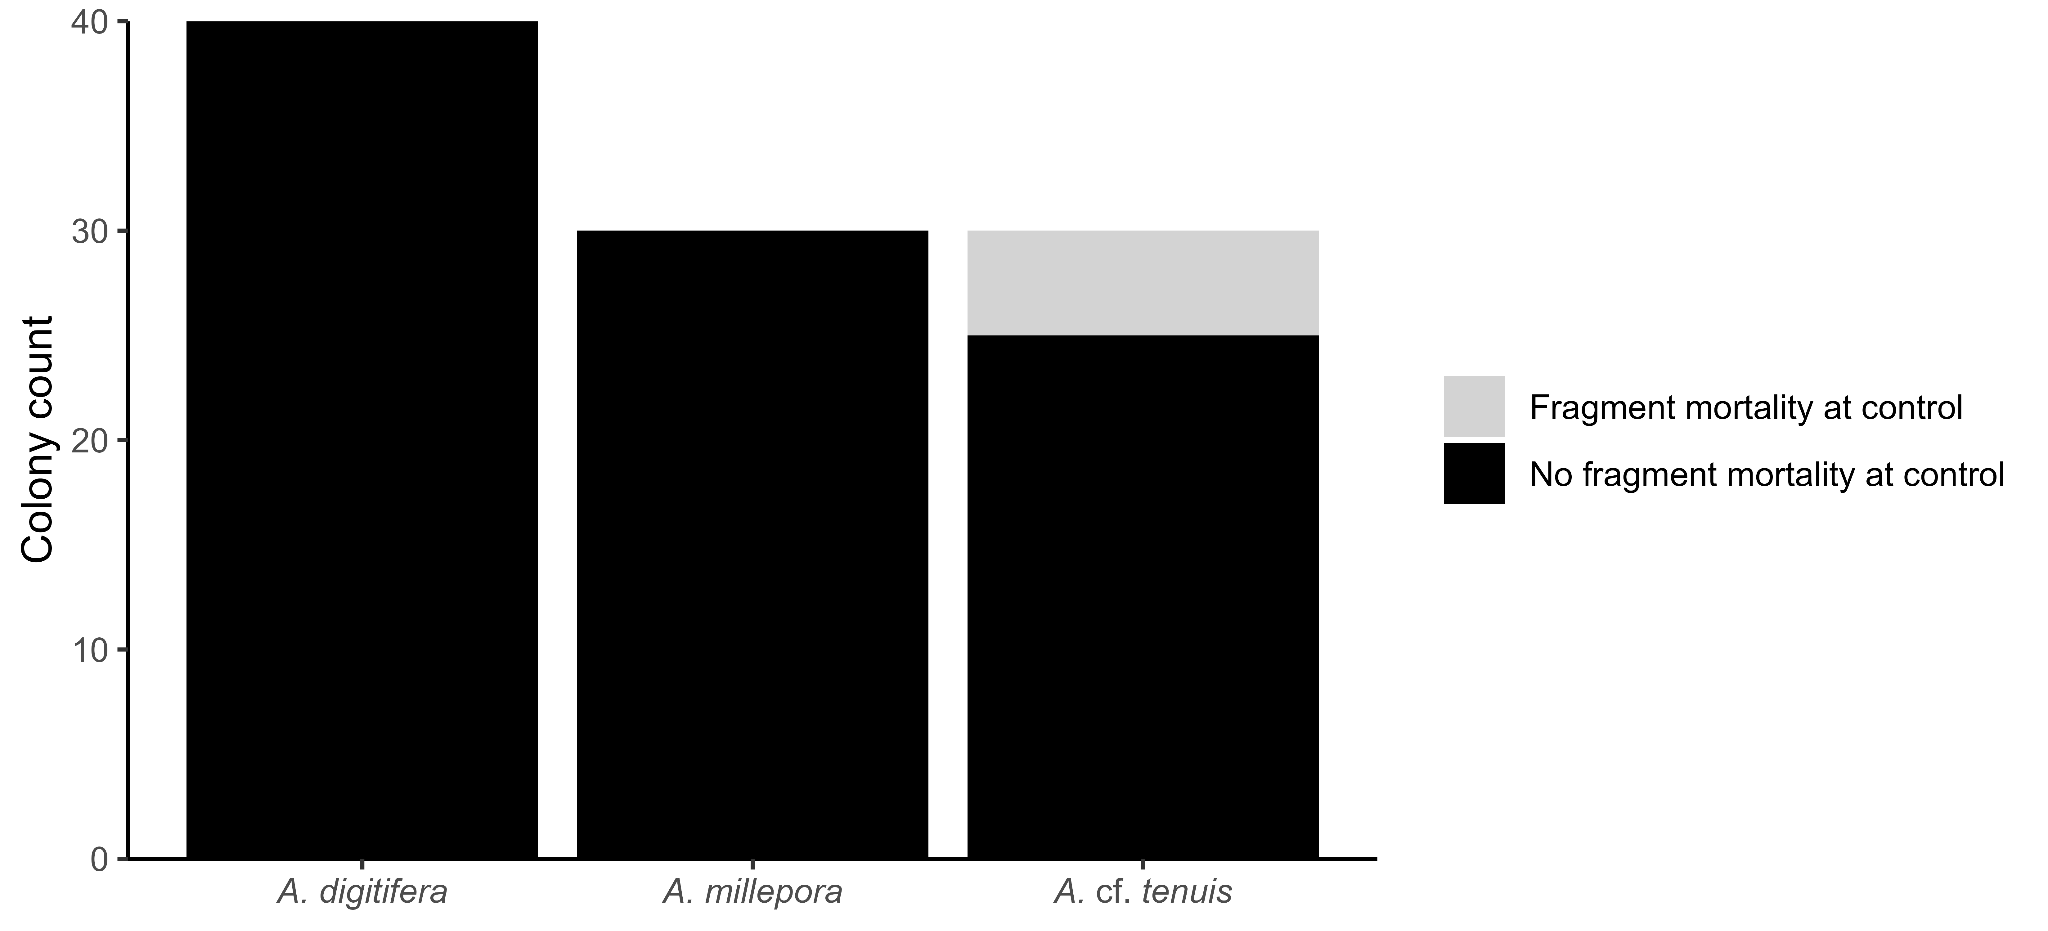


**Fig. S3** Number ofcolonies of *A. digitifera*, *A. millepora* and *A.* cf. *tenuis* used in the experiment. Colonies with fragments that exhibited bleaching in control tanks (29 °C) during the course of the experiment are shown in gray.


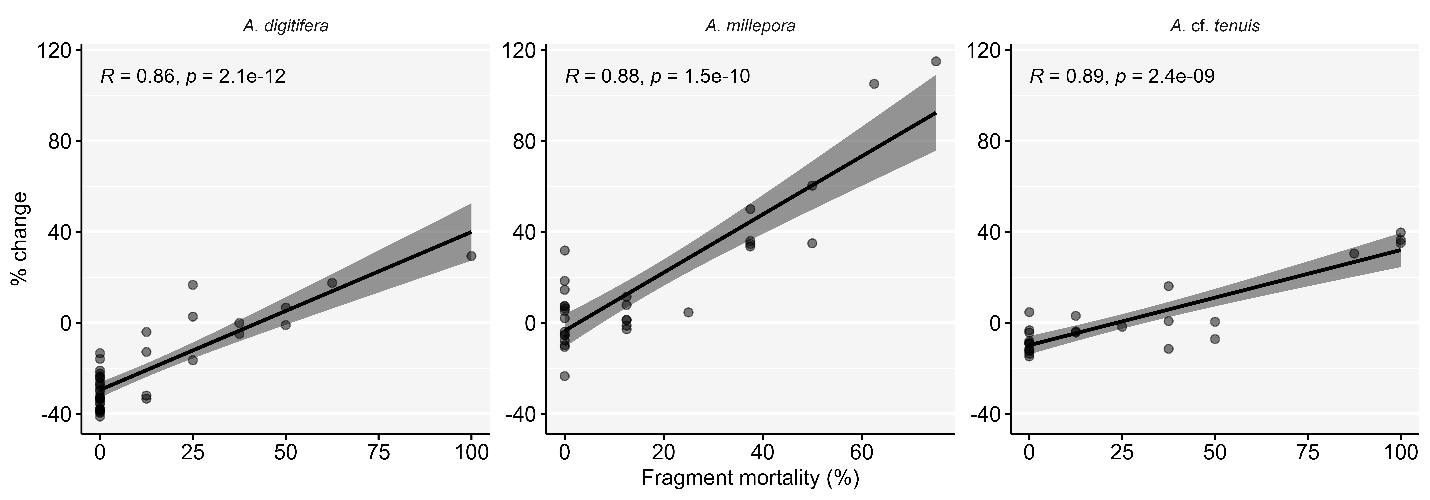


**Fig. S4** Correlation of fragment mortality and % color change in *A. digitifera*, *A. millepora*, and *A.* cf. *tenuis.* Black line represents regression line with shadow denoting confidence interval. Points represent each colony.


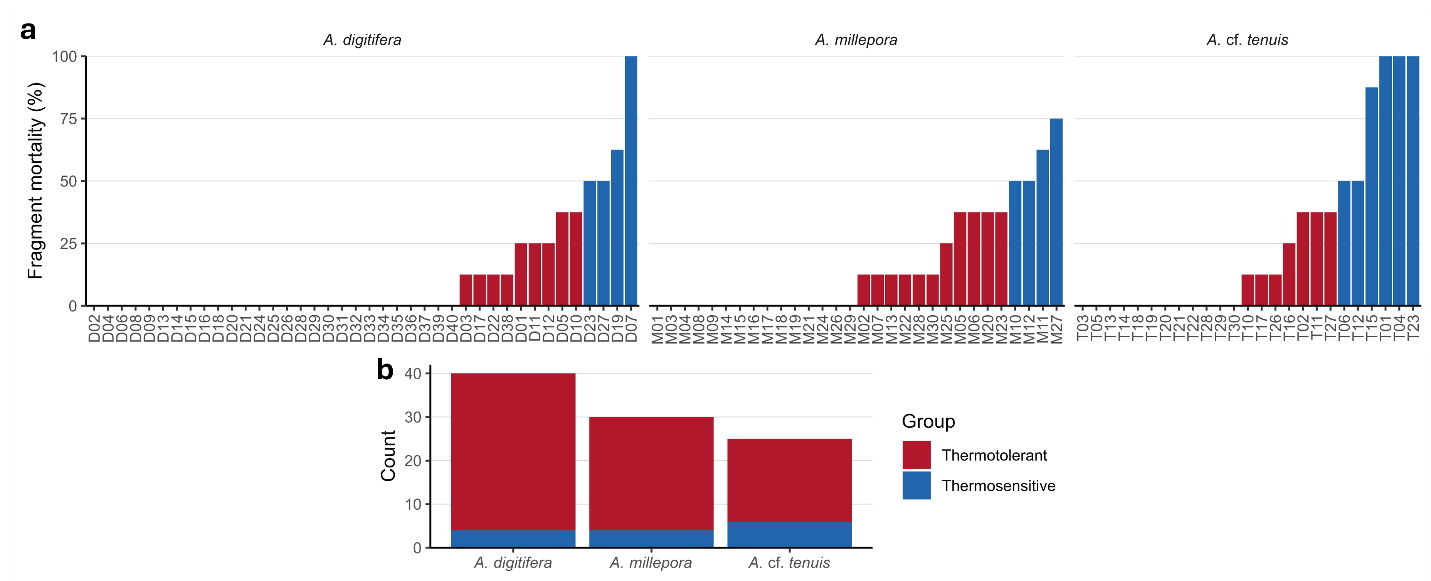
**Fig. S5** Thermotolerance classification based on fragment mortality of *A. digitifera*, *A. millepor*a and *A.* cf. *tenuis*. (**a**) Bar plots of colonies ranked from lowest to highest proportion of fragment mortality. (**b**)Colonies classified as thermotolerant or thermosensitive based on fragment mortality (red, thermotolerant < 50% fragment mortality; blue, thermosensitive ≥ 50% fragment mortality).


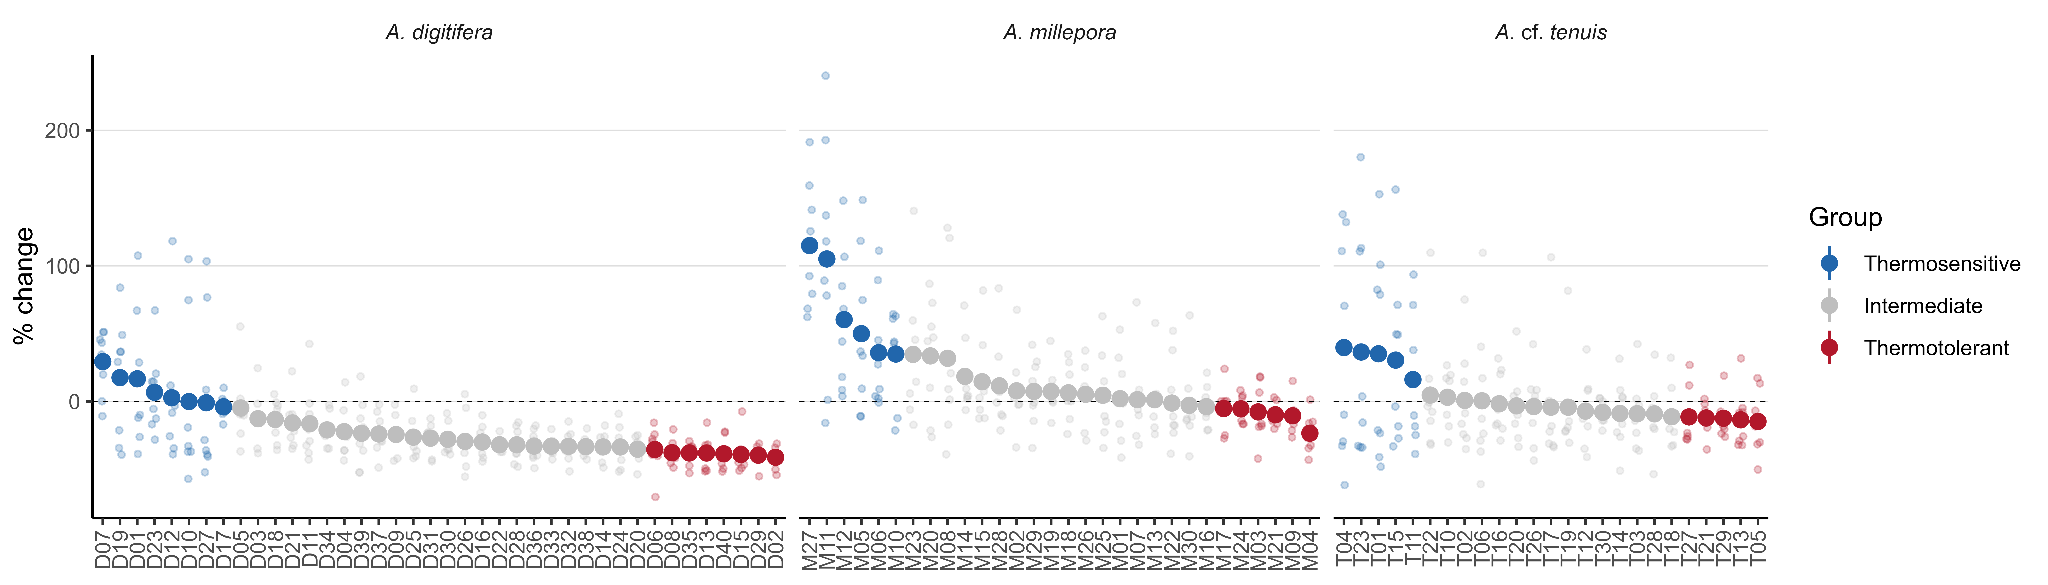


**Fig. S6** Scatterplots of *A. digitifera*, *A. millepora* and *A.* cf. *tenuis* colonies ranked from highest to lowest % color change. Colors represent thermosensitive (blue, 20% of colony population with greatest color change), intermediate (gray, middle 60%), or thermotolerant colonies (red, 20% with least color change). Big circles represent mean values.


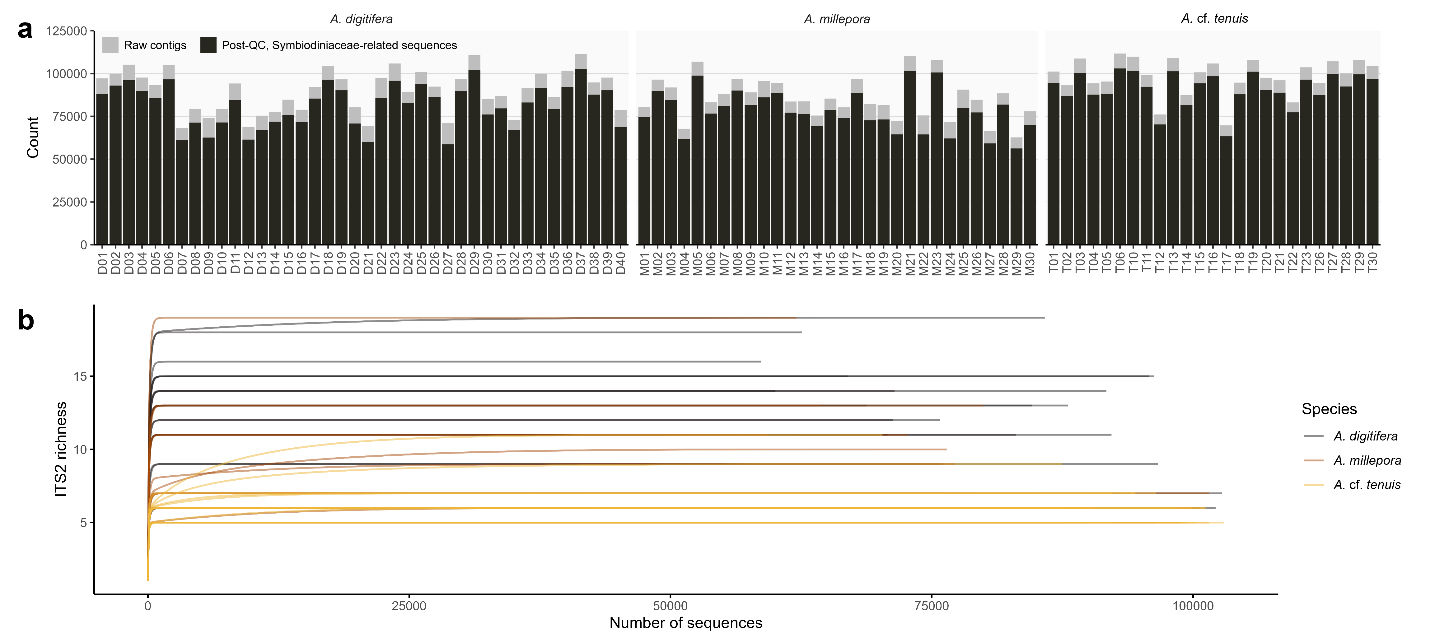


**Fig. S7** ITS2 sequencing of acroporids.(**a**)Bar plots of ITS2 sequences extracted from *A. digitifera*, *A. millepora,* and *A.* cf. *tenuis*. Colors represent raw ITS2 contigs (gray) and post-quality checking, Symbiodiniaceae-related ITS2 sequences (black). (**b**) Rarefaction curves of ITS2 sequences per *Acropora* colony.


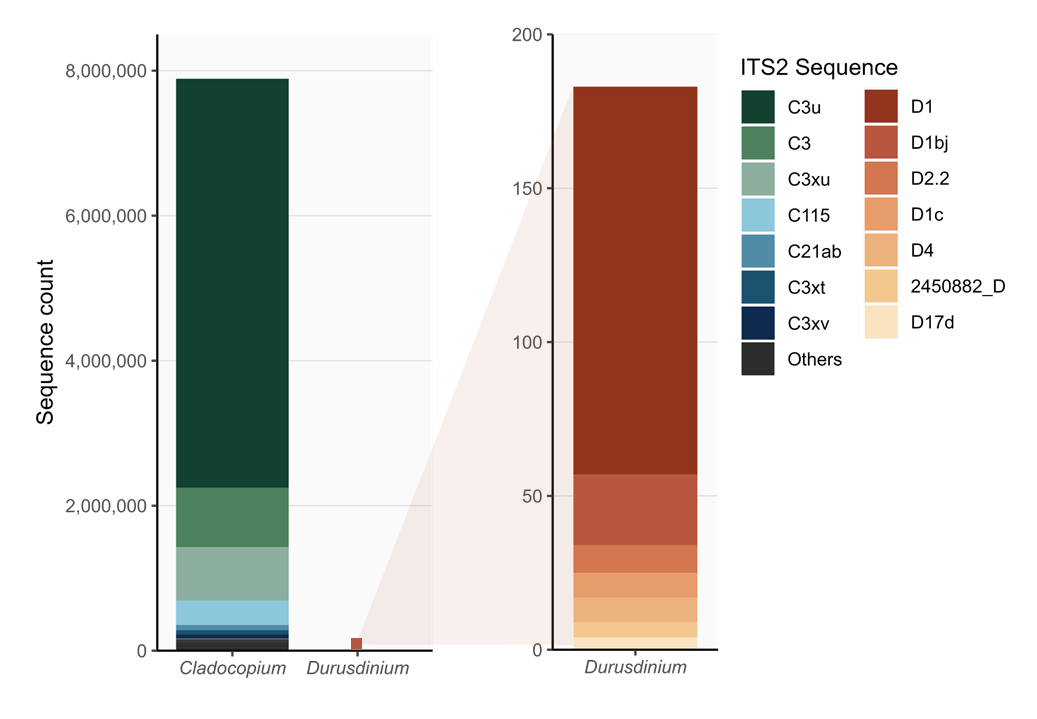


**Fig. S8** Identity of *Cladocopium* and *Durusdinium*-related ITS2 sequences. Colors represent sequence identity.


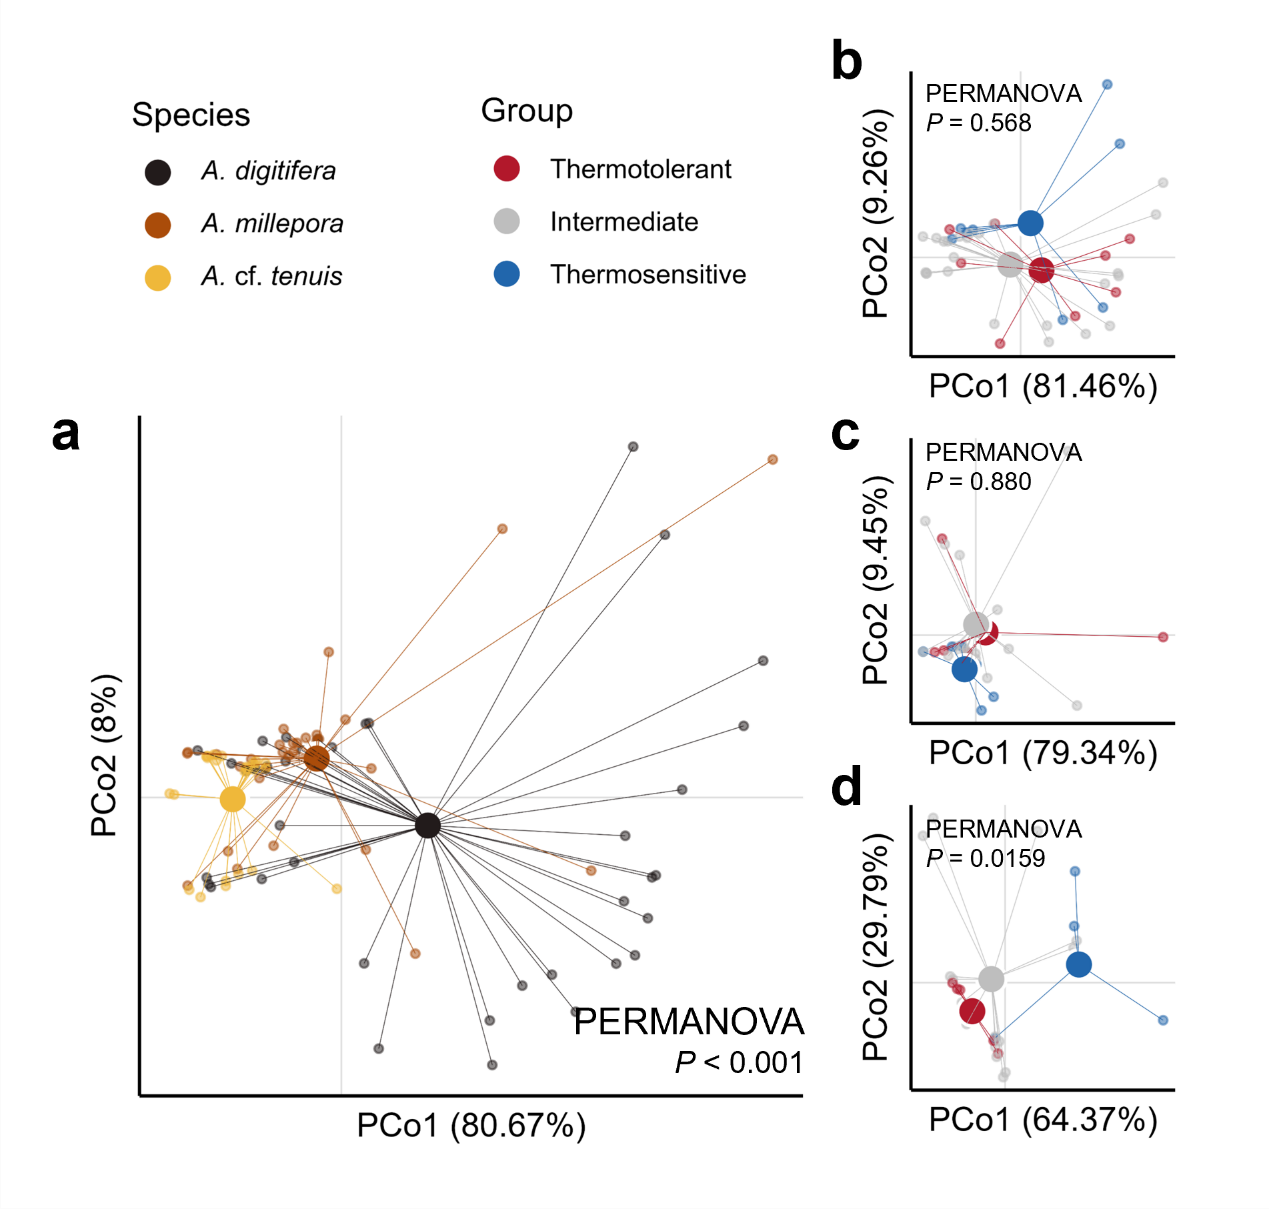


**Fig. S9** PCoA plots based on percentage difference (Bray-Curtis dissimilarity) of ITS2 sequences among (**a**) *Acropora* species, and among individuals of (**b**) *Acropora digitifera*, (**c**) *A. millepora* and (**d**) *A.* cf. *tenuis*. Colors in A denote *Acropora* species, while colors in B-D indicate thermotolerance classification. Lines denote the distance of each sample (small circle) to the group centroid (big circle).


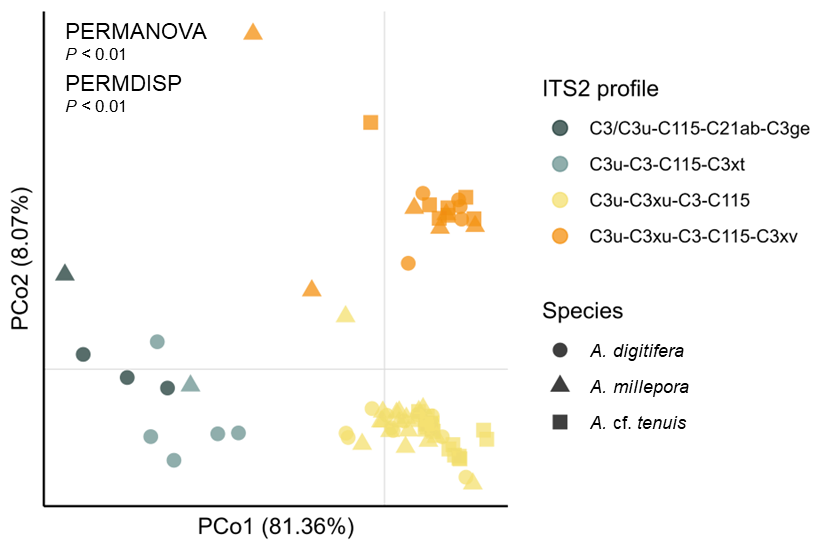


**Fig. S10** PCoA plot based on weighted Unifrac of ITS2 sequences among subsampled *Acropora* species (25 per species). Colors depict ITS2 profiles while shapes represent host coral species.


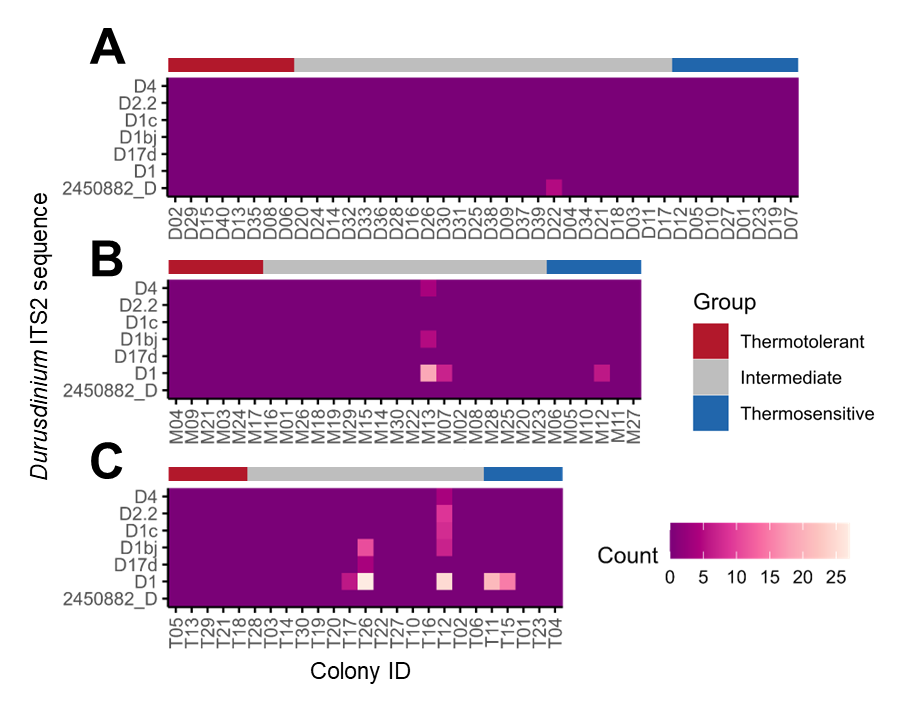


**Fig. S11** *Durusdinium* ITS2 sequences in (**A**) *Acropora digitifera*, (**B**) *A. millepora* and (**C**) *A.* cf. *tenuis* colonies. Heatmaps represent sequence counts. Color bars on top of each heatmap denotes thermotolerance group.
