# Supplementary material
Source: Research Square preprint supplement (doi:10.21203/rs.3.rs-8838536/v1)
Supplement: Supplementary file 2 [file af89211d295ff255f8ead137.xlsx]

## Sheet: TOC
Name	Description
TOC	Table of contents
TS01	Table S1. Temperature in flow-through seawater tanks (°C) over a 24-hour period (30-minute to hourly intervals).
TS02	Table S2. pH and temperature in tanks throughout the experimental period.
TS03	Table S3. Daily health record of A. digitifera, A. millepora and A. cf. tenuis fragments from laboratory acclimatization period to exposure period.
TS04	Table S4. A. cf. tenuis colonies with fragments that bleached in control tanks (29 °C). These colonies were excluded from subsequent analysis.
TS05	Table S5. Dunn’s test of incidence of mortality (IOMall), % color change (%ΔCall), and colony stress index (CSIall) among Acropora species at day 10.
TS06	Table S6. Metadata of mortality-based thermotolerance classification.
TS07	Table S7. Metadata of % color change-based thermotolerance classification.
TS08	Table S8. Metadata of IOM, %ΔC, and CSI.
TS09	Table S9. Identity and total counts of Cladocopium and Durusdinium-related ITS2 sequences.
TS10	Table S10. Results of the distance-based redundancy analysis (dbRDA) permutation test (9,999 permutations) examining the correlation between host thermotolerance parameter and ITS2 sequences. The test was performed using weighted Unifrac computed from square root-transformed ITS2 sequence counts.
TS11	Table S11. Dunn’s test of incidence of mortality (IOMall), % color change (%ΔCall), and colony stress index (CSIall) among ITS2 profiles.
TS12	Table S12. PERMANOVA and PERMDISP results of percentage difference (Bray-Curtis dissimilarity) of ITS2 sequences between high and low thermotolerance colonies and among Acropora species (9,999 permutations).
TS13	Table S13. PERMANOVA results from 100 bootstrapped subsamples based on weighted Unifrac of square root-transformed ITS2 sequence counts. Bootstrapping was performed to account for unequal sampling sizes among Acropora species. Each row represents the output from one iteration, including pseudo-F statistics and associated p-values.
TS14	Table S14. PERMDISP results from 100 bootstrapped subsamples based on weighted Unifrac of square root-transformed ITS2 sequence counts. Bootstrapping was performed to account for unequal sampling sizes among Acropora species. Each row represents the output from one iteration, including pseudo-F statistics and associated p-values.
TS15	Table S15. PERMANOVA and PERMDISP results based on weighted Unifrac of square root-transformed ITS2 sequence counts. Shown are the outputs from the bootstrapped iteration with a pseudo-F statistic closest to the median of 100 subsampled runs, conducted to account for differences in sampling size among groups.

## Sheet: TS01
Species	Date	Time	Temperature_DegC	DateComplete
A. digitifera	2021-10-27	17:00:00	29.752	2021-10-27 17:00:00
A. digitifera	2021-10-27	17:30:00	29.752	2021-10-27 17:30:00
A. digitifera	2021-10-27	18:00:00	29.652	2021-10-27 18:00:00
A. digitifera	2021-10-27	18:30:00	29.652	2021-10-27 18:30:00
A. digitifera	2021-10-27	19:00:00	29.552	2021-10-27 19:00:00
A. digitifera	2021-10-27	19:30:00	29.452	2021-10-27 19:30:00
A. digitifera	2021-10-27	20:00:00	29.352	2021-10-27 20:00:00
A. digitifera	2021-10-27	20:30:00	29.352	2021-10-27 20:30:00
A. digitifera	2021-10-27	21:00:00	29.252	2021-10-27 21:00:00
A. digitifera	2021-10-27	21:30:00	29.152	2021-10-27 21:30:00
A. digitifera	2021-10-27	22:00:00	29.053	2021-10-27 22:00:00
A. digitifera	2021-10-27	22:30:00	28.853	2021-10-27 22:30:00
A. digitifera	2021-10-27	23:00:00	28.754	2021-10-27 23:00:00
A. digitifera	2021-10-27	23:30:00	28.655	2021-10-27 23:30:00
A. digitifera	2021-10-28	00:00:00	28.555	2021-10-28
A. digitifera	2021-10-28	00:30:00	28.456	2021-10-28 00:30:00
A. digitifera	2021-10-28	01:00:00	28.357	2021-10-28 01:00:00
A. digitifera	2021-10-28	01:30:00	28.258	2021-10-28 01:30:00
A. digitifera	2021-10-28	02:00:00	28.159	2021-10-28 02:00:00
A. digitifera	2021-10-28	02:30:00	28.06	2021-10-28 02:30:00
A. digitifera	2021-10-28	03:00:00	27.961	2021-10-28 03:00:00
A. digitifera	2021-10-28	03:30:00	27.862	2021-10-28 03:30:00
A. digitifera	2021-10-28	04:00:00	27.764	2021-10-28 04:00:00
A. digitifera	2021-10-28	04:30:00	27.764	2021-10-28 04:30:00
A. digitifera	2021-10-28	05:00:00	27.665	2021-10-28 05:00:00
A. digitifera	2021-10-28	05:30:00	27.567	2021-10-28 05:30:00
A. digitifera	2021-10-28	06:00:00	27.468	2021-10-28 06:00:00
A. digitifera	2021-10-28	06:30:00	27.37	2021-10-28 06:30:00
A. digitifera	2021-10-28	07:00:00	27.37	2021-10-28 07:00:00
A. digitifera	2021-10-28	07:30:00	27.468	2021-10-28 07:30:00
A. digitifera	2021-10-28	08:00:00	27.567	2021-10-28 08:00:00
A. digitifera	2021-10-28	08:30:00	27.665	2021-10-28 08:30:00
A. digitifera	2021-10-28	09:00:00	27.862	2021-10-28 09:00:00
A. digitifera	2021-10-28	09:30:00	27.961	2021-10-28 09:30:00
A. digitifera	2021-10-28	10:00:00	28.06	2021-10-28 10:00:00
A. digitifera	2021-10-28	10:30:00	28.258	2021-10-28 10:30:00
A. digitifera	2021-10-28	11:00:00	28.555	2021-10-28 11:00:00
A. digitifera	2021-10-28	11:30:00	28.655	2021-10-28 11:30:00
A. digitifera	2021-10-28	12:00:00	28.853	2021-10-28 12:00:00
A. digitifera	2021-10-28	12:30:00	29.053	2021-10-28 12:30:00
A. digitifera	2021-10-28	13:00:00	29.252	2021-10-28 13:00:00
A. digitifera	2021-10-28	13:30:00	29.352	2021-10-28 13:30:00
A. digitifera	2021-10-28	14:00:00	29.452	2021-10-28 14:00:00
A. digitifera	2021-10-28	14:30:00	29.552	2021-10-28 14:30:00
A. digitifera	2021-10-28	15:00:00	29.552	2021-10-28 15:00:00
A. digitifera	2021-10-28	15:30:00	29.552	2021-10-28 15:30:00
A. digitifera	2021-10-28	16:00:00	29.652	2021-10-28 16:00:00
A. digitifera	2021-10-28	16:30:00	29.652	2021-10-28 16:30:00
A. digitifera	2021-10-28	17:00:00	29.552	2021-10-28 17:00:00
A. millepora	2021-10-05	17:00:00	30.255	2021-10-05 17:00:00
A. millepora	2021-10-05	18:00:00	30.255	2021-10-05 18:00:00
A. millepora	2021-10-05	19:00:00	30.154	2021-10-05 19:00:00
A. millepora	2021-10-05	20:00:00	30.054	2021-10-05 20:00:00
A. millepora	2021-10-05	21:00:00	29.853	2021-10-05 21:00:00
A. millepora	2021-10-05	22:00:00	29.752	2021-10-05 22:00:00
A. millepora	2021-10-05	23:00:00	29.552	2021-10-05 23:00:00
A. millepora	2021-10-06	00:00:00	29.452	2021-10-06
A. millepora	2021-10-06	01:00:00	29.352	2021-10-06 01:00:00
A. millepora	2021-10-06	02:00:00	29.252	2021-10-06 02:00:00
A. millepora	2021-10-06	03:00:00	29.152	2021-10-06 03:00:00
A. millepora	2021-10-06	04:00:00	28.953	2021-10-06 04:00:00
A. millepora	2021-10-06	05:00:00	28.953	2021-10-06 05:00:00
A. millepora	2021-10-06	06:00:00	28.853	2021-10-06 06:00:00
A. millepora	2021-10-06	07:00:00	28.853	2021-10-06 07:00:00
A. millepora	2021-10-06	08:00:00	28.953	2021-10-06 08:00:00
A. millepora	2021-10-06	09:00:00	29.053	2021-10-06 09:00:00
A. millepora	2021-10-06	10:00:00	29.452	2021-10-06 10:00:00
A. millepora	2021-10-06	11:00:00	29.652	2021-10-06 11:00:00
A. millepora	2021-10-06	12:00:00	29.953	2021-10-06 12:00:00
A. millepora	2021-10-06	13:00:00	30.154	2021-10-06 13:00:00
A. millepora	2021-10-06	14:00:00	30.255	2021-10-06 14:00:00
A. millepora	2021-10-06	15:00:00	30.154	2021-10-06 15:00:00
A. millepora	2021-10-06	16:00:00	30.255	2021-10-06 16:00:00
A. millepora	2021-10-06	17:00:00	30.154	2021-10-06 17:00:00
A.cf. tenuis	2021-11-12	17:00:00	30.054	2021-11-12 17:00:00
A.cf. tenuis	2021-11-12	17:30:00	29.953	2021-11-12 17:30:00
A.cf. tenuis	2021-11-12	18:00:00	29.953	2021-11-12 18:00:00
A.cf. tenuis	2021-11-12	18:30:00	29.853	2021-11-12 18:30:00
A.cf. tenuis	2021-11-12	19:00:00	29.853	2021-11-12 19:00:00
A.cf. tenuis	2021-11-12	19:30:00	29.853	2021-11-12 19:30:00
A.cf. tenuis	2021-11-12	20:00:00	29.752	2021-11-12 20:00:00
A.cf. tenuis	2021-11-12	20:30:00	29.752	2021-11-12 20:30:00
A.cf. tenuis	2021-11-12	21:00:00	29.652	2021-11-12 21:00:00
A.cf. tenuis	2021-11-12	21:30:00	29.652	2021-11-12 21:30:00
A.cf. tenuis	2021-11-12	22:00:00	29.652	2021-11-12 22:00:00
A.cf. tenuis	2021-11-12	22:30:00	29.652	2021-11-12 22:30:00
A.cf. tenuis	2021-11-12	23:00:00	29.552	2021-11-12 23:00:00
A.cf. tenuis	2021-11-12	23:30:00	29.552	2021-11-12 23:30:00
A.cf. tenuis	2021-11-13	00:00:00	29.452	2021-11-13
A.cf. tenuis	2021-11-13	00:30:00	29.452	2021-11-13 00:30:00
A.cf. tenuis	2021-11-13	01:00:00	29.352	2021-11-13 01:00:00
A.cf. tenuis	2021-11-13	01:30:00	29.252	2021-11-13 01:30:00
A.cf. tenuis	2021-11-13	02:00:00	29.252	2021-11-13 02:00:00
A.cf. tenuis	2021-11-13	02:30:00	29.152	2021-11-13 02:30:00
A.cf. tenuis	2021-11-13	03:00:00	29.152	2021-11-13 03:00:00
A.cf. tenuis	2021-11-13	03:30:00	29.053	2021-11-13 03:30:00
A.cf. tenuis	2021-11-13	04:00:00	29.053	2021-11-13 04:00:00
A.cf. tenuis	2021-11-13	04:30:00	28.953	2021-11-13 04:30:00
A.cf. tenuis	2021-11-13	05:00:00	28.953	2021-11-13 05:00:00
A.cf. tenuis	2021-11-13	05:30:00	28.853	2021-11-13 05:30:00
A.cf. tenuis	2021-11-13	06:00:00	28.754	2021-11-13 06:00:00
A.cf. tenuis	2021-11-13	06:30:00	28.754	2021-11-13 06:30:00
A.cf. tenuis	2021-11-13	07:00:00	28.655	2021-11-13 07:00:00
A.cf. tenuis	2021-11-13	07:30:00	28.655	2021-11-13 07:30:00
A.cf. tenuis	2021-11-13	08:00:00	28.655	2021-11-13 08:00:00
A.cf. tenuis	2021-11-13	08:30:00	28.754	2021-11-13 08:30:00
A.cf. tenuis	2021-11-13	09:00:00	28.754	2021-11-13 09:00:00
A.cf. tenuis	2021-11-13	09:30:00	28.953	2021-11-13 09:30:00
A.cf. tenuis	2021-11-13	10:00:00	29.053	2021-11-13 10:00:00
A.cf. tenuis	2021-11-13	10:30:00	29.152	2021-11-13 10:30:00
A.cf. tenuis	2021-11-13	11:00:00	29.252	2021-11-13 11:00:00
A.cf. tenuis	2021-11-13	11:30:00	29.452	2021-11-13 11:30:00
A.cf. tenuis	2021-11-13	12:00:00	29.652	2021-11-13 12:00:00
A.cf. tenuis	2021-11-13	12:30:00	29.752	2021-11-13 12:30:00
A.cf. tenuis	2021-11-13	13:00:00	29.953	2021-11-13 13:00:00
A.cf. tenuis	2021-11-13	13:30:00	30.054	2021-11-13 13:30:00
A.cf. tenuis	2021-11-13	14:00:00	30.054	2021-11-13 14:00:00
A.cf. tenuis	2021-11-13	14:30:00	30.154	2021-11-13 14:30:00
A.cf. tenuis	2021-11-13	15:00:00	30.154	2021-11-13 15:00:00
A.cf. tenuis	2021-11-13	15:30:00	30.154	2021-11-13 15:30:00
A.cf. tenuis	2021-11-13	16:00:00	30.154	2021-11-13 16:00:00
A.cf. tenuis	2021-11-13	16:30:00	30.154	2021-11-13 16:30:00
A.cf. tenuis	2021-11-13	17:00:00	30.054	2021-11-13 17:00:00

## Sheet: TS02
Species	Date	Time	Tank	Control_HeatStress	Replicate	Temperature	pH
A. cf. tenuis	2021-11-13	16:00:00	1	Control	1	28.6	8.02
A. cf. tenuis	2021-11-13	16:00:00	1	Control	2	28.6	8.03
A. cf. tenuis	2021-11-13	16:00:00	1	Control	3	28.5	8.03
A. cf. tenuis	2021-11-13	16:00:00	2	Control	1	29	8.02
A. cf. tenuis	2021-11-13	16:00:00	2	Control	2	29	8.02
A. cf. tenuis	2021-11-13	16:00:00	2	Control	3	29	8.02
A. cf. tenuis	2021-11-13	16:00:00	3	HeatStress	1	28.9	8.02
A. cf. tenuis	2021-11-13	16:00:00	3	HeatStress	2	28.9	8.02
A. cf. tenuis	2021-11-13	16:00:00	3	HeatStress	3	28.9	8.01
A. cf. tenuis	2021-11-13	16:00:00	4	HeatStress	1	28.8	8.01
A. cf. tenuis	2021-11-13	16:00:00	4	HeatStress	2	28.8	8.02
A. cf. tenuis	2021-11-13	16:00:00	4	HeatStress	3	28.8	8.01
A. cf. tenuis	2021-11-13	16:00:00	5	HeatStress	1	28.7	8.02
A. cf. tenuis	2021-11-13	16:00:00	5	HeatStress	2	28.7	8.02
A. cf. tenuis	2021-11-13	16:00:00	5	HeatStress	3	28.7	8.02
A. cf. tenuis	2021-11-13	16:00:00	6	Control	1	28.6	8.03
A. cf. tenuis	2021-11-13	16:00:00	6	Control	2	28.6	8.03
A. cf. tenuis	2021-11-13	16:00:00	6	Control	3	28.6	8.03
A. cf. tenuis	2021-11-13	16:00:00	7	HeatStress	1	28.7	8.02
A. cf. tenuis	2021-11-13	16:00:00	7	HeatStress	2	28.7	8.02
A. cf. tenuis	2021-11-13	16:00:00	7	HeatStress	3	28.8	8.03
A. cf. tenuis	2021-11-13	16:00:00	8	Control	1	28.6	8.02
A. cf. tenuis	2021-11-13	16:00:00	8	Control	2	28.6	8.03
A. cf. tenuis	2021-11-13	16:00:00	8	Control	3	28.6	8.03
A. cf. tenuis	2021-11-14	09:00:00	1	Control	1	28.7	8.15
A. cf. tenuis	2021-11-14	09:00:00	1	Control	2	28.7	8.15
A. cf. tenuis	2021-11-14	09:00:00	1	Control	3	28.5	8.16
A. cf. tenuis	2021-11-14	09:00:00	2	Control	1	28.9	8.09
A. cf. tenuis	2021-11-14	09:00:00	2	Control	2	28.9	8.09
A. cf. tenuis	2021-11-14	09:00:00	2	Control	3	28.8	8.09
A. cf. tenuis	2021-11-14	09:00:00	3	HeatStress	1	28.8	8.08
A. cf. tenuis	2021-11-14	09:00:00	3	HeatStress	2	28.8	8.08
A. cf. tenuis	2021-11-14	09:00:00	3	HeatStress	3	28.8	8.08
A. cf. tenuis	2021-11-14	09:00:00	4	HeatStress	1	28.7	8.07
A. cf. tenuis	2021-11-14	09:00:00	4	HeatStress	2	28.7	8.07
A. cf. tenuis	2021-11-14	09:00:00	4	HeatStress	3	28.5	8.07
A. cf. tenuis	2021-11-14	09:00:00	5	HeatStress	1	28.7	8.07
A. cf. tenuis	2021-11-14	09:00:00	5	HeatStress	2	28.7	8.07
A. cf. tenuis	2021-11-14	09:00:00	5	HeatStress	3	28.7	8.07
A. cf. tenuis	2021-11-14	09:00:00	6	Control	1	28.8	8.06
A. cf. tenuis	2021-11-14	09:00:00	6	Control	2	28.8	8.06
A. cf. tenuis	2021-11-14	09:00:00	6	Control	3	28.9	8.06
A. cf. tenuis	2021-11-14	09:00:00	7	HeatStress	1	29.1	8.09
A. cf. tenuis	2021-11-14	09:00:00	7	HeatStress	2	29	8.09
A. cf. tenuis	2021-11-14	09:00:00	7	HeatStress	3	29	8.11
A. cf. tenuis	2021-11-14	09:00:00	8	Control	1	28.6	8.09
A. cf. tenuis	2021-11-14	09:00:00	8	Control	2	28.6	8.09
A. cf. tenuis	2021-11-14	09:00:00	8	Control	3	28.6	8.09
A. cf. tenuis	2021-11-14	14:00:00	1	Control	1	28.9	8.15
A. cf. tenuis	2021-11-14	14:00:00	1	Control	2	28.8	8.15
A. cf. tenuis	2021-11-14	14:00:00	1	Control	3	28.8	8.16
A. cf. tenuis	2021-11-14	14:00:00	2	Control	1	28.7	8.1
A. cf. tenuis	2021-11-14	14:00:00	2	Control	2	28.7	8.1
A. cf. tenuis	2021-11-14	14:00:00	2	Control	3	28.7	8.11
A. cf. tenuis	2021-11-14	14:00:00	3	HeatStress	1	28.7	8.07
A. cf. tenuis	2021-11-14	14:00:00	3	HeatStress	2	28.7	8.07
A. cf. tenuis	2021-11-14	14:00:00	3	HeatStress	3	28.6	8.08
A. cf. tenuis	2021-11-14	14:00:00	4	HeatStress	1	28.6	8.06
A. cf. tenuis	2021-11-14	14:00:00	4	HeatStress	2	28.6	8.06
A. cf. tenuis	2021-11-14	14:00:00	4	HeatStress	3	28.6	8.06
A. cf. tenuis	2021-11-14	14:00:00	5	HeatStress	1	28.7	8.07
A. cf. tenuis	2021-11-14	14:00:00	5	HeatStress	2	28.7	8.08
A. cf. tenuis	2021-11-14	14:00:00	5	HeatStress	3	28.6	8.08
A. cf. tenuis	2021-11-14	14:00:00	6	Control	1	28.8	8.05
A. cf. tenuis	2021-11-14	14:00:00	6	Control	2	28.8	8.06
A. cf. tenuis	2021-11-14	14:00:00	6	Control	3	28.9	8.07
A. cf. tenuis	2021-11-14	14:00:00	7	HeatStress	1	29	8.1
A. cf. tenuis	2021-11-14	14:00:00	7	HeatStress	2	29	8.1
A. cf. tenuis	2021-11-14	14:00:00	7	HeatStress	3	29	8.1
A. cf. tenuis	2021-11-14	14:00:00	8	Control	1	28.6	8.09
A. cf. tenuis	2021-11-14	14:00:00	8	Control	2	28.6	8.09
A. cf. tenuis	2021-11-14	14:00:00	8	Control	3	28.6	8.08
A. cf. tenuis	2021-11-14	16:30:00	1	Control	1	28.5	8.14
A. cf. tenuis	2021-11-14	16:30:00	1	Control	2	28.6	8.14
A. cf. tenuis	2021-11-14	16:30:00	1	Control	3	28.6	8.16
A. cf. tenuis	2021-11-14	16:30:00	2	Control	1	28.6	8.08
A. cf. tenuis	2021-11-14	16:30:00	2	Control	2	28.7	8.08
A. cf. tenuis	2021-11-14	16:30:00	2	Control	3	28.7	8.07
A. cf. tenuis	2021-11-14	16:30:00	3	HeatStress	1	28.8	8.05
A. cf. tenuis	2021-11-14	16:30:00	3	HeatStress	2	28.8	8.05
A. cf. tenuis	2021-11-14	16:30:00	3	HeatStress	3	28.9	8.05
A. cf. tenuis	2021-11-14	16:30:00	4	HeatStress	1	28.6	8.04
A. cf. tenuis	2021-11-14	16:30:00	4	HeatStress	2	28.6	8.04
A. cf. tenuis	2021-11-14	16:30:00	4	HeatStress	3	28.5	8.04
A. cf. tenuis	2021-11-14	16:30:00	5	HeatStress	1	28.6	8.07
A. cf. tenuis	2021-11-14	16:30:00	5	HeatStress	2	28.6	8.07
A. cf. tenuis	2021-11-14	16:30:00	5	HeatStress	3	28.7	8.08
A. cf. tenuis	2021-11-14	16:30:00	6	Control	1	29.2	8.02
A. cf. tenuis	2021-11-14	16:30:00	6	Control	2	29.2	8.02
A. cf. tenuis	2021-11-14	16:30:00	6	Control	3	29	8.02
A. cf. tenuis	2021-11-14	16:30:00	7	HeatStress	1	28.8	8.07
A. cf. tenuis	2021-11-14	16:30:00	7	HeatStress	2	28.8	8.07
A. cf. tenuis	2021-11-14	16:30:00	7	HeatStress	3	28.8	8.07
A. cf. tenuis	2021-11-14	16:30:00	8	Control	1	28.6	8.04
A. cf. tenuis	2021-11-14	16:30:00	8	Control	2	28.6	8.04
A. cf. tenuis	2021-11-14	16:30:00	8	Control	3	28.7	8.05
A. cf. tenuis	2021-11-15	09:00:00	1	Control	1	28.7	8.1
A. cf. tenuis	2021-11-15	09:00:00	1	Control	2	28.6	8.1
A. cf. tenuis	2021-11-15	09:00:00	1	Control	3	28.6	8.11
A. cf. tenuis	2021-11-15	09:00:00	2	Control	1	28.8	8.05
A. cf. tenuis	2021-11-15	09:00:00	2	Control	2	28.8	8.05
A. cf. tenuis	2021-11-15	09:00:00	2	Control	3	28.8	8.05
A. cf. tenuis	2021-11-15	09:00:00	3	HeatStress	1	28.8	8.04
A. cf. tenuis	2021-11-15	09:00:00	3	HeatStress	2	28.8	8.04
A. cf. tenuis	2021-11-15	09:00:00	3	HeatStress	3	28.8	8.02
A. cf. tenuis	2021-11-15	09:00:00	4	HeatStress	1	28.6	8.01
A. cf. tenuis	2021-11-15	09:00:00	4	HeatStress	2	28.6	8.01
A. cf. tenuis	2021-11-15	09:00:00	4	HeatStress	3	28.6	8.01
A. cf. tenuis	2021-11-15	09:00:00	5	HeatStress	1	28.7	8.02
A. cf. tenuis	2021-11-15	09:00:00	5	HeatStress	2	28.7	8.02
A. cf. tenuis	2021-11-15	09:00:00	5	HeatStress	3	28.7	8.02
A. cf. tenuis	2021-11-15	09:00:00	6	Control	1	28.9	8.01
A. cf. tenuis	2021-11-15	09:00:00	6	Control	2	28.9	8.01
A. cf. tenuis	2021-11-15	09:00:00	6	Control	3	28.9	8.01
A. cf. tenuis	2021-11-15	09:00:00	7	HeatStress	1	28.7	8.05
A. cf. tenuis	2021-11-15	09:00:00	7	HeatStress	2	28.7	8.05
A. cf. tenuis	2021-11-15	09:00:00	7	HeatStress	3	28.7	8.05
A. cf. tenuis	2021-11-15	09:00:00	8	Control	1	28.7	8.04
A. cf. tenuis	2021-11-15	09:00:00	8	Control	2	28.7	8.04
A. cf. tenuis	2021-11-15	09:00:00	8	Control	3	28.7	8.04
A. cf. tenuis	2021-11-15	13:30:00	1	Control	1	28.6	8.11
A. cf. tenuis	2021-11-15	13:30:00	1	Control	2	28.6	8.11
A. cf. tenuis	2021-11-15	13:30:00	1	Control	3	28.5	8.12
A. cf. tenuis	2021-11-15	13:30:00	2	Control	1	28.9	8.05
A. cf. tenuis	2021-11-15	13:30:00	2	Control	2	28.9	8.05
A. cf. tenuis	2021-11-15	13:30:00	2	Control	3	28.9	8.06
A. cf. tenuis	2021-11-15	13:30:00	3	HeatStress	1	28.7	8.04
A. cf. tenuis	2021-11-15	13:30:00	3	HeatStress	2	28.8	8.04
A. cf. tenuis	2021-11-15	13:30:00	3	HeatStress	3	28.9	8.04
A. cf. tenuis	2021-11-15	13:30:00	4	HeatStress	1	28.5	8.03
A. cf. tenuis	2021-11-15	13:30:00	4	HeatStress	2	28.5	8.03
A. cf. tenuis	2021-11-15	13:30:00	4	HeatStress	3	28.6	8.04
A. cf. tenuis	2021-11-15	13:30:00	5	HeatStress	1	28.7	8.02
A. cf. tenuis	2021-11-15	13:30:00	5	HeatStress	2	28.7	8.02
A. cf. tenuis	2021-11-15	13:30:00	5	HeatStress	3	28.7	8.03
A. cf. tenuis	2021-11-15	13:30:00	6	Control	1	28.9	8.01
A. cf. tenuis	2021-11-15	13:30:00	6	Control	2	28.9	8.01
A. cf. tenuis	2021-11-15	13:30:00	6	Control	3	28.9	8.01
A. cf. tenuis	2021-11-15	13:30:00	7	HeatStress	1	28.8	8.05
A. cf. tenuis	2021-11-15	13:30:00	7	HeatStress	2	28.8	8.05
A. cf. tenuis	2021-11-15	13:30:00	7	HeatStress	3	28.8	8.05
A. cf. tenuis	2021-11-15	13:30:00	8	Control	1	28.6	8.03
A. cf. tenuis	2021-11-15	13:30:00	8	Control	2	28.6	8.03
A. cf. tenuis	2021-11-15	13:30:00	8	Control	3	28.6	8.03
A. cf. tenuis	2021-11-15	17:00:00	1	Control	1	28.8	8.1
A. cf. tenuis	2021-11-15	17:00:00	1	Control	2	28.8	8.1
A. cf. tenuis	2021-11-15	17:00:00	1	Control	3	28.7	8.11
A. cf. tenuis	2021-11-15	17:00:00	2	Control	1	28.7	8.06
A. cf. tenuis	2021-11-15	17:00:00	2	Control	2	28.7	8.06
A. cf. tenuis	2021-11-15	17:00:00	2	Control	3	28.5	8.05
A. cf. tenuis	2021-11-15	17:00:00	3	HeatStress	1	28.8	8.04
A. cf. tenuis	2021-11-15	17:00:00	3	HeatStress	2	28.8	8.04
A. cf. tenuis	2021-11-15	17:00:00	3	HeatStress	3	28.8	8.03
A. cf. tenuis	2021-11-15	17:00:00	4	HeatStress	1	28.6	8.03
A. cf. tenuis	2021-11-15	17:00:00	4	HeatStress	2	28.6	8.03
A. cf. tenuis	2021-11-15	17:00:00	4	HeatStress	3	28.6	8.03
A. cf. tenuis	2021-11-15	17:00:00	5	HeatStress	1	28.7	8.02
A. cf. tenuis	2021-11-15	17:00:00	5	HeatStress	2	28.7	8.02
A. cf. tenuis	2021-11-15	17:00:00	5	HeatStress	3	28.6	8.02
A. cf. tenuis	2021-11-15	17:00:00	6	Control	1	28.7	8.01
A. cf. tenuis	2021-11-15	17:00:00	6	Control	2	28.7	8.01
A. cf. tenuis	2021-11-15	17:00:00	6	Control	3	28.7	8.01
A. cf. tenuis	2021-11-15	17:00:00	7	HeatStress	1	29	8.05
A. cf. tenuis	2021-11-15	17:00:00	7	HeatStress	2	29	8.05
A. cf. tenuis	2021-11-15	17:00:00	7	HeatStress	3	28.9	8.05
A. cf. tenuis	2021-11-15	17:00:00	8	Control	1	28.7	8.03
A. cf. tenuis	2021-11-15	17:00:00	8	Control	2	28.7	8.03
A. cf. tenuis	2021-11-15	17:00:00	8	Control	3	28.7	8.02
A. cf. tenuis	2021-11-16	08:30:00	1	Control	1	28.6	8.14
A. cf. tenuis	2021-11-16	08:30:00	1	Control	2	28.6	8.15
A. cf. tenuis	2021-11-16	08:30:00	1	Control	3	28.4	8.15
A. cf. tenuis	2021-11-16	08:30:00	2	Control	1	28.5	8.08
A. cf. tenuis	2021-11-16	08:30:00	2	Control	2	28.5	8.08
A. cf. tenuis	2021-11-16	08:30:00	2	Control	3	28.5	8.08
A. cf. tenuis	2021-11-16	08:30:00	3	HeatStress	1	28.7	8.08
A. cf. tenuis	2021-11-16	08:30:00	3	HeatStress	2	28.8	8.07
A. cf. tenuis	2021-11-16	08:30:00	3	HeatStress	3	28.7	8.07
A. cf. tenuis	2021-11-16	08:30:00	4	HeatStress	1	28.6	8.05
A. cf. tenuis	2021-11-16	08:30:00	4	HeatStress	2	28.6	8.05
A. cf. tenuis	2021-11-16	08:30:00	4	HeatStress	3	28.6	8.05
A. cf. tenuis	2021-11-16	08:30:00	5	HeatStress	1	28.7	8.05
A. cf. tenuis	2021-11-16	08:30:00	5	HeatStress	2	28.7	8.05
A. cf. tenuis	2021-11-16	08:30:00	5	HeatStress	3	28.6	8.04
A. cf. tenuis	2021-11-16	08:30:00	6	Control	1	28.7	8.03
A. cf. tenuis	2021-11-16	08:30:00	6	Control	2	28.7	8.03
A. cf. tenuis	2021-11-16	08:30:00	6	Control	3	28.7	8.04
A. cf. tenuis	2021-11-16	08:30:00	7	HeatStress	1	29	8.07
A. cf. tenuis	2021-11-16	08:30:00	7	HeatStress	2	29	8.08
A. cf. tenuis	2021-11-16	08:30:00	7	HeatStress	3	29	8.08
A. cf. tenuis	2021-11-16	08:30:00	8	Control	1	28.6	8.07
A. cf. tenuis	2021-11-16	08:30:00	8	Control	2	28.6	8.07
A. cf. tenuis	2021-11-16	08:30:00	8	Control	3	28.6	8.07
A. cf. tenuis	2021-11-16	13:00:00	1	Control	1	28.7	8.1
A. cf. tenuis	2021-11-16	13:00:00	1	Control	2	28.7	8.11
A. cf. tenuis	2021-11-16	13:00:00	1	Control	3	28.6	8.11
A. cf. tenuis	2021-11-16	13:00:00	2	Control	1	28.7	8.08
A. cf. tenuis	2021-11-16	13:00:00	2	Control	2	28.8	8.08
A. cf. tenuis	2021-11-16	13:00:00	2	Control	3	28.8	8.08
A. cf. tenuis	2021-11-16	13:00:00	3	HeatStress	1	28.7	8.06
A. cf. tenuis	2021-11-16	13:00:00	3	HeatStress	2	28.7	8.06
A. cf. tenuis	2021-11-16	13:00:00	3	HeatStress	3	28.7	8.06
A. cf. tenuis	2021-11-16	13:00:00	4	HeatStress	1	28.6	8.06
A. cf. tenuis	2021-11-16	13:00:00	4	HeatStress	2	28.7	8.05
A. cf. tenuis	2021-11-16	13:00:00	4	HeatStress	3	28.7	8.05
A. cf. tenuis	2021-11-16	13:00:00	5	HeatStress	1	29	8.06
A. cf. tenuis	2021-11-16	13:00:00	5	HeatStress	2	29	8.06
A. cf. tenuis	2021-11-16	13:00:00	5	HeatStress	3	29	8.06
A. cf. tenuis	2021-11-16	13:00:00	6	Control	1	29.4	8.05
A. cf. tenuis	2021-11-16	13:00:00	6	Control	2	29.3	8.04
A. cf. tenuis	2021-11-16	13:00:00	6	Control	3	29.3	8.04
A. cf. tenuis	2021-11-16	13:00:00	7	HeatStress	1	28.8	8.05
A. cf. tenuis	2021-11-16	13:00:00	7	HeatStress	2	28.9	8.05
A. cf. tenuis	2021-11-16	13:00:00	7	HeatStress	3	28.8	8.05
A. cf. tenuis	2021-11-16	13:00:00	8	Control	1	28.7	8.07
A. cf. tenuis	2021-11-16	13:00:00	8	Control	2	28.7	8.07
A. cf. tenuis	2021-11-16	13:00:00	8	Control	3	28.7	8.07
A. cf. tenuis	2021-11-16	14:30:00	1	Control	1	28.7	8.04
A. cf. tenuis	2021-11-16	14:30:00	1	Control	2	28.7	8.04
A. cf. tenuis	2021-11-16	14:30:00	1	Control	3	28.6	8.04
A. cf. tenuis	2021-11-16	14:30:00	2	Control	1	28.6	7.97
A. cf. tenuis	2021-11-16	14:30:00	2	Control	2	28.5	7.97
A. cf. tenuis	2021-11-16	14:30:00	2	Control	3	28.5	7.96
A. cf. tenuis	2021-11-16	14:30:00	3	HeatStress	1	28.7	7.97
A. cf. tenuis	2021-11-16	14:30:00	3	HeatStress	2	28.7	7.97
A. cf. tenuis	2021-11-16	14:30:00	3	HeatStress	3	28.7	7.97
A. cf. tenuis	2021-11-16	14:30:00	4	HeatStress	1	28.6	7.95
A. cf. tenuis	2021-11-16	14:30:00	4	HeatStress	2	28.6	7.96
A. cf. tenuis	2021-11-16	14:30:00	4	HeatStress	3	28.6	7.96
A. cf. tenuis	2021-11-16	14:30:00	5	HeatStress	1	28.6	7.95
A. cf. tenuis	2021-11-16	14:30:00	5	HeatStress	2	28.6	7.95
A. cf. tenuis	2021-11-16	14:30:00	5	HeatStress	3	28.6	7.95
A. cf. tenuis	2021-11-16	14:30:00	6	Control	1	29	7.95
A. cf. tenuis	2021-11-16	14:30:00	6	Control	2	29	7.95
A. cf. tenuis	2021-11-16	14:30:00	6	Control	3	29	7.95
A. cf. tenuis	2021-11-16	14:30:00	7	HeatStress	1	28.8	7.93
A. cf. tenuis	2021-11-16	14:30:00	7	HeatStress	2	28.8	7.93
A. cf. tenuis	2021-11-16	14:30:00	7	HeatStress	3	28.8	7.93
A. cf. tenuis	2021-11-16	14:30:00	8	Control	1	28.7	7.9
A. cf. tenuis	2021-11-16	14:30:00	8	Control	2	28.7	7.9
A. cf. tenuis	2021-11-16	14:30:00	8	Control	3	28.7	7.91
A. cf. tenuis	2021-11-17	08:00:00	1	Control	1	28.9	8.06
A. cf. tenuis	2021-11-17	08:00:00	1	Control	2	28.9	8.06
A. cf. tenuis	2021-11-17	08:00:00	1	Control	3	28.8	8.06
A. cf. tenuis	2021-11-17	08:00:00	2	Control	1	28.9	8.04
A. cf. tenuis	2021-11-17	08:00:00	2	Control	2	28.9	8.04
A. cf. tenuis	2021-11-17	08:00:00	2	Control	3	28.8	8.04
A. cf. tenuis	2021-11-17	08:00:00	3	HeatStress	1	28.8	8.05
A. cf. tenuis	2021-11-17	08:00:00	3	HeatStress	2	28.8	8.05
A. cf. tenuis	2021-11-17	08:00:00	3	HeatStress	3	28.7	8.04
A. cf. tenuis	2021-11-17	08:00:00	4	HeatStress	1	28.6	8.04
A. cf. tenuis	2021-11-17	08:00:00	4	HeatStress	2	28.6	8.04
A. cf. tenuis	2021-11-17	08:00:00	4	HeatStress	3	28.6	8.03
A. cf. tenuis	2021-11-17	08:00:00	5	HeatStress	1	28.7	8.03
A. cf. tenuis	2021-11-17	08:00:00	5	HeatStress	2	28.7	8.03
A. cf. tenuis	2021-11-17	08:00:00	5	HeatStress	3	28.5	8.03
A. cf. tenuis	2021-11-17	08:00:00	6	Control	1	28.9	8.03
A. cf. tenuis	2021-11-17	08:00:00	6	Control	2	28.8	8.03
A. cf. tenuis	2021-11-17	08:00:00	6	Control	3	28.8	8.02
A. cf. tenuis	2021-11-17	08:00:00	7	HeatStress	1	28.8	8.06
A. cf. tenuis	2021-11-17	08:00:00	7	HeatStress	2	28.8	8.06
A. cf. tenuis	2021-11-17	08:00:00	7	HeatStress	3	28.8	8.06
A. cf. tenuis	2021-11-17	08:00:00	8	Control	1	28.6	8.04
A. cf. tenuis	2021-11-17	08:00:00	8	Control	2	28.6	8.04
A. cf. tenuis	2021-11-17	08:00:00	8	Control	3	28.5	8.04
A. cf. tenuis	2021-11-17	13:00:00	1	Control	1	28.6	8.11
A. cf. tenuis	2021-11-17	13:00:00	1	Control	2	28.7	8.11
A. cf. tenuis	2021-11-17	13:00:00	1	Control	3	28.7	8.1
A. cf. tenuis	2021-11-17	13:00:00	2	Control	1	28.8	8.08
A. cf. tenuis	2021-11-17	13:00:00	2	Control	2	28.8	8.08
A. cf. tenuis	2021-11-17	13:00:00	2	Control	3	28.7	8.08
A. cf. tenuis	2021-11-17	13:00:00	3	HeatStress	1	28.7	8.06
A. cf. tenuis	2021-11-17	13:00:00	3	HeatStress	2	28.7	8.06
A. cf. tenuis	2021-11-17	13:00:00	3	HeatStress	3	28.7	8.06
A. cf. tenuis	2021-11-17	13:00:00	4	HeatStress	1	28.7	8.05
A. cf. tenuis	2021-11-17	13:00:00	4	HeatStress	2	28.7	8.05
A. cf. tenuis	2021-11-17	13:00:00	4	HeatStress	3	28.6	8.06
A. cf. tenuis	2021-11-17	13:00:00	5	HeatStress	1	29.1	8.06
A. cf. tenuis	2021-11-17	13:00:00	5	HeatStress	2	29.1	8.06
A. cf. tenuis	2021-11-17	13:00:00	5	HeatStress	3	29.1	8.06
A. cf. tenuis	2021-11-17	13:00:00	6	Control	1	29.4	8.04
A. cf. tenuis	2021-11-17	13:00:00	6	Control	2	29.3	8.04
A. cf. tenuis	2021-11-17	13:00:00	6	Control	3	29.3	8.05
A. cf. tenuis	2021-11-17	13:00:00	7	HeatStress	1	28.8	8.05
A. cf. tenuis	2021-11-17	13:00:00	7	HeatStress	2	28.8	8.05
A. cf. tenuis	2021-11-17	13:00:00	7	HeatStress	3	28.9	8.05
A. cf. tenuis	2021-11-17	13:00:00	8	Control	1	28.7	8.07
A. cf. tenuis	2021-11-17	13:00:00	8	Control	2	28.7	8.07
A. cf. tenuis	2021-11-17	13:00:00	8	Control	3	28.7	8.07
A. cf. tenuis	2021-11-17	16:00:00	1	Control	1	28.9	8.12
A. cf. tenuis	2021-11-17	16:00:00	1	Control	2	28.9	8.14
A. cf. tenuis	2021-11-17	16:00:00	1	Control	3	28.8	8.14
A. cf. tenuis	2021-11-17	16:00:00	2	Control	1	28.8	8.04
A. cf. tenuis	2021-11-17	16:00:00	2	Control	2	28.8	8.04
A. cf. tenuis	2021-11-17	16:00:00	2	Control	3	28.7	8.05
A. cf. tenuis	2021-11-17	16:00:00	3	HeatStress	1	29.1	8.06
A. cf. tenuis	2021-11-17	16:00:00	3	HeatStress	2	29.1	8.06
A. cf. tenuis	2021-11-17	16:00:00	3	HeatStress	3	29.1	8.06
A. cf. tenuis	2021-11-17	16:00:00	4	HeatStress	1	29.2	8.05
A. cf. tenuis	2021-11-17	16:00:00	4	HeatStress	2	29.2	8.05
A. cf. tenuis	2021-11-17	16:00:00	4	HeatStress	3	29.2	8.05
A. cf. tenuis	2021-11-17	16:00:00	5	HeatStress	1	29.3	8.06
A. cf. tenuis	2021-11-17	16:00:00	5	HeatStress	2	29.3	8.06
A. cf. tenuis	2021-11-17	16:00:00	5	HeatStress	3	29.3	8.06
A. cf. tenuis	2021-11-17	16:00:00	6	Control	1	28.9	8.04
A. cf. tenuis	2021-11-17	16:00:00	6	Control	2	28.9	8.04
A. cf. tenuis	2021-11-17	16:00:00	6	Control	3	28.9	8.04
A. cf. tenuis	2021-11-17	16:00:00	7	HeatStress	1	29.7	8.11
A. cf. tenuis	2021-11-17	16:00:00	7	HeatStress	2	29.7	8.11
A. cf. tenuis	2021-11-17	16:00:00	7	HeatStress	3	29.7	8.1
A. cf. tenuis	2021-11-17	16:00:00	8	Control	1	28.6	8.1
A. cf. tenuis	2021-11-17	16:00:00	8	Control	2	28.6	8.1
A. cf. tenuis	2021-11-17	16:00:00	8	Control	3	28.6	8.11
A. cf. tenuis	2021-11-18	08:00:00	1	Control	1	28.8	8.08
A. cf. tenuis	2021-11-18	08:00:00	1	Control	2	28.8	8.08
A. cf. tenuis	2021-11-18	08:00:00	1	Control	3	28.6	8.09
A. cf. tenuis	2021-11-18	08:00:00	2	Control	1	28.9	8.09
A. cf. tenuis	2021-11-18	08:00:00	2	Control	2	28.9	8.09
A. cf. tenuis	2021-11-18	08:00:00	2	Control	3	28.7	8.09
A. cf. tenuis	2021-11-18	08:00:00	3	HeatStress	1	30.1	8.06
A. cf. tenuis	2021-11-18	08:00:00	3	HeatStress	2	30.1	8.06
A. cf. tenuis	2021-11-18	08:00:00	3	HeatStress	3	30	8.05
A. cf. tenuis	2021-11-18	08:00:00	4	HeatStress	1	30	8.05
A. cf. tenuis	2021-11-18	08:00:00	4	HeatStress	2	30	8.05
A. cf. tenuis	2021-11-18	08:00:00	4	HeatStress	3	29.9	8.04
A. cf. tenuis	2021-11-18	08:00:00	5	HeatStress	1	30.1	8.03
A. cf. tenuis	2021-11-18	08:00:00	5	HeatStress	2	30.1	8.03
A. cf. tenuis	2021-11-18	08:00:00	5	HeatStress	3	30	8.03
A. cf. tenuis	2021-11-18	08:00:00	6	Control	1	28.9	8.03
A. cf. tenuis	2021-11-18	08:00:00	6	Control	2	28.9	8.03
A. cf. tenuis	2021-11-18	08:00:00	6	Control	3	28.9	8.03
A. cf. tenuis	2021-11-18	08:00:00	7	HeatStress	1	30.2	8.06
A. cf. tenuis	2021-11-18	08:00:00	7	HeatStress	2	30.2	8.06
A. cf. tenuis	2021-11-18	08:00:00	7	HeatStress	3	30.2	8.06
A. cf. tenuis	2021-11-18	08:00:00	8	Control	1	28.7	8.05
A. cf. tenuis	2021-11-18	08:00:00	8	Control	2	28.7	8.05
A. cf. tenuis	2021-11-18	08:00:00	8	Control	3	28.7	8.05
A. cf. tenuis	2021-11-18	13:00:00	1	Control	1	28.7	8.12
A. cf. tenuis	2021-11-18	13:00:00	1	Control	2	28.7	8.13
A. cf. tenuis	2021-11-18	13:00:00	1	Control	3	28.5	8.13
A. cf. tenuis	2021-11-18	13:00:00	2	Control	1	28.9	8.09
A. cf. tenuis	2021-11-18	13:00:00	2	Control	2	28.9	8.09
A. cf. tenuis	2021-11-18	13:00:00	2	Control	3	28.8	8.09
A. cf. tenuis	2021-11-18	13:00:00	3	HeatStress	1	30.2	8.06
A. cf. tenuis	2021-11-18	13:00:00	3	HeatStress	2	30	8.06
A. cf. tenuis	2021-11-18	13:00:00	3	HeatStress	3	30	8.06
A. cf. tenuis	2021-11-18	13:00:00	4	HeatStress	1	30	8.04
A. cf. tenuis	2021-11-18	13:00:00	4	HeatStress	2	30.3	8.04
A. cf. tenuis	2021-11-18	13:00:00	4	HeatStress	3	30	8.04
A. cf. tenuis	2021-11-18	13:00:00	5	HeatStress	1	30	8.05
A. cf. tenuis	2021-11-18	13:00:00	5	HeatStress	2	30	8.05
A. cf. tenuis	2021-11-18	13:00:00	5	HeatStress	3	30	8.05
A. cf. tenuis	2021-11-18	13:00:00	6	Control	1	28.7	8.05
A. cf. tenuis	2021-11-18	13:00:00	6	Control	2	28.7	8.05
A. cf. tenuis	2021-11-18	13:00:00	6	Control	3	28.7	8.05
A. cf. tenuis	2021-11-18	13:00:00	7	HeatStress	1	30.5	8.08
A. cf. tenuis	2021-11-18	13:00:00	7	HeatStress	2	30.5	8.08
A. cf. tenuis	2021-11-18	13:00:00	7	HeatStress	3	30.6	8.07
A. cf. tenuis	2021-11-18	13:00:00	8	Control	1	28.6	8.08
A. cf. tenuis	2021-11-18	13:00:00	8	Control	2	28.6	8.08
A. cf. tenuis	2021-11-18	13:00:00	8	Control	3	28.6	8.08
A. cf. tenuis	2021-11-18	16:00:00	1	Control	1	28.7	8.11
A. cf. tenuis	2021-11-18	16:00:00	1	Control	2	28.7	8.11
A. cf. tenuis	2021-11-18	16:00:00	1	Control	3	28.7	8.13
A. cf. tenuis	2021-11-18	16:00:00	2	Control	1	29	8.06
A. cf. tenuis	2021-11-18	16:00:00	2	Control	2	28.9	8.06
A. cf. tenuis	2021-11-18	16:00:00	2	Control	3	28.9	8.06
A. cf. tenuis	2021-11-18	16:00:00	3	HeatStress	1	30.1	8.06
A. cf. tenuis	2021-11-18	16:00:00	3	HeatStress	2	30.1	8.06
A. cf. tenuis	2021-11-18	16:00:00	3	HeatStress	3	30.1	8.05
A. cf. tenuis	2021-11-18	16:00:00	4	HeatStress	1	30	8.04
A. cf. tenuis	2021-11-18	16:00:00	4	HeatStress	2	30	8.03
A. cf. tenuis	2021-11-18	16:00:00	4	HeatStress	3	30	8.03
A. cf. tenuis	2021-11-18	16:00:00	5	HeatStress	1	30.1	8.04
A. cf. tenuis	2021-11-18	16:00:00	5	HeatStress	2	30.1	8.04
A. cf. tenuis	2021-11-18	16:00:00	5	HeatStress	3	30	8.04
A. cf. tenuis	2021-11-18	16:00:00	6	Control	1	29.1	8.02
A. cf. tenuis	2021-11-18	16:00:00	6	Control	2	29.1	8.01
A. cf. tenuis	2021-11-18	16:00:00	6	Control	3	29.1	8.01
A. cf. tenuis	2021-11-18	16:00:00	7	HeatStress	1	30.1	8.07
A. cf. tenuis	2021-11-18	16:00:00	7	HeatStress	2	30.1	8.07
A. cf. tenuis	2021-11-18	16:00:00	7	HeatStress	3	30	8.07
A. cf. tenuis	2021-11-18	16:00:00	8	Control	1	28.7	8.07
A. cf. tenuis	2021-11-18	16:00:00	8	Control	2	28.7	8.07
A. cf. tenuis	2021-11-18	16:00:00	8	Control	3	28.6	8.06
A. cf. tenuis	2021-11-19	09:00:00	1	Control	1	28.7	8.08
A. cf. tenuis	2021-11-19	09:00:00	1	Control	2	28.7	8.08
A. cf. tenuis	2021-11-19	09:00:00	1	Control	3	28.7	8.09
A. cf. tenuis	2021-11-19	09:00:00	2	Control	1	28.5	8.07
A. cf. tenuis	2021-11-19	09:00:00	2	Control	2	28.5	8.07
A. cf. tenuis	2021-11-19	09:00:00	2	Control	3	28.6	8.07
A. cf. tenuis	2021-11-19	09:00:00	3	HeatStress	1	31.2	8.05
A. cf. tenuis	2021-11-19	09:00:00	3	HeatStress	2	31.2	8.05
A. cf. tenuis	2021-11-19	09:00:00	3	HeatStress	3	31.2	8.05
A. cf. tenuis	2021-11-19	09:00:00	4	HeatStress	1	30.9	8.03
A. cf. tenuis	2021-11-19	09:00:00	4	HeatStress	2	30.9	8.03
A. cf. tenuis	2021-11-19	09:00:00	4	HeatStress	3	30.9	8.05
A. cf. tenuis	2021-11-19	09:00:00	5	HeatStress	1	31	8.05
A. cf. tenuis	2021-11-19	09:00:00	5	HeatStress	2	31	8.05
A. cf. tenuis	2021-11-19	09:00:00	5	HeatStress	3	30.9	8.04
A. cf. tenuis	2021-11-19	09:00:00	6	Control	1	28.9	8.05
A. cf. tenuis	2021-11-19	09:00:00	6	Control	2	28.9	8.05
A. cf. tenuis	2021-11-19	09:00:00	6	Control	3	28.8	8.05
A. cf. tenuis	2021-11-19	09:00:00	7	HeatStress	1	31	8.06
A. cf. tenuis	2021-11-19	09:00:00	7	HeatStress	2	31	8.06
A. cf. tenuis	2021-11-19	09:00:00	7	HeatStress	3	30.9	8.07
A. cf. tenuis	2021-11-19	09:00:00	8	Control	1	28.7	8.06
A. cf. tenuis	2021-11-19	09:00:00	8	Control	2	28.7	8.06
A. cf. tenuis	2021-11-19	09:00:00	8	Control	3	28.7	8.06
A. cf. tenuis	2021-11-19	13:00:00	1	Control	1	28.9	8.1
A. cf. tenuis	2021-11-19	13:00:00	1	Control	2	28.9	8.1
A. cf. tenuis	2021-11-19	13:00:00	1	Control	3	28.7	8.11
A. cf. tenuis	2021-11-19	13:00:00	2	Control	1	28.8	8.12
A. cf. tenuis	2021-11-19	13:00:00	2	Control	2	28.8	8.12
A. cf. tenuis	2021-11-19	13:00:00	2	Control	3	28.7	8.12
A. cf. tenuis	2021-11-19	13:00:00	3	HeatStress	1	31.2	8.1
A. cf. tenuis	2021-11-19	13:00:00	3	HeatStress	2	31.2	8.1
A. cf. tenuis	2021-11-19	13:00:00	3	HeatStress	3	31.1	8.11
A. cf. tenuis	2021-11-19	13:00:00	4	HeatStress	1	30.9	8.09
A. cf. tenuis	2021-11-19	13:00:00	4	HeatStress	2	30.9	8.09
A. cf. tenuis	2021-11-19	13:00:00	4	HeatStress	3	30.9	8.08
A. cf. tenuis	2021-11-19	13:00:00	5	HeatStress	1	31.1	8.1
A. cf. tenuis	2021-11-19	13:00:00	5	HeatStress	2	31.1	8.1
A. cf. tenuis	2021-11-19	13:00:00	5	HeatStress	3	31.1	8.09
A. cf. tenuis	2021-11-19	13:00:00	6	Control	1	28.8	8.08
A. cf. tenuis	2021-11-19	13:00:00	6	Control	2	28.9	8.08
A. cf. tenuis	2021-11-19	13:00:00	6	Control	3	28.9	8.09
A. cf. tenuis	2021-11-19	13:00:00	7	HeatStress	1	31.1	8.1
A. cf. tenuis	2021-11-19	13:00:00	7	HeatStress	2	31.1	8.11
A. cf. tenuis	2021-11-19	13:00:00	7	HeatStress	3	31.1	8.11
A. cf. tenuis	2021-11-19	13:00:00	8	Control	1	28.7	8.1
A. cf. tenuis	2021-11-19	13:00:00	8	Control	2	28.7	8.1
A. cf. tenuis	2021-11-19	13:00:00	8	Control	3	28.6	8.11
A. cf. tenuis	2021-11-19	16:30:00	1	Control	1	28.6	8.15
A. cf. tenuis	2021-11-19	16:30:00	1	Control	2	28.6	8.15
A. cf. tenuis	2021-11-19	16:30:00	1	Control	3	28.6	8.16
A. cf. tenuis	2021-11-19	16:30:00	2	Control	1	28.6	8.1
A. cf. tenuis	2021-11-19	16:30:00	2	Control	2	28.5	8.1
A. cf. tenuis	2021-11-19	16:30:00	2	Control	3	28.5	8.11
A. cf. tenuis	2021-11-19	16:30:00	3	HeatStress	1	31.2	8.11
A. cf. tenuis	2021-11-19	16:30:00	3	HeatStress	2	31.2	8.11
A. cf. tenuis	2021-11-19	16:30:00	3	HeatStress	3	31.2	8.11
A. cf. tenuis	2021-11-19	16:30:00	4	HeatStress	1	30.9	8.09
A. cf. tenuis	2021-11-19	16:30:00	4	HeatStress	2	30.9	8.09
A. cf. tenuis	2021-11-19	16:30:00	4	HeatStress	3	30.9	8.09
A. cf. tenuis	2021-11-19	16:30:00	5	HeatStress	1	31.1	8.09
A. cf. tenuis	2021-11-19	16:30:00	5	HeatStress	2	31.1	8.09
A. cf. tenuis	2021-11-19	16:30:00	5	HeatStress	3	31	8.09
A. cf. tenuis	2021-11-19	16:30:00	6	Control	1	29	8.08
A. cf. tenuis	2021-11-19	16:30:00	6	Control	2	29	8.08
A. cf. tenuis	2021-11-19	16:30:00	6	Control	3	29	8.08
A. cf. tenuis	2021-11-19	16:30:00	7	HeatStress	1	31.2	8.08
A. cf. tenuis	2021-11-19	16:30:00	7	HeatStress	2	31.2	8.09
A. cf. tenuis	2021-11-19	16:30:00	7	HeatStress	3	31.1	8.09
A. cf. tenuis	2021-11-19	16:30:00	8	Control	1	28.8	8.09
A. cf. tenuis	2021-11-19	16:30:00	8	Control	2	28.9	8.08
A. cf. tenuis	2021-11-19	16:30:00	8	Control	3	28.8	8.08
A. cf. tenuis	2021-11-20	08:30:00	1	Control	1	28.9	8.09
A. cf. tenuis	2021-11-20	08:30:00	1	Control	2	28.9	8.08
A. cf. tenuis	2021-11-20	08:30:00	1	Control	3	28.8	8.08
A. cf. tenuis	2021-11-20	08:30:00	2	Control	1	28.8	8.08
A. cf. tenuis	2021-11-20	08:30:00	2	Control	2	28.8	8.08
A. cf. tenuis	2021-11-20	08:30:00	2	Control	3	28.8	8.08
A. cf. tenuis	2021-11-20	08:30:00	3	HeatStress	1	32.1	8.04
A. cf. tenuis	2021-11-20	08:30:00	3	HeatStress	2	32.1	8.04
A. cf. tenuis	2021-11-20	08:30:00	3	HeatStress	3	32	8.04
A. cf. tenuis	2021-11-20	08:30:00	4	HeatStress	1	32	8.03
A. cf. tenuis	2021-11-20	08:30:00	4	HeatStress	2	32	8.03
A. cf. tenuis	2021-11-20	08:30:00	4	HeatStress	3	31.9	8.02
A. cf. tenuis	2021-11-20	08:30:00	5	HeatStress	1	31.9	8.03
A. cf. tenuis	2021-11-20	08:30:00	5	HeatStress	2	31.9	8.03
A. cf. tenuis	2021-11-20	08:30:00	5	HeatStress	3	31.8	8.03
A. cf. tenuis	2021-11-20	08:30:00	6	Control	1	28.8	8.03
A. cf. tenuis	2021-11-20	08:30:00	6	Control	2	28.8	8.03
A. cf. tenuis	2021-11-20	08:30:00	6	Control	3	28.6	8.03
A. cf. tenuis	2021-11-20	08:30:00	7	HeatStress	1	32.1	8.04
A. cf. tenuis	2021-11-20	08:30:00	7	HeatStress	2	32	8.05
A. cf. tenuis	2021-11-20	08:30:00	7	HeatStress	3	32	8.05
A. cf. tenuis	2021-11-20	08:30:00	8	Control	1	28.6	8.05
A. cf. tenuis	2021-11-20	08:30:00	8	Control	2	28.6	8.05
A. cf. tenuis	2021-11-20	08:30:00	8	Control	3	28.5	8.05
A. cf. tenuis	2021-11-20	13:00:00	1	Control	1	28.8	8.16
A. cf. tenuis	2021-11-20	13:00:00	1	Control	2	28.8	8.16
A. cf. tenuis	2021-11-20	13:00:00	1	Control	3	28.6	8.17
A. cf. tenuis	2021-11-20	13:00:00	2	Control	1	28.6	8.13
A. cf. tenuis	2021-11-20	13:00:00	2	Control	2	28.6	8.13
A. cf. tenuis	2021-11-20	13:00:00	2	Control	3	28.5	8.13
A. cf. tenuis	2021-11-20	13:00:00	3	HeatStress	1	32.2	8.12
A. cf. tenuis	2021-11-20	13:00:00	3	HeatStress	2	32.2	8.12
A. cf. tenuis	2021-11-20	13:00:00	3	HeatStress	3	32.2	8.12
A. cf. tenuis	2021-11-20	13:00:00	4	HeatStress	1	31.9	8.09
A. cf. tenuis	2021-11-20	13:00:00	4	HeatStress	2	31.9	8.09
A. cf. tenuis	2021-11-20	13:00:00	4	HeatStress	3	31.9	8.09
A. cf. tenuis	2021-11-20	13:00:00	5	HeatStress	1	32	8.11
A. cf. tenuis	2021-11-20	13:00:00	5	HeatStress	2	32	8.11
A. cf. tenuis	2021-11-20	13:00:00	5	HeatStress	3	32	8.12
A. cf. tenuis	2021-11-20	13:00:00	6	Control	1	28.8	8.11
A. cf. tenuis	2021-11-20	13:00:00	6	Control	2	28.9	8.11
A. cf. tenuis	2021-11-20	13:00:00	6	Control	3	28.9	8.1
A. cf. tenuis	2021-11-20	13:00:00	7	HeatStress	1	32	8.12
A. cf. tenuis	2021-11-20	13:00:00	7	HeatStress	2	32	8.12
A. cf. tenuis	2021-11-20	13:00:00	7	HeatStress	3	31.9	8.12
A. cf. tenuis	2021-11-20	13:00:00	8	Control	1	28.7	8.12
A. cf. tenuis	2021-11-20	13:00:00	8	Control	2	28.7	8.12
A. cf. tenuis	2021-11-20	13:00:00	8	Control	3	28.7	8.12
A. cf. tenuis	2021-11-20	17:00:00	1	Control	1	28.8	8.16
A. cf. tenuis	2021-11-20	17:00:00	1	Control	2	28.8	8.18
A. cf. tenuis	2021-11-20	17:00:00	1	Control	3	28.7	8.18
A. cf. tenuis	2021-11-20	17:00:00	2	Control	1	28.7	8.12
A. cf. tenuis	2021-11-20	17:00:00	2	Control	2	28.7	8.12
A. cf. tenuis	2021-11-20	17:00:00	2	Control	3	28.7	8.11
A. cf. tenuis	2021-11-20	17:00:00	3	HeatStress	1	32.3	8.11
A. cf. tenuis	2021-11-20	17:00:00	3	HeatStress	2	32.3	8.11
A. cf. tenuis	2021-11-20	17:00:00	3	HeatStress	3	32.3	8.11
A. cf. tenuis	2021-11-20	17:00:00	4	HeatStress	1	32	8.09
A. cf. tenuis	2021-11-20	17:00:00	4	HeatStress	2	32	8.08
A. cf. tenuis	2021-11-20	17:00:00	4	HeatStress	3	32	8.09
A. cf. tenuis	2021-11-20	17:00:00	5	HeatStress	1	32.3	8.09
A. cf. tenuis	2021-11-20	17:00:00	5	HeatStress	2	32.2	8.1
A. cf. tenuis	2021-11-20	17:00:00	5	HeatStress	3	32.2	8.09
A. cf. tenuis	2021-11-20	17:00:00	6	Control	1	29.5	8.08
A. cf. tenuis	2021-11-20	17:00:00	6	Control	2	29.4	8.08
A. cf. tenuis	2021-11-20	17:00:00	6	Control	3	29.4	8.08
A. cf. tenuis	2021-11-20	17:00:00	7	HeatStress	1	32.5	8.1
A. cf. tenuis	2021-11-20	17:00:00	7	HeatStress	2	32.6	8.11
A. cf. tenuis	2021-11-20	17:00:00	7	HeatStress	3	32.5	8.11
A. cf. tenuis	2021-11-20	17:00:00	8	Control	1	28.5	8.11
A. cf. tenuis	2021-11-20	17:00:00	8	Control	2	28.6	8.11
A. cf. tenuis	2021-11-20	17:00:00	8	Control	3	28.6	8.11
A. cf. tenuis	2021-11-21	08:50:00	1	Control	1	28.9	8.08
A. cf. tenuis	2021-11-21	08:50:00	1	Control	2	28.9	8.08
A. cf. tenuis	2021-11-21	08:50:00	1	Control	3	28.8	8.09
A. cf. tenuis	2021-11-21	08:50:00	2	Control	1	28.6	8.06
A. cf. tenuis	2021-11-21	08:50:00	2	Control	2	28.6	8.06
A. cf. tenuis	2021-11-21	08:50:00	2	Control	3	28.4	8.07
A. cf. tenuis	2021-11-21	08:50:00	3	HeatStress	1	33.2	8.04
A. cf. tenuis	2021-11-21	08:50:00	3	HeatStress	2	33.2	8.04
A. cf. tenuis	2021-11-21	08:50:00	3	HeatStress	3	33.2	8.04
A. cf. tenuis	2021-11-21	08:50:00	4	HeatStress	1	32.9	8.03
A. cf. tenuis	2021-11-21	08:50:00	4	HeatStress	2	32.9	8.03
A. cf. tenuis	2021-11-21	08:50:00	4	HeatStress	3	32.9	8.03
A. cf. tenuis	2021-11-21	08:50:00	5	HeatStress	1	33.1	8.03
A. cf. tenuis	2021-11-21	08:50:00	5	HeatStress	2	33	8.03
A. cf. tenuis	2021-11-21	08:50:00	5	HeatStress	3	33.1	8.03
A. cf. tenuis	2021-11-21	08:50:00	6	Control	1	29	8.03
A. cf. tenuis	2021-11-21	08:50:00	6	Control	2	29	8.03
A. cf. tenuis	2021-11-21	08:50:00	6	Control	3	29	8.03
A. cf. tenuis	2021-11-21	08:50:00	7	HeatStress	1	32.9	8.03
A. cf. tenuis	2021-11-21	08:50:00	7	HeatStress	2	32.9	8.03
A. cf. tenuis	2021-11-21	08:50:00	7	HeatStress	3	33.1	8.03
A. cf. tenuis	2021-11-21	08:50:00	8	Control	1	28.8	8.03
A. cf. tenuis	2021-11-21	08:50:00	8	Control	2	28.8	8.03
A. cf. tenuis	2021-11-21	08:50:00	8	Control	3	28.7	8.04
A. cf. tenuis	2021-11-21	13:00:00	1	Control	1	28.7	8.14
A. cf. tenuis	2021-11-21	13:00:00	1	Control	2	28.7	8.14
A. cf. tenuis	2021-11-21	13:00:00	1	Control	3	28.6	8.15
A. cf. tenuis	2021-11-21	13:00:00	2	Control	1	28.7	8.13
A. cf. tenuis	2021-11-21	13:00:00	2	Control	2	28.7	8.13
A. cf. tenuis	2021-11-21	13:00:00	2	Control	3	28.7	8.13
A. cf. tenuis	2021-11-21	13:00:00	3	HeatStress	1	33.3	8.11
A. cf. tenuis	2021-11-21	13:00:00	3	HeatStress	2	33.3	8.11
A. cf. tenuis	2021-11-21	13:00:00	3	HeatStress	3	33.3	8.12
A. cf. tenuis	2021-11-21	13:00:00	4	HeatStress	1	33	8.09
A. cf. tenuis	2021-11-21	13:00:00	4	HeatStress	2	33	8.09
A. cf. tenuis	2021-11-21	13:00:00	4	HeatStress	3	32.9	8.09
A. cf. tenuis	2021-11-21	13:00:00	5	HeatStress	1	33.1	8.1
A. cf. tenuis	2021-11-21	13:00:00	5	HeatStress	2	33.1	8.1
A. cf. tenuis	2021-11-21	13:00:00	5	HeatStress	3	33	8.1
A. cf. tenuis	2021-11-21	13:00:00	6	Control	1	28.9	8.09
A. cf. tenuis	2021-11-21	13:00:00	6	Control	2	28.9	8.09
A. cf. tenuis	2021-11-21	13:00:00	6	Control	3	28.9	8.09
A. cf. tenuis	2021-11-21	13:00:00	7	HeatStress	1	33	8.1
A. cf. tenuis	2021-11-21	13:00:00	7	HeatStress	2	33	8.1
A. cf. tenuis	2021-11-21	13:00:00	7	HeatStress	3	33	8.11
A. cf. tenuis	2021-11-21	13:00:00	8	Control	1	28.6	8.12
A. cf. tenuis	2021-11-21	13:00:00	8	Control	2	28.6	8.12
A. cf. tenuis	2021-11-21	13:00:00	8	Control	3	28.6	8.13
A. cf. tenuis	2021-11-21	17:00:00	1	Control	1	28.6	8.17
A. cf. tenuis	2021-11-21	17:00:00	1	Control	2	28.6	8.17
A. cf. tenuis	2021-11-21	17:00:00	1	Control	3	28.7	8.16
A. cf. tenuis	2021-11-21	17:00:00	2	Control	1	28.8	8.13
A. cf. tenuis	2021-11-21	17:00:00	2	Control	2	28.8	8.13
A. cf. tenuis	2021-11-21	17:00:00	2	Control	3	28.8	8.14
A. cf. tenuis	2021-11-21	17:00:00	3	HeatStress	1	33.2	8.11
A. cf. tenuis	2021-11-21	17:00:00	3	HeatStress	2	33.2	8.11
A. cf. tenuis	2021-11-21	17:00:00	3	HeatStress	3	33.2	8.11
A. cf. tenuis	2021-11-21	17:00:00	4	HeatStress	1	33	8.09
A. cf. tenuis	2021-11-21	17:00:00	4	HeatStress	2	33	8.09
A. cf. tenuis	2021-11-21	17:00:00	4	HeatStress	3	32.9	8.08
A. cf. tenuis	2021-11-21	17:00:00	5	HeatStress	1	33.1	8.09
A. cf. tenuis	2021-11-21	17:00:00	5	HeatStress	2	33.1	8.09
A. cf. tenuis	2021-11-21	17:00:00	5	HeatStress	3	33	8.09
A. cf. tenuis	2021-11-21	17:00:00	6	Control	1	29.1	8.09
A. cf. tenuis	2021-11-21	17:00:00	6	Control	2	29.1	8.09
A. cf. tenuis	2021-11-21	17:00:00	6	Control	3	29	8.09
A. cf. tenuis	2021-11-21	17:00:00	7	HeatStress	1	33.2	8.1
A. cf. tenuis	2021-11-21	17:00:00	7	HeatStress	2	33.3	8.1
A. cf. tenuis	2021-11-21	17:00:00	7	HeatStress	3	33.3	8.09
A. cf. tenuis	2021-11-21	17:00:00	8	Control	1	28.7	8.11
A. cf. tenuis	2021-11-21	17:00:00	8	Control	2	28.7	8.11
A. cf. tenuis	2021-11-21	17:00:00	8	Control	3	28.7	8.11
A. cf. tenuis	2021-11-22	10:30:00	1	Control	1	28.5	8.06
A. cf. tenuis	2021-11-22	10:30:00	1	Control	2	28.5	8.06
A. cf. tenuis	2021-11-22	10:30:00	1	Control	3	28.5	8.06
A. cf. tenuis	2021-11-22	10:30:00	2	Control	1	28.9	8.06
A. cf. tenuis	2021-11-22	10:30:00	2	Control	2	28.9	8.06
A. cf. tenuis	2021-11-22	10:30:00	2	Control	3	28.7	8.06
A. cf. tenuis	2021-11-22	10:30:00	3	HeatStress	1	33.4	8.04
A. cf. tenuis	2021-11-22	10:30:00	3	HeatStress	2	33.4	8.04
A. cf. tenuis	2021-11-22	10:30:00	3	HeatStress	3	33.2	8.04
A. cf. tenuis	2021-11-22	10:30:00	4	HeatStress	1	32.9	8.03
A. cf. tenuis	2021-11-22	10:30:00	4	HeatStress	2	32.9	8.03
A. cf. tenuis	2021-11-22	10:30:00	4	HeatStress	3	32.9	8.03
A. cf. tenuis	2021-11-22	10:30:00	5	HeatStress	1	32.9	8.04
A. cf. tenuis	2021-11-22	10:30:00	5	HeatStress	2	32.9	8.04
A. cf. tenuis	2021-11-22	10:30:00	5	HeatStress	3	32.9	8.04
A. cf. tenuis	2021-11-22	10:30:00	6	Control	1	28.6	8.05
A. cf. tenuis	2021-11-22	10:30:00	6	Control	2	28.6	8.05
A. cf. tenuis	2021-11-22	10:30:00	6	Control	3	28.8	8.04
A. cf. tenuis	2021-11-22	10:30:00	7	HeatStress	1	33.4	8.02
A. cf. tenuis	2021-11-22	10:30:00	7	HeatStress	2	33.4	8.02
A. cf. tenuis	2021-11-22	10:30:00	7	HeatStress	3	33.4	8.02
A. cf. tenuis	2021-11-22	10:30:00	8	Control	1	28.6	8.06
A. cf. tenuis	2021-11-22	10:30:00	8	Control	2	28.6	8.06
A. cf. tenuis	2021-11-22	10:30:00	8	Control	3	28.8	8.05
A. cf. tenuis	2021-11-22	13:00:00	1	Control	1	28.7	8.14
A. cf. tenuis	2021-11-22	13:00:00	1	Control	2	28.7	8.14
A. cf. tenuis	2021-11-22	13:00:00	1	Control	3	28.6	8.15
A. cf. tenuis	2021-11-22	13:00:00	2	Control	1	28.8	8.16
A. cf. tenuis	2021-11-22	13:00:00	2	Control	2	28.8	8.16
A. cf. tenuis	2021-11-22	13:00:00	2	Control	3	28.8	8.16
A. cf. tenuis	2021-11-22	13:00:00	3	HeatStress	1	33.2	8.16
A. cf. tenuis	2021-11-22	13:00:00	3	HeatStress	2	33.2	8.16
A. cf. tenuis	2021-11-22	13:00:00	3	HeatStress	3	33.1	8.16
A. cf. tenuis	2021-11-22	13:00:00	4	HeatStress	1	33	8.13
A. cf. tenuis	2021-11-22	13:00:00	4	HeatStress	2	33	8.13
A. cf. tenuis	2021-11-22	13:00:00	4	HeatStress	3	32.9	8.13
A. cf. tenuis	2021-11-22	13:00:00	5	HeatStress	1	33	8.13
A. cf. tenuis	2021-11-22	13:00:00	5	HeatStress	2	33	8.13
A. cf. tenuis	2021-11-22	13:00:00	5	HeatStress	3	33	8.13
A. cf. tenuis	2021-11-22	13:00:00	6	Control	1	28.7	8.12
A. cf. tenuis	2021-11-22	13:00:00	6	Control	2	28.7	8.13
A. cf. tenuis	2021-11-22	13:00:00	6	Control	3	28.7	8.13
A. cf. tenuis	2021-11-22	13:00:00	7	HeatStress	1	33.4	8.12
A. cf. tenuis	2021-11-22	13:00:00	7	HeatStress	2	33.4	8.11
A. cf. tenuis	2021-11-22	13:00:00	7	HeatStress	3	33.2	8.11
A. cf. tenuis	2021-11-22	13:00:00	8	Control	1	28.8	8.12
A. cf. tenuis	2021-11-22	13:00:00	8	Control	2	28.8	8.12
A. cf. tenuis	2021-11-22	13:00:00	8	Control	3	28.8	8.12
A. cf. tenuis	2021-11-22	17:00:00	1	Control	1	28.7	8.07
A. cf. tenuis	2021-11-22	17:00:00	1	Control	2	28.7	8.07
A. cf. tenuis	2021-11-22	17:00:00	1	Control	3	28.6	8.07
A. cf. tenuis	2021-11-22	17:00:00	2	Control	1	29	8.15
A. cf. tenuis	2021-11-22	17:00:00	2	Control	2	29	8.15
A. cf. tenuis	2021-11-22	17:00:00	2	Control	3	28.9	8.15
A. cf. tenuis	2021-11-22	17:00:00	3	HeatStress	1	33.2	8.17
A. cf. tenuis	2021-11-22	17:00:00	3	HeatStress	2	33.2	8.17
A. cf. tenuis	2021-11-22	17:00:00	3	HeatStress	3	33.1	8.17
A. cf. tenuis	2021-11-22	17:00:00	4	HeatStress	1	32.9	8.13
A. cf. tenuis	2021-11-22	17:00:00	4	HeatStress	2	32.9	8.13
A. cf. tenuis	2021-11-22	17:00:00	4	HeatStress	3	32.9	8.13
A. cf. tenuis	2021-11-22	17:00:00	5	HeatStress	1	32.9	8.13
A. cf. tenuis	2021-11-22	17:00:00	5	HeatStress	2	32.9	8.13
A. cf. tenuis	2021-11-22	17:00:00	5	HeatStress	3	32.9	8.13
A. cf. tenuis	2021-11-22	17:00:00	6	Control	1	28.9	8.14
A. cf. tenuis	2021-11-22	17:00:00	6	Control	2	28.9	8.14
A. cf. tenuis	2021-11-22	17:00:00	6	Control	3	28.9	8.14
A. cf. tenuis	2021-11-22	17:00:00	7	HeatStress	1	33.4	8.14
A. cf. tenuis	2021-11-22	17:00:00	7	HeatStress	2	33.4	8.14
A. cf. tenuis	2021-11-22	17:00:00	7	HeatStress	3	33.4	8.13
A. cf. tenuis	2021-11-22	17:00:00	8	Control	1	28.6	8.15
A. cf. tenuis	2021-11-22	17:00:00	8	Control	2	28.6	8.15
A. cf. tenuis	2021-11-22	17:00:00	8	Control	3	28.6	8.15
A. cf. tenuis	2021-11-23	08:00:00	1	Control	1	28.8	8.07
A. cf. tenuis	2021-11-23	08:00:00	1	Control	2	28.8	8.07
A. cf. tenuis	2021-11-23	08:00:00	1	Control	3	28.8	8.07
A. cf. tenuis	2021-11-23	08:00:00	2	Control	1	28.6	8.06
A. cf. tenuis	2021-11-23	08:00:00	2	Control	2	28.6	8.06
A. cf. tenuis	2021-11-23	08:00:00	2	Control	3	28.6	8.06
A. cf. tenuis	2021-11-23	08:00:00	3	HeatStress	1	33.2	8.02
A. cf. tenuis	2021-11-23	08:00:00	3	HeatStress	2	33.2	8.02
A. cf. tenuis	2021-11-23	08:00:00	3	HeatStress	3	33.2	8.02
A. cf. tenuis	2021-11-23	08:00:00	4	HeatStress	1	33	8.02
A. cf. tenuis	2021-11-23	08:00:00	4	HeatStress	2	33	8.02
A. cf. tenuis	2021-11-23	08:00:00	4	HeatStress	3	33	8.02
A. cf. tenuis	2021-11-23	08:00:00	5	HeatStress	1	33.2	8.01
A. cf. tenuis	2021-11-23	08:00:00	5	HeatStress	2	33.2	8.01
A. cf. tenuis	2021-11-23	08:00:00	5	HeatStress	3	33.2	8.01
A. cf. tenuis	2021-11-23	08:00:00	6	Control	1	28.9	8.03
A. cf. tenuis	2021-11-23	08:00:00	6	Control	2	28.9	8.03
A. cf. tenuis	2021-11-23	08:00:00	6	Control	3	28.9	8.03
A. cf. tenuis	2021-11-23	08:00:00	7	HeatStress	1	33.3	8.02
A. cf. tenuis	2021-11-23	08:00:00	7	HeatStress	2	33.3	8.02
A. cf. tenuis	2021-11-23	08:00:00	7	HeatStress	3	33.3	8.02
A. cf. tenuis	2021-11-23	08:00:00	8	Control	1	28.8	8.05
A. cf. tenuis	2021-11-23	08:00:00	8	Control	2	28.8	8.05
A. cf. tenuis	2021-11-23	08:00:00	8	Control	3	28.8	8.05
A. cf. tenuis	2021-11-23	13:00:00	1	Control	1	28.9	8.08
A. cf. tenuis	2021-11-23	13:00:00	1	Control	2	28.9	8.08
A. cf. tenuis	2021-11-23	13:00:00	1	Control	3	28.8	8.07
A. cf. tenuis	2021-11-23	13:00:00	2	Control	1	28.8	8.18
A. cf. tenuis	2021-11-23	13:00:00	2	Control	2	28.8	8.18
A. cf. tenuis	2021-11-23	13:00:00	2	Control	3	28.7	8.18
A. cf. tenuis	2021-11-23	13:00:00	3	HeatStress	1	33.2	8.18
A. cf. tenuis	2021-11-23	13:00:00	3	HeatStress	2	33.2	8.18
A. cf. tenuis	2021-11-23	13:00:00	3	HeatStress	3	33.1	8.18
A. cf. tenuis	2021-11-23	13:00:00	4	HeatStress	1	32.9	8.15
A. cf. tenuis	2021-11-23	13:00:00	4	HeatStress	2	32.9	8.15
A. cf. tenuis	2021-11-23	13:00:00	4	HeatStress	3	32.9	8.15
A. cf. tenuis	2021-11-23	13:00:00	5	HeatStress	1	33.1	8.15
A. cf. tenuis	2021-11-23	13:00:00	5	HeatStress	2	33.1	8.15
A. cf. tenuis	2021-11-23	13:00:00	5	HeatStress	3	33	8.15
A. cf. tenuis	2021-11-23	13:00:00	6	Control	1	29.3	8.16
A. cf. tenuis	2021-11-23	13:00:00	6	Control	2	29.3	8.16
A. cf. tenuis	2021-11-23	13:00:00	6	Control	3	29.4	8.15
A. cf. tenuis	2021-11-23	13:00:00	7	HeatStress	1	33.3	8.16
A. cf. tenuis	2021-11-23	13:00:00	7	HeatStress	2	33.3	8.16
A. cf. tenuis	2021-11-23	13:00:00	7	HeatStress	3	33.3	8.16
A. cf. tenuis	2021-11-23	13:00:00	8	Control	1	28.7	8.16
A. cf. tenuis	2021-11-23	13:00:00	8	Control	2	28.7	8.16
A. cf. tenuis	2021-11-23	13:00:00	8	Control	3	28.7	8.16
A. cf. tenuis	2021-11-23	17:00:00	1	Control	1	28.7	8.16
A. cf. tenuis	2021-11-23	17:00:00	1	Control	2	28.6	8.18
A. cf. tenuis	2021-11-23	17:00:00	1	Control	3	28.6	8.18
A. cf. tenuis	2021-11-23	17:00:00	2	Control	1	28.8	8.12
A. cf. tenuis	2021-11-23	17:00:00	2	Control	2	28.8	8.12
A. cf. tenuis	2021-11-23	17:00:00	2	Control	3	28.8	8.11
A. cf. tenuis	2021-11-23	17:00:00	3	HeatStress	1	33.2	8.11
A. cf. tenuis	2021-11-23	17:00:00	3	HeatStress	2	33.2	8.1
A. cf. tenuis	2021-11-23	17:00:00	3	HeatStress	3	33.2	8.1
A. cf. tenuis	2021-11-23	17:00:00	4	HeatStress	1	33	8.09
A. cf. tenuis	2021-11-23	17:00:00	4	HeatStress	2	33	8.08
A. cf. tenuis	2021-11-23	17:00:00	4	HeatStress	3	33	8.09
A. cf. tenuis	2021-11-23	17:00:00	5	HeatStress	1	33.1	8.09
A. cf. tenuis	2021-11-23	17:00:00	5	HeatStress	2	33.1	8.09
A. cf. tenuis	2021-11-23	17:00:00	5	HeatStress	3	33.1	8.1
A. cf. tenuis	2021-11-23	17:00:00	6	Control	1	29	8.08
A. cf. tenuis	2021-11-23	17:00:00	6	Control	2	29	8.08
A. cf. tenuis	2021-11-23	17:00:00	6	Control	3	29	8.08
A. cf. tenuis	2021-11-23	17:00:00	7	HeatStress	1	33.3	8.1
A. cf. tenuis	2021-11-23	17:00:00	7	HeatStress	2	33.3	8.11
A. cf. tenuis	2021-11-23	17:00:00	7	HeatStress	3	33.3	8.11
A. cf. tenuis	2021-11-23	17:00:00	8	Control	1	28.7	8.11
A. cf. tenuis	2021-11-23	17:00:00	8	Control	2	28.7	8.11
A. cf. tenuis	2021-11-23	17:00:00	8	Control	3	28.7	8.11
A. cf. tenuis	2021-11-24	10:00:00	1	Control	1	28.8
A. cf. tenuis	2021-11-24	10:00:00	1	Control	2	28.8	8.11
A. cf. tenuis	2021-11-24	10:00:00	1	Control	3	28.7	8.11
A. cf. tenuis	2021-11-24	10:00:00	2	Control	1	28.9	8.09
A. cf. tenuis	2021-11-24	10:00:00	2	Control	2	28.9	8.09
A. cf. tenuis	2021-11-24	10:00:00	2	Control	3	28.8	8.09
A. cf. tenuis	2021-11-24	10:00:00	3	HeatStress	1	33.1	8.05
A. cf. tenuis	2021-11-24	10:00:00	3	HeatStress	2	33.1	8.06
A. cf. tenuis	2021-11-24	10:00:00	3	HeatStress	3	33	8.05
A. cf. tenuis	2021-11-24	10:00:00	4	HeatStress	1	32.9	8.03
A. cf. tenuis	2021-11-24	10:00:00	4	HeatStress	2	32.9	8.03
A. cf. tenuis	2021-11-24	10:00:00	4	HeatStress	3	32.9	8.03
A. cf. tenuis	2021-11-24	10:00:00	5	HeatStress	1	33	8.02
A. cf. tenuis	2021-11-24	10:00:00	5	HeatStress	2	33	8.02
A. cf. tenuis	2021-11-24	10:00:00	5	HeatStress	3	33	8.02
A. cf. tenuis	2021-11-24	10:00:00	6	Control	1	28.7	8.03
A. cf. tenuis	2021-11-24	10:00:00	6	Control	2	28.7	8.03
A. cf. tenuis	2021-11-24	10:00:00	6	Control	3	28.7	8.03
A. cf. tenuis	2021-11-24	10:00:00	7	HeatStress	1	33.7	8.12
A. cf. tenuis	2021-11-24	10:00:00	7	HeatStress	2	33.6	8.12
A. cf. tenuis	2021-11-24	10:00:00	7	HeatStress	3	33.6	8.12
A. cf. tenuis	2021-11-24	10:00:00	8	Control	1	28.7	8.09
A. cf. tenuis	2021-11-24	10:00:00	8	Control	2	28.7	8.09
A. cf. tenuis	2021-11-24	10:00:00	8	Control	3	28.7	8.08
A. millepora	2021-10-06	17:00:00	1	Control	1	28.8	7.94
A. millepora	2021-10-06	17:00:00	1	Control	2	28.8	7.95
A. millepora	2021-10-06	17:00:00	1	Control	3	28.8	7.95
A. millepora	2021-10-06	17:00:00	2	Control	1	28.7	7.96
A. millepora	2021-10-06	17:00:00	2	Control	2	28.7	7.96
A. millepora	2021-10-06	17:00:00	2	Control	3	28.7	7.96
A. millepora	2021-10-06	17:00:00	3	HeatStress	1	28.7	7.95
A. millepora	2021-10-06	17:00:00	3	HeatStress	2	28.7	7.95
A. millepora	2021-10-06	17:00:00	3	HeatStress	3	28.7	7.95
A. millepora	2021-10-06	17:00:00	4	HeatStress	1	28.8	7.95
A. millepora	2021-10-06	17:00:00	4	HeatStress	2	28.7	7.95
A. millepora	2021-10-06	17:00:00	4	HeatStress	3	28.8	7.95
A. millepora	2021-10-06	17:00:00	5	HeatStress	1	28.8	7.96
A. millepora	2021-10-06	17:00:00	5	HeatStress	2	28.8	7.96
A. millepora	2021-10-06	17:00:00	5	HeatStress	3	28.8	7.96
A. millepora	2021-10-06	17:00:00	6	Control	1	28.7	7.98
A. millepora	2021-10-06	17:00:00	6	Control	2	28.9	7.98
A. millepora	2021-10-06	17:00:00	6	Control	3	28.9	7.98
A. millepora	2021-10-06	17:00:00	7	HeatStress	1	28.9	7.96
A. millepora	2021-10-06	17:00:00	7	HeatStress	2	29	7.96
A. millepora	2021-10-06	17:00:00	7	HeatStress	3	29	7.97
A. millepora	2021-10-06	17:00:00	8	Control	1	28.8	7.98
A. millepora	2021-10-06	17:00:00	8	Control	2	28.8	7.98
A. millepora	2021-10-06	17:00:00	8	Control	3	28.8	7.98
A. millepora	2021-10-07	09:00:00	1	Control	1	28.8	7.99
A. millepora	2021-10-07	09:00:00	1	Control	2	28.9	8
A. millepora	2021-10-07	09:00:00	1	Control	3	28.9	8
A. millepora	2021-10-07	09:00:00	2	Control	1	28.8	8.01
A. millepora	2021-10-07	09:00:00	2	Control	2	28.8	8.01
A. millepora	2021-10-07	09:00:00	2	Control	3	28.8	8.01
A. millepora	2021-10-07	09:00:00	3	HeatStress	1	28.6	8.01
A. millepora	2021-10-07	09:00:00	3	HeatStress	2	28.6	8.01
A. millepora	2021-10-07	09:00:00	3	HeatStress	3	28.6	8
A. millepora	2021-10-07	09:00:00	4	HeatStress	1	28.7	7.99
A. millepora	2021-10-07	09:00:00	4	HeatStress	2	28.7	7.99
A. millepora	2021-10-07	09:00:00	4	HeatStress	3	28.9	7.99
A. millepora	2021-10-07	09:00:00	5	HeatStress	1	28.7	8
A. millepora	2021-10-07	09:00:00	5	HeatStress	2	28.7	8
A. millepora	2021-10-07	09:00:00	5	HeatStress	3	28.7	8
A. millepora	2021-10-07	09:00:00	6	Control	1	28.8	8.02
A. millepora	2021-10-07	09:00:00	6	Control	2	28.8	8.02
A. millepora	2021-10-07	09:00:00	6	Control	3	28.8	8.02
A. millepora	2021-10-07	09:00:00	7	HeatStress	1	28.6	8
A. millepora	2021-10-07	09:00:00	7	HeatStress	2	28.6	8
A. millepora	2021-10-07	09:00:00	7	HeatStress	3	28.6	8
A. millepora	2021-10-07	09:00:00	8	Control	1	28.6	8.02
A. millepora	2021-10-07	09:00:00	8	Control	2	28.6	8.03
A. millepora	2021-10-07	09:00:00	8	Control	3	28.6	8.02
A. millepora	2021-10-07	13:00:00	1	Control	1	28.5	7.89
A. millepora	2021-10-07	13:00:00	1	Control	2	28.5	7.9
A. millepora	2021-10-07	13:00:00	1	Control	3	28.5	7.9
A. millepora	2021-10-07	13:00:00	2	Control	1	29.1	7.91
A. millepora	2021-10-07	13:00:00	2	Control	2	29.1	7.9
A. millepora	2021-10-07	13:00:00	2	Control	3	29	7.91
A. millepora	2021-10-07	13:00:00	3	HeatStress	1	28.6	7.85
A. millepora	2021-10-07	13:00:00	3	HeatStress	2	28.6	7.86
A. millepora	2021-10-07	13:00:00	3	HeatStress	3	28.6	7.9
A. millepora	2021-10-07	13:00:00	4	HeatStress	1	28.9	7.86
A. millepora	2021-10-07	13:00:00	4	HeatStress	2	28.9	7.9
A. millepora	2021-10-07	13:00:00	4	HeatStress	3	28.9	7.9
A. millepora	2021-10-07	13:00:00	5	HeatStress	1	28.7	7.9
A. millepora	2021-10-07	13:00:00	5	HeatStress	2	28.7	7.9
A. millepora	2021-10-07	13:00:00	5	HeatStress	3	28.7	7.9
A. millepora	2021-10-07	13:00:00	6	Control	1	28.8	7.93
A. millepora	2021-10-07	13:00:00	6	Control	2	28.8	7.9
A. millepora	2021-10-07	13:00:00	6	Control	3	28.8	7.93
A. millepora	2021-10-07	13:00:00	7	HeatStress	1	28.5	7.9
A. millepora	2021-10-07	13:00:00	7	HeatStress	2	28.5	7.9
A. millepora	2021-10-07	13:00:00	7	HeatStress	3	28.6	7.9
A. millepora	2021-10-07	13:00:00	8	Control	1	28.6	7.9
A. millepora	2021-10-07	13:00:00	8	Control	2	28.6	7.9
A. millepora	2021-10-07	13:00:00	8	Control	3	28.6	7.91
A. millepora	2021-10-07	17:00:00	1	Control	1	28.6	8
A. millepora	2021-10-07	17:00:00	1	Control	2	28.6	8.02
A. millepora	2021-10-07	17:00:00	1	Control	3	28.6	8.01
A. millepora	2021-10-07	17:00:00	2	Control	1	28.8	8.03
A. millepora	2021-10-07	17:00:00	2	Control	2	28.8	8.03
A. millepora	2021-10-07	17:00:00	2	Control	3	28.8	8.04
A. millepora	2021-10-07	17:00:00	3	HeatStress	1	28.6	8.04
A. millepora	2021-10-07	17:00:00	3	HeatStress	2	28.6	8.04
A. millepora	2021-10-07	17:00:00	3	HeatStress	3	28.6	8.04
A. millepora	2021-10-07	17:00:00	4	HeatStress	1	28.6	8.03
A. millepora	2021-10-07	17:00:00	4	HeatStress	2	28.7	8.03
A. millepora	2021-10-07	17:00:00	4	HeatStress	3	28.7	8.04
A. millepora	2021-10-07	17:00:00	5	HeatStress	1	28.6	8.03
A. millepora	2021-10-07	17:00:00	5	HeatStress	2	28.6	8.03
A. millepora	2021-10-07	17:00:00	5	HeatStress	3	28.6	8.03
A. millepora	2021-10-07	17:00:00	6	Control	1	28.6	8.05
A. millepora	2021-10-07	17:00:00	6	Control	2	28.7	8.05
A. millepora	2021-10-07	17:00:00	6	Control	3	28.7	8.04
A. millepora	2021-10-07	17:00:00	7	HeatStress	1	28.7	8.03
A. millepora	2021-10-07	17:00:00	7	HeatStress	2	28.7	8.03
A. millepora	2021-10-07	17:00:00	7	HeatStress	3	28.7	8.03
A. millepora	2021-10-07	17:00:00	8	Control	1	28.7	8.04
A. millepora	2021-10-07	17:00:00	8	Control	2	28.7	8.04
A. millepora	2021-10-07	17:00:00	8	Control	3	28.7	8.04
A. millepora	2021-10-08	09:30:00	1	Control	1	28.8	7.99
A. millepora	2021-10-08	09:30:00	1	Control	2	28.7	8.01
A. millepora	2021-10-08	09:30:00	1	Control	3	28.7	8.01
A. millepora	2021-10-08	09:30:00	2	Control	1	29.1	8.01
A. millepora	2021-10-08	09:30:00	2	Control	2	29.2	8.02
A. millepora	2021-10-08	09:30:00	2	Control	3	29.1	8.01
A. millepora	2021-10-08	09:30:00	3	HeatStress	1	28.6	7.99
A. millepora	2021-10-08	09:30:00	3	HeatStress	2	28.6	7.99
A. millepora	2021-10-08	09:30:00	3	HeatStress	3	28.5	7.99
A. millepora	2021-10-08	09:30:00	4	HeatStress	1	28.8	7.99
A. millepora	2021-10-08	09:30:00	4	HeatStress	2	28.7	8
A. millepora	2021-10-08	09:30:00	4	HeatStress	3	28.7	8
A. millepora	2021-10-08	09:30:00	5	HeatStress	1	28.7	7.99
A. millepora	2021-10-08	09:30:00	5	HeatStress	2	28.7	7.99
A. millepora	2021-10-08	09:30:00	5	HeatStress	3	28.5	7.99
A. millepora	2021-10-08	09:30:00	6	Control	1	28.8	8.02
A. millepora	2021-10-08	09:30:00	6	Control	2	28.8	8.03
A. millepora	2021-10-08	09:30:00	6	Control	3	28.7	8.03
A. millepora	2021-10-08	09:30:00	7	HeatStress	1	28.8	7.99
A. millepora	2021-10-08	09:30:00	7	HeatStress	2	28.7	7.98
A. millepora	2021-10-08	09:30:00	7	HeatStress	3	28.7	7.99
A. millepora	2021-10-08	09:30:00	8	Control	1	28.7	8.02
A. millepora	2021-10-08	09:30:00	8	Control	2	28.5	8.03
A. millepora	2021-10-08	09:30:00	8	Control	3	28.6	8.02
A. millepora	2021-10-08	13:30:00	1	Control	1	28.8	7.99
A. millepora	2021-10-08	13:30:00	1	Control	2	28.8	8.01
A. millepora	2021-10-08	13:30:00	1	Control	3	28.7	8.02
A. millepora	2021-10-08	13:30:00	2	Control	1	29	8.03
A. millepora	2021-10-08	13:30:00	2	Control	2	29.1	8.03
A. millepora	2021-10-08	13:30:00	2	Control	3	29.1	8.03
A. millepora	2021-10-08	13:30:00	3	HeatStress	1	28.6	8.03
A. millepora	2021-10-08	13:30:00	3	HeatStress	2	28.6	8.03
A. millepora	2021-10-08	13:30:00	3	HeatStress	3	28.6	8.03
A. millepora	2021-10-08	13:30:00	4	HeatStress	1	28.7	8.02
A. millepora	2021-10-08	13:30:00	4	HeatStress	2	28.7	8.02
A. millepora	2021-10-08	13:30:00	4	HeatStress	3	28.7	8.02
A. millepora	2021-10-08	13:30:00	5	HeatStress	1	28.7	8.01
A. millepora	2021-10-08	13:30:00	5	HeatStress	2	28.7	8.01
A. millepora	2021-10-08	13:30:00	5	HeatStress	3	28.7	8.01
A. millepora	2021-10-08	13:30:00	6	Control	1	28.8	8.04
A. millepora	2021-10-08	13:30:00	6	Control	2	28.8	8.04
A. millepora	2021-10-08	13:30:00	6	Control	3	28.8	8.04
A. millepora	2021-10-08	13:30:00	7	HeatStress	1	28.6	8.01
A. millepora	2021-10-08	13:30:00	7	HeatStress	2	28.6	8.01
A. millepora	2021-10-08	13:30:00	7	HeatStress	3	28.6	8.01
A. millepora	2021-10-08	13:30:00	8	Control	1	28.8	8.03
A. millepora	2021-10-08	13:30:00	8	Control	2	28.8	8.03
A. millepora	2021-10-08	13:30:00	8	Control	3	28.7	8.03
A. millepora	2021-10-08	17:00:00	1	Control	1	28.6	8
A. millepora	2021-10-08	17:00:00	1	Control	2	28.6	8
A. millepora	2021-10-08	17:00:00	1	Control	3	28.6	8.01
A. millepora	2021-10-08	17:00:00	2	Control	1	28.8	8.03
A. millepora	2021-10-08	17:00:00	2	Control	2	28.8	8.03
A. millepora	2021-10-08	17:00:00	2	Control	3	28.8	8.04
A. millepora	2021-10-08	17:00:00	3	HeatStress	1	28.6	8.04
A. millepora	2021-10-08	17:00:00	3	HeatStress	2	28.6	8.04
A. millepora	2021-10-08	17:00:00	3	HeatStress	3	28.6	8.04
A. millepora	2021-10-08	17:00:00	4	HeatStress	1	28.7	8.03
A. millepora	2021-10-08	17:00:00	4	HeatStress	2	28.7	8.03
A. millepora	2021-10-08	17:00:00	4	HeatStress	3	28.7	8.04
A. millepora	2021-10-08	17:00:00	5	HeatStress	1	28.6	8.03
A. millepora	2021-10-08	17:00:00	5	HeatStress	2	28.6	8.03
A. millepora	2021-10-08	17:00:00	5	HeatStress	3	28.6	8.03
A. millepora	2021-10-08	17:00:00	6	Control	1	28.7	8.05
A. millepora	2021-10-08	17:00:00	6	Control	2	28.7	8.05
A. millepora	2021-10-08	17:00:00	6	Control	3	28.6	8.04
A. millepora	2021-10-08	17:00:00	7	HeatStress	1	28.7	8.03
A. millepora	2021-10-08	17:00:00	7	HeatStress	2	28.7	8.03
A. millepora	2021-10-08	17:00:00	7	HeatStress	3	28.7	8.03
A. millepora	2021-10-08	17:00:00	8	Control	1	28.7	8.04
A. millepora	2021-10-08	17:00:00	8	Control	2	28.7	8.04
A. millepora	2021-10-08	17:00:00	8	Control	3	28.7	8.04
A. millepora	2021-10-09	09:30:00	1	Control	1	28.8	8.01
A. millepora	2021-10-09	09:30:00	1	Control	2	28.7	8.01
A. millepora	2021-10-09	09:30:00	1	Control	3	28.8	8.02
A. millepora	2021-10-09	09:30:00	2	Control	1	28.9	8.04
A. millepora	2021-10-09	09:30:00	2	Control	2	28.8	8.04
A. millepora	2021-10-09	09:30:00	2	Control	3	28.8	8.05
A. millepora	2021-10-09	09:30:00	3	HeatStress	1	28.9	8.05
A. millepora	2021-10-09	09:30:00	3	HeatStress	2	28.7	8.05
A. millepora	2021-10-09	09:30:00	3	HeatStress	3	28.6	8.05
A. millepora	2021-10-09	09:30:00	4	HeatStress	1	28.9	8.04
A. millepora	2021-10-09	09:30:00	4	HeatStress	2	28.7	8.04
A. millepora	2021-10-09	09:30:00	4	HeatStress	3	28.7	8.05
A. millepora	2021-10-09	09:30:00	5	HeatStress	1	28.8	8.04
A. millepora	2021-10-09	09:30:00	5	HeatStress	2	28.8	8.04
A. millepora	2021-10-09	09:30:00	5	HeatStress	3	28.5	8.04
A. millepora	2021-10-09	09:30:00	6	Control	1	28.8	8.06
A. millepora	2021-10-09	09:30:00	6	Control	2	28.8	8.06
A. millepora	2021-10-09	09:30:00	6	Control	3	28.8	8.05
A. millepora	2021-10-09	09:30:00	7	HeatStress	1	28.8	8.04
A. millepora	2021-10-09	09:30:00	7	HeatStress	2	28.8	8.04
A. millepora	2021-10-09	09:30:00	7	HeatStress	3	28.7	8.04
A. millepora	2021-10-09	09:30:00	8	Control	1	28.6	8.05
A. millepora	2021-10-09	09:30:00	8	Control	2	28.7	8.05
A. millepora	2021-10-09	09:30:00	8	Control	3	28.6	8.05
A. millepora	2021-10-09	13:00:00	1	Control	1	28.6	8.06
A. millepora	2021-10-09	13:00:00	1	Control	2	28.6	8.06
A. millepora	2021-10-09	13:00:00	1	Control	3	28.6	8.06
A. millepora	2021-10-09	13:00:00	2	Control	1	28.7	8.1
A. millepora	2021-10-09	13:00:00	2	Control	2	28.7	8.1
A. millepora	2021-10-09	13:00:00	2	Control	3	28.6	8.1
A. millepora	2021-10-09	13:00:00	3	HeatStress	1	28.6	8.1
A. millepora	2021-10-09	13:00:00	3	HeatStress	2	28.6	8.1
A. millepora	2021-10-09	13:00:00	3	HeatStress	3	28.6	8.09
A. millepora	2021-10-09	13:00:00	4	HeatStress	1	28.7	8.1
A. millepora	2021-10-09	13:00:00	4	HeatStress	2	28.7	8.1
A. millepora	2021-10-09	13:00:00	4	HeatStress	3	28.8	8.1
A. millepora	2021-10-09	13:00:00	5	HeatStress	1	28.6	8.07
A. millepora	2021-10-09	13:00:00	5	HeatStress	2	28.7	8.07
A. millepora	2021-10-09	13:00:00	5	HeatStress	3	28.7	8.07
A. millepora	2021-10-09	13:00:00	6	Control	1	28.8	8.09
A. millepora	2021-10-09	13:00:00	6	Control	2	28.8	8.09
A. millepora	2021-10-09	13:00:00	6	Control	3	28.8	8.09
A. millepora	2021-10-09	13:00:00	7	HeatStress	1	28.6	8.1
A. millepora	2021-10-09	13:00:00	7	HeatStress	2	28.6	8.1
A. millepora	2021-10-09	13:00:00	7	HeatStress	3	28.6	8.1
A. millepora	2021-10-09	13:00:00	8	Control	1	28.7	8.08
A. millepora	2021-10-09	13:00:00	8	Control	2	28.7	8.08
A. millepora	2021-10-09	13:00:00	8	Control	3	28.7	8.08
A. millepora	2021-10-09	17:00:00	1	Control	1	28.5	8.04
A. millepora	2021-10-09	17:00:00	1	Control	2	28.5	8.04
A. millepora	2021-10-09	17:00:00	1	Control	3	28.5	8.04
A. millepora	2021-10-09	17:00:00	2	Control	1	28.9	8.08
A. millepora	2021-10-09	17:00:00	2	Control	2	28.9	8.08
A. millepora	2021-10-09	17:00:00	2	Control	3	28.9	8.08
A. millepora	2021-10-09	17:00:00	3	HeatStress	1	28.6	8.08
A. millepora	2021-10-09	17:00:00	3	HeatStress	2	28.6	8.08
A. millepora	2021-10-09	17:00:00	3	HeatStress	3	28.6	8.08
A. millepora	2021-10-09	17:00:00	4	HeatStress	1	28.8	8.09
A. millepora	2021-10-09	17:00:00	4	HeatStress	2	28.8	8.09
A. millepora	2021-10-09	17:00:00	4	HeatStress	3	28.8	8.09
A. millepora	2021-10-09	17:00:00	5	HeatStress	1	28.6	8.06
A. millepora	2021-10-09	17:00:00	5	HeatStress	2	28.6	8.06
A. millepora	2021-10-09	17:00:00	5	HeatStress	3	28.6	8.06
A. millepora	2021-10-09	17:00:00	6	Control	1	28.8	8.07
A. millepora	2021-10-09	17:00:00	6	Control	2	28.8	8.07
A. millepora	2021-10-09	17:00:00	6	Control	3	28.8	8.07
A. millepora	2021-10-09	17:00:00	7	HeatStress	1	28.6	8.07
A. millepora	2021-10-09	17:00:00	7	HeatStress	2	28.7	8.07
A. millepora	2021-10-09	17:00:00	7	HeatStress	3	28.6	8.07
A. millepora	2021-10-09	17:00:00	8	Control	1	28.7	8.06
A. millepora	2021-10-09	17:00:00	8	Control	2	28.7	8.06
A. millepora	2021-10-09	17:00:00	8	Control	3	28.7	8.06
A. millepora	2021-10-10	09:00:00	1	Control	1	28.6	8.14
A. millepora	2021-10-10	09:00:00	1	Control	2	28.7	8.14
A. millepora	2021-10-10	09:00:00	1	Control	3	28.7	8.14
A. millepora	2021-10-10	09:00:00	2	Control	1	28.7	8.14
A. millepora	2021-10-10	09:00:00	2	Control	2	28.8	8.14
A. millepora	2021-10-10	09:00:00	2	Control	3	28.7	8.17
A. millepora	2021-10-10	09:00:00	3	HeatStress	1	30.1	8.17
A. millepora	2021-10-10	09:00:00	3	HeatStress	2	30.1	8.17
A. millepora	2021-10-10	09:00:00	3	HeatStress	3	30.1	8.17
A. millepora	2021-10-10	09:00:00	4	HeatStress	1	30	8.16
A. millepora	2021-10-10	09:00:00	4	HeatStress	2	30	8.16
A. millepora	2021-10-10	09:00:00	4	HeatStress	3	30	8.16
A. millepora	2021-10-10	09:00:00	5	HeatStress	1	30.2	8.15
A. millepora	2021-10-10	09:00:00	5	HeatStress	2	30.2	8.15
A. millepora	2021-10-10	09:00:00	5	HeatStress	3	30.2	8.15
A. millepora	2021-10-10	09:00:00	6	Control	1	28.6	8.17
A. millepora	2021-10-10	09:00:00	6	Control	2	28.6	8.18
A. millepora	2021-10-10	09:00:00	6	Control	3	28.7	8.18
A. millepora	2021-10-10	09:00:00	7	HeatStress	1	30.2	8.19
A. millepora	2021-10-10	09:00:00	7	HeatStress	2	30.2	8.19
A. millepora	2021-10-10	09:00:00	7	HeatStress	3	30.2	8.19
A. millepora	2021-10-10	09:00:00	8	Control	1	28.8	8.15
A. millepora	2021-10-10	09:00:00	8	Control	2	28.8	8.16
A. millepora	2021-10-10	09:00:00	8	Control	3	28.8	8.16
A. millepora	2021-10-10	13:00:00	1	Control	1	29	8.16
A. millepora	2021-10-10	13:00:00	1	Control	2	29	8.16
A. millepora	2021-10-10	13:00:00	1	Control	3	28.8	8.17
A. millepora	2021-10-10	13:00:00	2	Control	1	28.7	8.19
A. millepora	2021-10-10	13:00:00	2	Control	2	28.7	8.19
A. millepora	2021-10-10	13:00:00	2	Control	3	28.7	8.19
A. millepora	2021-10-10	13:00:00	3	HeatStress	1	30.2	8.19
A. millepora	2021-10-10	13:00:00	3	HeatStress	2	30.2	8.17
A. millepora	2021-10-10	13:00:00	3	HeatStress	3	30.1	8.18
A. millepora	2021-10-10	13:00:00	4	HeatStress	1	30	8.17
A. millepora	2021-10-10	13:00:00	4	HeatStress	2	30	8.17
A. millepora	2021-10-10	13:00:00	4	HeatStress	3	30	8.17
A. millepora	2021-10-10	13:00:00	5	HeatStress	1	30.2	8.12
A. millepora	2021-10-10	13:00:00	5	HeatStress	2	30.2	8.11
A. millepora	2021-10-10	13:00:00	5	HeatStress	3	30.3	8.11
A. millepora	2021-10-10	13:00:00	6	Control	1	29	8.15
A. millepora	2021-10-10	13:00:00	6	Control	2	29	8.15
A. millepora	2021-10-10	13:00:00	6	Control	3	28.9	8.16
A. millepora	2021-10-10	13:00:00	7	HeatStress	1	30.1	8.14
A. millepora	2021-10-10	13:00:00	7	HeatStress	2	30.2	8.15
A. millepora	2021-10-10	13:00:00	7	HeatStress	3	30.2	8.15
A. millepora	2021-10-10	13:00:00	8	Control	1	28.8	8.13
A. millepora	2021-10-10	13:00:00	8	Control	2	28.8	8.14
A. millepora	2021-10-10	13:00:00	8	Control	3	28.8	8.14
A. millepora	2021-10-10	17:00:00	1	Control	1	28.7	8.07
A. millepora	2021-10-10	17:00:00	1	Control	2	28.7	8.08
A. millepora	2021-10-10	17:00:00	1	Control	3	28.7	8.07
A. millepora	2021-10-10	17:00:00	2	Control	1	29.1	8.11
A. millepora	2021-10-10	17:00:00	2	Control	2	29.2	8.11
A. millepora	2021-10-10	17:00:00	2	Control	3	29.1	8.11
A. millepora	2021-10-10	17:00:00	3	HeatStress	1	30.1	8.12
A. millepora	2021-10-10	17:00:00	3	HeatStress	2	30.1	8.12
A. millepora	2021-10-10	17:00:00	3	HeatStress	3	30.1	8.12
A. millepora	2021-10-10	17:00:00	4	HeatStress	1	30	8.13
A. millepora	2021-10-10	17:00:00	4	HeatStress	2	30	8.14
A. millepora	2021-10-10	17:00:00	4	HeatStress	3	30	8.13
A. millepora	2021-10-10	17:00:00	5	HeatStress	1	30.1	8.09
A. millepora	2021-10-10	17:00:00	5	HeatStress	2	30.2	8.09
A. millepora	2021-10-10	17:00:00	5	HeatStress	3	30.4	8.09
A. millepora	2021-10-10	17:00:00	6	Control	1	28.6	8.09
A. millepora	2021-10-10	17:00:00	6	Control	2	28.5	8.09
A. millepora	2021-10-10	17:00:00	6	Control	3	28.6	8.09
A. millepora	2021-10-10	17:00:00	7	HeatStress	1	30	8.1
A. millepora	2021-10-10	17:00:00	7	HeatStress	2	30	8.1
A. millepora	2021-10-10	17:00:00	7	HeatStress	3	30	8.1
A. millepora	2021-10-10	17:00:00	8	Control	1	29.1	8.08
A. millepora	2021-10-10	17:00:00	8	Control	2	29.1	8.08
A. millepora	2021-10-10	17:00:00	8	Control	3	29.1	8.08
A. millepora	2021-10-11	09:00:00	1	Control	1	28.7	8.04
A. millepora	2021-10-11	09:00:00	1	Control	2	28.7	8.04
A. millepora	2021-10-11	09:00:00	1	Control	3	28.6	8.04
A. millepora	2021-10-11	09:00:00	2	Control	1	28.7	8.04
A. millepora	2021-10-11	09:00:00	2	Control	2	28.8	8.06
A. millepora	2021-10-11	09:00:00	2	Control	3	28.7	8.09
A. millepora	2021-10-11	09:00:00	3	HeatStress	1	31.1	8.07
A. millepora	2021-10-11	09:00:00	3	HeatStress	2	31.1	8.07
A. millepora	2021-10-11	09:00:00	3	HeatStress	3	31.1	8.07
A. millepora	2021-10-11	09:00:00	4	HeatStress	1	31	8.06
A. millepora	2021-10-11	09:00:00	4	HeatStress	2	31	8.06
A. millepora	2021-10-11	09:00:00	4	HeatStress	3	31	8.06
A. millepora	2021-10-11	09:00:00	5	HeatStress	1	31.1	8.05
A. millepora	2021-10-11	09:00:00	5	HeatStress	2	31.1	8.05
A. millepora	2021-10-11	09:00:00	5	HeatStress	3	31.1	8.05
A. millepora	2021-10-11	09:00:00	6	Control	1	28.6	8.09
A. millepora	2021-10-11	09:00:00	6	Control	2	28.6	8.08
A. millepora	2021-10-11	09:00:00	6	Control	3	28.6	8.08
A. millepora	2021-10-11	09:00:00	7	HeatStress	1	30.9	8.09
A. millepora	2021-10-11	09:00:00	7	HeatStress	2	30.5	8.09
A. millepora	2021-10-11	09:00:00	7	HeatStress	3	30.5	8.09
A. millepora	2021-10-11	09:00:00	8	Control	1	29	8.05
A. millepora	2021-10-11	09:00:00	8	Control	2	29	8.06
A. millepora	2021-10-11	09:00:00	8	Control	3	29	8.06
A. millepora	2021-10-11	13:00:00	1	Control	1	28.9	8.08
A. millepora	2021-10-11	13:00:00	1	Control	2	28.9	8.08
A. millepora	2021-10-11	13:00:00	1	Control	3	28.9	8.1
A. millepora	2021-10-11	13:00:00	2	Control	1	28.6	8.12
A. millepora	2021-10-11	13:00:00	2	Control	2	28.6	8.12
A. millepora	2021-10-11	13:00:00	2	Control	3	28.6	8.11
A. millepora	2021-10-11	13:00:00	3	HeatStress	1	31.2	8.09
A. millepora	2021-10-11	13:00:00	3	HeatStress	2	31.2	8.09
A. millepora	2021-10-11	13:00:00	3	HeatStress	3	31.2	8.09
A. millepora	2021-10-11	13:00:00	4	HeatStress	1	31	8.12
A. millepora	2021-10-11	13:00:00	4	HeatStress	2	31	8.11
A. millepora	2021-10-11	13:00:00	4	HeatStress	3	31	8.12
A. millepora	2021-10-11	13:00:00	5	HeatStress	1	31.1	8.09
A. millepora	2021-10-11	13:00:00	5	HeatStress	2	31.1	8.09
A. millepora	2021-10-11	13:00:00	5	HeatStress	3	31	8.08
A. millepora	2021-10-11	13:00:00	6	Control	1	28.6	8.09
A. millepora	2021-10-11	13:00:00	6	Control	2	28.6	8.09
A. millepora	2021-10-11	13:00:00	6	Control	3	28.6	8.09
A. millepora	2021-10-11	13:00:00	7	HeatStress	1	30.2	8.11
A. millepora	2021-10-11	13:00:00	7	HeatStress	2	30.2	8.11
A. millepora	2021-10-11	13:00:00	7	HeatStress	3	30.2	8.11
A. millepora	2021-10-11	13:00:00	8	Control	1	28.5	8.09
A. millepora	2021-10-11	13:00:00	8	Control	2	28.5	8.08
A. millepora	2021-10-11	13:00:00	8	Control	3	28.5	8.09
A. millepora	2021-10-11	18:00:00	1	Control	1	29	8.01
A. millepora	2021-10-11	18:00:00	1	Control	2	29	8.02
A. millepora	2021-10-11	18:00:00	1	Control	3	29	8.03
A. millepora	2021-10-11	18:00:00	2	Control	1	28.9	8.07
A. millepora	2021-10-11	18:00:00	2	Control	2	28.9	8.07
A. millepora	2021-10-11	18:00:00	2	Control	3	29	8.09
A. millepora	2021-10-11	18:00:00	3	HeatStress	1	31.1	8.06
A. millepora	2021-10-11	18:00:00	3	HeatStress	2	31.1	8.06
A. millepora	2021-10-11	18:00:00	3	HeatStress	3	31	8.07
A. millepora	2021-10-11	18:00:00	4	HeatStress	1	31	8.14
A. millepora	2021-10-11	18:00:00	4	HeatStress	2	31.1	8.14
A. millepora	2021-10-11	18:00:00	4	HeatStress	3	31	8.14
A. millepora	2021-10-11	18:00:00	5	HeatStress	1	31.1	8.07
A. millepora	2021-10-11	18:00:00	5	HeatStress	2	31.1	8.07
A. millepora	2021-10-11	18:00:00	5	HeatStress	3	31.1	8.07
A. millepora	2021-10-11	18:00:00	6	Control	1	28.7	8.04
A. millepora	2021-10-11	18:00:00	6	Control	2	28.7	8.04
A. millepora	2021-10-11	18:00:00	6	Control	3	28.7	8.04
A. millepora	2021-10-11	18:00:00	7	HeatStress	1	31	8.06
A. millepora	2021-10-11	18:00:00	7	HeatStress	2	31	8.06
A. millepora	2021-10-11	18:00:00	7	HeatStress	3	31	8.06
A. millepora	2021-10-11	18:00:00	8	Control	1	28.7	8.06
A. millepora	2021-10-11	18:00:00	8	Control	2	28.7	8.06
A. millepora	2021-10-11	18:00:00	8	Control	3	28.7	8.06
A. millepora	2021-10-12	09:30:00	1	Control	1	28.9	8.09
A. millepora	2021-10-12	09:30:00	1	Control	2	28.9	8.08
A. millepora	2021-10-12	09:30:00	1	Control	3	28.9	8.08
A. millepora	2021-10-12	09:30:00	2	Control	1	28.5	8.08
A. millepora	2021-10-12	09:30:00	2	Control	2	28.5	8.08
A. millepora	2021-10-12	09:30:00	2	Control	3	28.5	8.08
A. millepora	2021-10-12	09:30:00	3	HeatStress	1	32	8.07
A. millepora	2021-10-12	09:30:00	3	HeatStress	2	32	8.07
A. millepora	2021-10-12	09:30:00	3	HeatStress	3	32	8.08
A. millepora	2021-10-12	09:30:00	4	HeatStress	1	32	8.11
A. millepora	2021-10-12	09:30:00	4	HeatStress	2	32	8.11
A. millepora	2021-10-12	09:30:00	4	HeatStress	3	31.9	8.11
A. millepora	2021-10-12	09:30:00	5	HeatStress	1	32.1	8.07
A. millepora	2021-10-12	09:30:00	5	HeatStress	2	32.1	8.07
A. millepora	2021-10-12	09:30:00	5	HeatStress	3	32.1	8.07
A. millepora	2021-10-12	09:30:00	6	Control	1	28.6	8.06
A. millepora	2021-10-12	09:30:00	6	Control	2	28.7	8.07
A. millepora	2021-10-12	09:30:00	6	Control	3	28.7	8.07
A. millepora	2021-10-12	09:30:00	7	HeatStress	1	32.4	8.08
A. millepora	2021-10-12	09:30:00	7	HeatStress	2	32.4	8.08
A. millepora	2021-10-12	09:30:00	7	HeatStress	3	32.4	8.08
A. millepora	2021-10-12	09:30:00	8	Control	1	28.7	8.06
A. millepora	2021-10-12	09:30:00	8	Control	2	28.7	8.07
A. millepora	2021-10-12	09:30:00	8	Control	3	28.6	8.09
A. millepora	2021-10-12	13:30:00	1	Control	1	28.5	8.06
A. millepora	2021-10-12	13:30:00	1	Control	2	28.5	8.06
A. millepora	2021-10-12	13:30:00	1	Control	3	28.5	8.07
A. millepora	2021-10-12	13:30:00	2	Control	1	28.4	8.09
A. millepora	2021-10-12	13:30:00	2	Control	2	28.4	8.09
A. millepora	2021-10-12	13:30:00	2	Control	3	28.5	8.1
A. millepora	2021-10-12	13:30:00	3	HeatStress	1	32	8.07
A. millepora	2021-10-12	13:30:00	3	HeatStress	2	32	8.08
A. millepora	2021-10-12	13:30:00	3	HeatStress	3	32	8.08
A. millepora	2021-10-12	13:30:00	4	HeatStress	1	32	8.13
A. millepora	2021-10-12	13:30:00	4	HeatStress	2	32	8.13
A. millepora	2021-10-12	13:30:00	4	HeatStress	3	31.9	8.14
A. millepora	2021-10-12	13:30:00	5	HeatStress	1	32.1	8.08
A. millepora	2021-10-12	13:30:00	5	HeatStress	2	32.1	8.08
A. millepora	2021-10-12	13:30:00	5	HeatStress	3	32.1	8.08
A. millepora	2021-10-12	13:30:00	6	Control	1	28.5	8.08
A. millepora	2021-10-12	13:30:00	6	Control	2	28.5	8.08
A. millepora	2021-10-12	13:30:00	6	Control	3	28.4	8.08
A. millepora	2021-10-12	13:30:00	7	HeatStress	1	32.2	8.06
A. millepora	2021-10-12	13:30:00	7	HeatStress	2	32.2	8.06
A. millepora	2021-10-12	13:30:00	7	HeatStress	3	32.3	8.06
A. millepora	2021-10-12	13:30:00	8	Control	1	28.5	8.07
A. millepora	2021-10-12	13:30:00	8	Control	2	28.5	8.07
A. millepora	2021-10-12	13:30:00	8	Control	3	28.6	8.06
A. millepora	2021-10-12	18:00:00	1	Control	1	28.6	8
A. millepora	2021-10-12	18:00:00	1	Control	2	28.6	7.98
A. millepora	2021-10-12	18:00:00	1	Control	3	28.6	7.99
A. millepora	2021-10-12	18:00:00	2	Control	1	28.6	8.02
A. millepora	2021-10-12	18:00:00	2	Control	2	28.6	8.03
A. millepora	2021-10-12	18:00:00	2	Control	3	28.6	8.03
A. millepora	2021-10-12	18:00:00	3	HeatStress	1	32.1	8.01
A. millepora	2021-10-12	18:00:00	3	HeatStress	2	32.2	8.01
A. millepora	2021-10-12	18:00:00	3	HeatStress	3	32.2	8.01
A. millepora	2021-10-12	18:00:00	4	HeatStress	1	32	8.11
A. millepora	2021-10-12	18:00:00	4	HeatStress	2	32.1	8.11
A. millepora	2021-10-12	18:00:00	4	HeatStress	3	32	8.12
A. millepora	2021-10-12	18:00:00	5	HeatStress	1	31.9	8.07
A. millepora	2021-10-12	18:00:00	5	HeatStress	2	31.9	8.07
A. millepora	2021-10-12	18:00:00	5	HeatStress	3	31.9	8.07
A. millepora	2021-10-12	18:00:00	6	Control	1	28.6	8.04
A. millepora	2021-10-12	18:00:00	6	Control	2	28.6	8.03
A. millepora	2021-10-12	18:00:00	6	Control	3	28.6	8.03
A. millepora	2021-10-12	18:00:00	7	HeatStress	1	32	8
A. millepora	2021-10-12	18:00:00	7	HeatStress	2	32.1	7.99
A. millepora	2021-10-12	18:00:00	7	HeatStress	3	32.1	7.99
A. millepora	2021-10-12	18:00:00	8	Control	1	28.6	7.98
A. millepora	2021-10-12	18:00:00	8	Control	2	28.5	7.99
A. millepora	2021-10-12	18:00:00	8	Control	3	28.5	8
A. millepora	2021-10-13	09:00:00	1	Control	1	28.7	8.04
A. millepora	2021-10-13	09:00:00	1	Control	2	28.7	8.04
A. millepora	2021-10-13	09:00:00	1	Control	3	28.7	8.05
A. millepora	2021-10-13	09:00:00	2	Control	1	28.4	8.04
A. millepora	2021-10-13	09:00:00	2	Control	2	28.4	8.04
A. millepora	2021-10-13	09:00:00	2	Control	3	28.4	8.04
A. millepora	2021-10-13	09:00:00	3	HeatStress	1	33.1	8.04
A. millepora	2021-10-13	09:00:00	3	HeatStress	2	33.1	8.04
A. millepora	2021-10-13	09:00:00	3	HeatStress	3	33.1	8.04
A. millepora	2021-10-13	09:00:00	4	HeatStress	1	33	8.05
A. millepora	2021-10-13	09:00:00	4	HeatStress	2	33	8.05
A. millepora	2021-10-13	09:00:00	4	HeatStress	3	33	8.05
A. millepora	2021-10-13	09:00:00	5	HeatStress	1	33.2	8.03
A. millepora	2021-10-13	09:00:00	5	HeatStress	2	33.2	8.03
A. millepora	2021-10-13	09:00:00	5	HeatStress	3	33.1	8.03
A. millepora	2021-10-13	09:00:00	6	Control	1	28.7	8.04
A. millepora	2021-10-13	09:00:00	6	Control	2	28.7	8.05
A. millepora	2021-10-13	09:00:00	6	Control	3	28.7	8.05
A. millepora	2021-10-13	09:00:00	7	HeatStress	1	33.2	8.02
A. millepora	2021-10-13	09:00:00	7	HeatStress	2	33.2	8.02
A. millepora	2021-10-13	09:00:00	7	HeatStress	3	33.3	8.02
A. millepora	2021-10-13	09:00:00	8	Control	1	28.6	8.06
A. millepora	2021-10-13	09:00:00	8	Control	2	28.6	8.06
A. millepora	2021-10-13	09:00:00	8	Control	3	28.4	8.06
A. millepora	2021-10-13	13:30:00	1	Control	1	28.7	8.11
A. millepora	2021-10-13	13:30:00	1	Control	2	28.7	8.12
A. millepora	2021-10-13	13:30:00	1	Control	3	28.7	8.13
A. millepora	2021-10-13	13:30:00	2	Control	1	28.6	8.14
A. millepora	2021-10-13	13:30:00	2	Control	2	28.6	8.14
A. millepora	2021-10-13	13:30:00	2	Control	3	28.6	8.14
A. millepora	2021-10-13	13:30:00	3	HeatStress	1	33.3	8.13
A. millepora	2021-10-13	13:30:00	3	HeatStress	2	33.2	8.13
A. millepora	2021-10-13	13:30:00	3	HeatStress	3	33.2	8.13
A. millepora	2021-10-13	13:30:00	4	HeatStress	1	32.9	8.11
A. millepora	2021-10-13	13:30:00	4	HeatStress	2	32.9	8.11
A. millepora	2021-10-13	13:30:00	4	HeatStress	3	32.8	8.11
A. millepora	2021-10-13	13:30:00	5	HeatStress	1	33.2	8.12
A. millepora	2021-10-13	13:30:00	5	HeatStress	2	33.2	8.12
A. millepora	2021-10-13	13:30:00	5	HeatStress	3	33.2	8.12
A. millepora	2021-10-13	13:30:00	6	Control	1	28.7	8.12
A. millepora	2021-10-13	13:30:00	6	Control	2	28.7	8.13
A. millepora	2021-10-13	13:30:00	6	Control	3	28.6	8.13
A. millepora	2021-10-13	13:30:00	7	HeatStress	1	33.2	8.11
A. millepora	2021-10-13	13:30:00	7	HeatStress	2	33.2	8.12
A. millepora	2021-10-13	13:30:00	7	HeatStress	3	33.2	8.11
A. millepora	2021-10-13	13:30:00	8	Control	1	28.6	8.1
A. millepora	2021-10-13	13:30:00	8	Control	2	28.6	8.1
A. millepora	2021-10-13	13:30:00	8	Control	3	28.6	8.09
A. millepora	2021-10-13	18:00:00	1	Control	1	28.6	8.05
A. millepora	2021-10-13	18:00:00	1	Control	2	28.6	8.06
A. millepora	2021-10-13	18:00:00	1	Control	3	28.6	8.06
A. millepora	2021-10-13	18:00:00	2	Control	1	28.7	8.07
A. millepora	2021-10-13	18:00:00	2	Control	2	28.7	8.07
A. millepora	2021-10-13	18:00:00	2	Control	3	28.7	8.07
A. millepora	2021-10-13	18:00:00	3	HeatStress	1	33.2	8.08
A. millepora	2021-10-13	18:00:00	3	HeatStress	2	33.3	8.08
A. millepora	2021-10-13	18:00:00	3	HeatStress	3	33.3	8.08
A. millepora	2021-10-13	18:00:00	4	HeatStress	1	33	8.01
A. millepora	2021-10-13	18:00:00	4	HeatStress	2	33	8.01
A. millepora	2021-10-13	18:00:00	4	HeatStress	3	33	8.02
A. millepora	2021-10-13	18:00:00	5	HeatStress	1	33.1	8.09
A. millepora	2021-10-13	18:00:00	5	HeatStress	2	33.2	8.09
A. millepora	2021-10-13	18:00:00	5	HeatStress	3	33.2	8.1
A. millepora	2021-10-13	18:00:00	6	Control	1	28.7	8.05
A. millepora	2021-10-13	18:00:00	6	Control	2	28.7	8.05
A. millepora	2021-10-13	18:00:00	6	Control	3	28.7	8.05
A. millepora	2021-10-13	18:00:00	7	HeatStress	1	33.1	8.05
A. millepora	2021-10-13	18:00:00	7	HeatStress	2	33.1	8.05
A. millepora	2021-10-13	18:00:00	7	HeatStress	3	33.1	8.05
A. millepora	2021-10-13	18:00:00	8	Control	1	28.6	8.04
A. millepora	2021-10-13	18:00:00	8	Control	2	28.5	8.04
A. millepora	2021-10-13	18:00:00	8	Control	3	28.5	8.04
A. millepora	2021-10-14	10:30:00	1	Control	1	28.9	8.03
A. millepora	2021-10-14	10:30:00	1	Control	2	28.9	8.04
A. millepora	2021-10-14	10:30:00	1	Control	3	28.9	8.05
A. millepora	2021-10-14	10:30:00	2	Control	1	28.4	8.05
A. millepora	2021-10-14	10:30:00	2	Control	2	28.4	8.06
A. millepora	2021-10-14	10:30:00	2	Control	3	28.4	8.05
A. millepora	2021-10-14	10:30:00	3	HeatStress	1	33	8.02
A. millepora	2021-10-14	10:30:00	3	HeatStress	2	33	8.03
A. millepora	2021-10-14	10:30:00	3	HeatStress	3	33	8.03
A. millepora	2021-10-14	10:30:00	4	HeatStress	1	33.1	8
A. millepora	2021-10-14	10:30:00	4	HeatStress	2	33.1	8
A. millepora	2021-10-14	10:30:00	4	HeatStress	3	33.1	8
A. millepora	2021-10-14	10:30:00	5	HeatStress	1	33.2	8.02
A. millepora	2021-10-14	10:30:00	5	HeatStress	2	33.2	8
A. millepora	2021-10-14	10:30:00	5	HeatStress	3	33.1	8.03
A. millepora	2021-10-14	10:30:00	6	Control	1	28.6	8.06
A. millepora	2021-10-14	10:30:00	6	Control	2	28.6	8.06
A. millepora	2021-10-14	10:30:00	6	Control	3	28.6	8.06
A. millepora	2021-10-14	10:30:00	7	HeatStress	1	33.2	8.02
A. millepora	2021-10-14	10:30:00	7	HeatStress	2	33.2	8.02
A. millepora	2021-10-14	10:30:00	7	HeatStress	3	33.2	8.02
A. millepora	2021-10-14	10:30:00	8	Control	1	28.5	8.02
A. millepora	2021-10-14	10:30:00	8	Control	2	28.5	8.02
A. millepora	2021-10-14	10:30:00	8	Control	3	28.5	8.05
A. millepora	2021-10-14	13:00:00	1	Control	1	29.4	8.14
A. millepora	2021-10-14	13:00:00	1	Control	2	29.4	8.15
A. millepora	2021-10-14	13:00:00	1	Control	3	29.4	8.15
A. millepora	2021-10-14	13:00:00	2	Control	1	29.2	8.16
A. millepora	2021-10-14	13:00:00	2	Control	2	29.2	8.16
A. millepora	2021-10-14	13:00:00	2	Control	3	29.2	8.16
A. millepora	2021-10-14	13:00:00	3	HeatStress	1	33.1	8.14
A. millepora	2021-10-14	13:00:00	3	HeatStress	2	33.1	8.14
A. millepora	2021-10-14	13:00:00	3	HeatStress	3	33.1	8.14
A. millepora	2021-10-14	13:00:00	4	HeatStress	1	33.1	8.11
A. millepora	2021-10-14	13:00:00	4	HeatStress	2	33.1	8.11
A. millepora	2021-10-14	13:00:00	4	HeatStress	3	33.1	8.11
A. millepora	2021-10-14	13:00:00	5	HeatStress	1	33.3	8.1
A. millepora	2021-10-14	13:00:00	5	HeatStress	2	33.3	8.1
A. millepora	2021-10-14	13:00:00	5	HeatStress	3	33.2	8.1
A. millepora	2021-10-14	13:00:00	6	Control	1	29.5	8.14
A. millepora	2021-10-14	13:00:00	6	Control	2	29.5	8.15
A. millepora	2021-10-14	13:00:00	6	Control	3	29.5	8.15
A. millepora	2021-10-14	13:00:00	7	HeatStress	1	33.4	8.12
A. millepora	2021-10-14	13:00:00	7	HeatStress	2	33.4	8.12
A. millepora	2021-10-14	13:00:00	7	HeatStress	3	33.2	8.12
A. millepora	2021-10-14	13:00:00	8	Control	1	29	8.12
A. millepora	2021-10-14	13:00:00	8	Control	2	29	8.12
A. millepora	2021-10-14	13:00:00	8	Control	3	29.1	8.12
A. millepora	2021-10-14	18:30:00	1	Control	1	28.9	8.08
A. millepora	2021-10-14	18:30:00	1	Control	2	28.9	8.09
A. millepora	2021-10-14	18:30:00	1	Control	3	28.9	8.09
A. millepora	2021-10-14	18:30:00	2	Control	1	28.5	8.08
A. millepora	2021-10-14	18:30:00	2	Control	2	28.6	8.08
A. millepora	2021-10-14	18:30:00	2	Control	3	28.6	8.1
A. millepora	2021-10-14	18:30:00	3	HeatStress	1	33	8.11
A. millepora	2021-10-14	18:30:00	3	HeatStress	2	33	8.11
A. millepora	2021-10-14	18:30:00	3	HeatStress	3	33	8.11
A. millepora	2021-10-14	18:30:00	4	HeatStress	1	33.1	8.07
A. millepora	2021-10-14	18:30:00	4	HeatStress	2	33.1	8.07
A. millepora	2021-10-14	18:30:00	4	HeatStress	3	33.1	8.07
A. millepora	2021-10-14	18:30:00	5	HeatStress	1	33.1	8.08
A. millepora	2021-10-14	18:30:00	5	HeatStress	2	33.2	8.08
A. millepora	2021-10-14	18:30:00	5	HeatStress	3	33.2	8.08
A. millepora	2021-10-14	18:30:00	6	Control	1	28.7	8.1
A. millepora	2021-10-14	18:30:00	6	Control	2	28.7	8.1
A. millepora	2021-10-14	18:30:00	6	Control	3	28.8	8.1
A. millepora	2021-10-14	18:30:00	7	HeatStress	1	33.1	8.08
A. millepora	2021-10-14	18:30:00	7	HeatStress	2	33.2	8.08
A. millepora	2021-10-14	18:30:00	7	HeatStress	3	33.2	8.08
A. millepora	2021-10-14	18:30:00	8	Control	1	28.5	8.08
A. millepora	2021-10-14	18:30:00	8	Control	2	28.5	8.08
A. millepora	2021-10-14	18:30:00	8	Control	3	28.5	8.08
A. millepora	2021-10-15	10:00:00	1	Control	1	28.7	8.11
A. millepora	2021-10-15	10:00:00	1	Control	2	28.6	8.11
A. millepora	2021-10-15	10:00:00	1	Control	3	28.6	8.1
A. millepora	2021-10-15	10:00:00	2	Control	1	28.7	8.13
A. millepora	2021-10-15	10:00:00	2	Control	2	28.6	8.13
A. millepora	2021-10-15	10:00:00	2	Control	3	28.7	8.12
A. millepora	2021-10-15	10:00:00	3	HeatStress	1	32.9	8.11
A. millepora	2021-10-15	10:00:00	3	HeatStress	2	32.9	8.1
A. millepora	2021-10-15	10:00:00	3	HeatStress	3	32.9	8.1
A. millepora	2021-10-15	10:00:00	4	HeatStress	1	33.1	8.09
A. millepora	2021-10-15	10:00:00	4	HeatStress	2	33.1	8.09
A. millepora	2021-10-15	10:00:00	4	HeatStress	3	33.1	8.08
A. millepora	2021-10-15	10:00:00	5	HeatStress	1	33.2	8.05
A. millepora	2021-10-15	10:00:00	5	HeatStress	2	33.2	8.05
A. millepora	2021-10-15	10:00:00	5	HeatStress	3	33.2	8.04
A. millepora	2021-10-15	10:00:00	6	Control	1	28.7	8.13
A. millepora	2021-10-15	10:00:00	6	Control	2	28.6	8.13
A. millepora	2021-10-15	10:00:00	6	Control	3	28.6	8.13
A. millepora	2021-10-15	10:00:00	7	HeatStress	1	33.1	8.06
A. millepora	2021-10-15	10:00:00	7	HeatStress	2	33.2	8.06
A. millepora	2021-10-15	10:00:00	7	HeatStress	3	33.2	8.05
A. millepora	2021-10-15	10:00:00	8	Control	1	28.7	8.1
A. millepora	2021-10-15	10:00:00	8	Control	2	28.6	8.1
A. millepora	2021-10-15	10:00:00	8	Control	3	28.6	8.09
A. millepora	2021-10-15	14:00:00	1	Control	1	28.6	8.21
A. millepora	2021-10-15	14:00:00	1	Control	2	28.6	8.21
A. millepora	2021-10-15	14:00:00	1	Control	3	28.6	8.22
A. millepora	2021-10-15	14:00:00	2	Control	1	28.6	8.23
A. millepora	2021-10-15	14:00:00	2	Control	2	28.6	8.23
A. millepora	2021-10-15	14:00:00	2	Control	3	28.5	8.24
A. millepora	2021-10-15	14:00:00	3	HeatStress	1	33.2	8.2
A. millepora	2021-10-15	14:00:00	3	HeatStress	2	33.2	8.2
A. millepora	2021-10-15	14:00:00	3	HeatStress	3	33.2	8.2
A. millepora	2021-10-15	14:00:00	4	HeatStress	1	33.2	8.2
A. millepora	2021-10-15	14:00:00	4	HeatStress	2	33.2	8.2
A. millepora	2021-10-15	14:00:00	4	HeatStress	3	33.1	8.19
A. millepora	2021-10-15	14:00:00	5	HeatStress	1	33.2	8.18
A. millepora	2021-10-15	14:00:00	5	HeatStress	2	33.2	8.13
A. millepora	2021-10-15	14:00:00	5	HeatStress	3	33.2	8.12
A. millepora	2021-10-15	14:00:00	6	Control	1	28.7	8.2
A. millepora	2021-10-15	14:00:00	6	Control	2	28.7	8.2
A. millepora	2021-10-15	14:00:00	6	Control	3	28.6	8.21
A. millepora	2021-10-15	14:00:00	7	HeatStress	1	33.4	8.16
A. millepora	2021-10-15	14:00:00	7	HeatStress	2	33.4	8.16
A. millepora	2021-10-15	14:00:00	7	HeatStress	3	33.3	8.16
A. millepora	2021-10-15	14:00:00	8	Control	1	28.6	8.18
A. millepora	2021-10-15	14:00:00	8	Control	2	28.6	8.18
A. millepora	2021-10-15	14:00:00	8	Control	3	28.6	8.18
A. millepora	2021-10-15	18:30:00	1	Control	1	28.5	8.13
A. millepora	2021-10-15	18:30:00	1	Control	2	28.6	8.17
A. millepora	2021-10-15	18:30:00	1	Control	3	28.6	8.18
A. millepora	2021-10-15	18:30:00	2	Control	1	28.6	8.18
A. millepora	2021-10-15	18:30:00	2	Control	2	28.7	8.19
A. millepora	2021-10-15	18:30:00	2	Control	3	28.7	8.2
A. millepora	2021-10-15	18:30:00	3	HeatStress	1	33.1	8.18
A. millepora	2021-10-15	18:30:00	3	HeatStress	2	33.1	8.18
A. millepora	2021-10-15	18:30:00	3	HeatStress	3	33.1	8.18
A. millepora	2021-10-15	18:30:00	4	HeatStress	1	33	8.19
A. millepora	2021-10-15	18:30:00	4	HeatStress	2	33.1	8.17
A. millepora	2021-10-15	18:30:00	4	HeatStress	3	33.1	8.17
A. millepora	2021-10-15	18:30:00	5	HeatStress	1	33.1	8.13
A. millepora	2021-10-15	18:30:00	5	HeatStress	2	33.2	8.13
A. millepora	2021-10-15	18:30:00	5	HeatStress	3	33.2	8.13
A. millepora	2021-10-15	18:30:00	6	Control	1	28.8	8.18
A. millepora	2021-10-15	18:30:00	6	Control	2	28.7	8.18
A. millepora	2021-10-15	18:30:00	6	Control	3	28.7	8.18
A. millepora	2021-10-15	18:30:00	7	HeatStress	1	33.2	8.14
A. millepora	2021-10-15	18:30:00	7	HeatStress	2	33.3	8.14
A. millepora	2021-10-15	18:30:00	7	HeatStress	3	33.3	8.14
A. millepora	2021-10-15	18:30:00	8	Control	1	28.7	8.14
A. millepora	2021-10-15	18:30:00	8	Control	2	28.6	8.14
A. millepora	2021-10-15	18:30:00	8	Control	3	28.5	8.15
A. millepora	2021-10-16	11:00:00	1	Control	1	28.8	8.06
A. millepora	2021-10-16	11:00:00	1	Control	2	28.9	8.08
A. millepora	2021-10-16	11:00:00	1	Control	3	28.9	8.08
A. millepora	2021-10-16	11:00:00	2	Control	1	28.5	8.08
A. millepora	2021-10-16	11:00:00	2	Control	2	28.5	8.08
A. millepora	2021-10-16	11:00:00	2	Control	3	28.4	8.09
A. millepora	2021-10-16	11:00:00	3	HeatStress	1	33.2	8.04
A. millepora	2021-10-16	11:00:00	3	HeatStress	2	33.2	8.04
A. millepora	2021-10-16	11:00:00	3	HeatStress	3	33.2	8.04
A. millepora	2021-10-16	11:00:00	4	HeatStress	1	33.2	8.04
A. millepora	2021-10-16	11:00:00	4	HeatStress	2	33.1	8.05
A. millepora	2021-10-16	11:00:00	4	HeatStress	3	33	8.05
A. millepora	2021-10-16	11:00:00	5	HeatStress	1	33.1	8.01
A. millepora	2021-10-16	11:00:00	5	HeatStress	2	33.2	8.01
A. millepora	2021-10-16	11:00:00	5	HeatStress	3	33.2	8.01
A. millepora	2021-10-16	11:00:00	6	Control	1	28.7	8.09
A. millepora	2021-10-16	11:00:00	6	Control	2	28.7	8.09
A. millepora	2021-10-16	11:00:00	6	Control	3	28.6	8.1
A. millepora	2021-10-16	11:00:00	7	HeatStress	1	33.3	8
A. millepora	2021-10-16	11:00:00	7	HeatStress	2	33.3	8
A. millepora	2021-10-16	11:00:00	7	HeatStress	3	33.3	8
A. millepora	2021-10-16	11:00:00	8	Control	1	28.3	8.08
A. millepora	2021-10-16	11:00:00	8	Control	2	28.3	8.08
A. millepora	2021-10-16	11:00:00	8	Control	3	28.3	8.08
A. digitifera	2021-10-28	17:00:00	1	Control	1	28.8	8.08
A. digitifera	2021-10-28	17:00:00	1	Control	2	28.8	8.08
A. digitifera	2021-10-28	17:00:00	1	Control	3	28.8	8.06
A. digitifera	2021-10-28	17:00:00	2	Control	1	28.4	8.04
A. digitifera	2021-10-28	17:00:00	2	Control	2	28.4	8.03
A. digitifera	2021-10-28	17:00:00	2	Control	3	28.4	8.03
A. digitifera	2021-10-28	17:00:00	3	HeatStress	1	28.8	8.05
A. digitifera	2021-10-28	17:00:00	3	HeatStress	2	28.8	8.05
A. digitifera	2021-10-28	17:00:00	3	HeatStress	3	28.7	8.05
A. digitifera	2021-10-28	17:00:00	4	HeatStress	1	28.7	8.05
A. digitifera	2021-10-28	17:00:00	4	HeatStress	2	28.7	8.05
A. digitifera	2021-10-28	17:00:00	4	HeatStress	3	28.7	8.05
A. digitifera	2021-10-28	17:00:00	5	HeatStress	1	28.8	8.04
A. digitifera	2021-10-28	17:00:00	5	HeatStress	2	28.8	8.04
A. digitifera	2021-10-28	17:00:00	5	HeatStress	3	28.8	8.04
A. digitifera	2021-10-28	17:00:00	6	Control	1	28.6	8.02
A. digitifera	2021-10-28	17:00:00	6	Control	2	28.6	8.02
A. digitifera	2021-10-28	17:00:00	6	Control	3	28.7	8.01
A. digitifera	2021-10-28	17:00:00	7	HeatStress	1	28.7	8.01
A. digitifera	2021-10-28	17:00:00	7	HeatStress	2	28.7	8.01
A. digitifera	2021-10-28	17:00:00	7	HeatStress	3	28.6	8.01
A. digitifera	2021-10-28	17:00:00	8	Control	1	28.5	8.03
A. digitifera	2021-10-28	17:00:00	8	Control	2	28.5	8.03
A. digitifera	2021-10-28	17:00:00	8	Control	3	28.5	8.02
A. digitifera	2021-10-29	11:00:00	1	Control	1	28.9	8.03
A. digitifera	2021-10-29	11:00:00	1	Control	2	28.9	8.06
A. digitifera	2021-10-29	11:00:00	1	Control	3	28.8	8.05
A. digitifera	2021-10-29	11:00:00	2	Control	1	28.7	8.05
A. digitifera	2021-10-29	11:00:00	2	Control	2	28.7	8.06
A. digitifera	2021-10-29	11:00:00	2	Control	3	28.6	8.06
A. digitifera	2021-10-29	11:00:00	3	HeatStress	1	28.8	8.05
A. digitifera	2021-10-29	11:00:00	3	HeatStress	2	28.8	8.06
A. digitifera	2021-10-29	11:00:00	3	HeatStress	3	28.8	8.06
A. digitifera	2021-10-29	11:00:00	4	HeatStress	1	28.7	8.05
A. digitifera	2021-10-29	11:00:00	4	HeatStress	2	28.7	8.06
A. digitifera	2021-10-29	11:00:00	4	HeatStress	3	28.6	8.06
A. digitifera	2021-10-29	11:00:00	5	HeatStress	1	28.8	8.06
A. digitifera	2021-10-29	11:00:00	5	HeatStress	2	28.8	8.06
A. digitifera	2021-10-29	11:00:00	5	HeatStress	3	28.8	8.06
A. digitifera	2021-10-29	11:00:00	6	Control	1	28.7	8.04
A. digitifera	2021-10-29	11:00:00	6	Control	2	28.7	8.04
A. digitifera	2021-10-29	11:00:00	6	Control	3	28.8	8.04
A. digitifera	2021-10-29	11:00:00	7	HeatStress	1	28.6	8.05
A. digitifera	2021-10-29	11:00:00	7	HeatStress	2	28.6	8.05
A. digitifera	2021-10-29	11:00:00	7	HeatStress	3	28.6	8.05
A. digitifera	2021-10-29	11:00:00	8	Control	1	28.5	8.04
A. digitifera	2021-10-29	11:00:00	8	Control	2	28.5	8.04
A. digitifera	2021-10-29	11:00:00	8	Control	3	28.5	8.04
A. digitifera	2021-10-29	13:00:00	1	Control	1	28.8	8.01
A. digitifera	2021-10-29	13:00:00	1	Control	2	28.8	8.04
A. digitifera	2021-10-29	13:00:00	1	Control	3	28.8	8.03
A. digitifera	2021-10-29	13:00:00	2	Control	1	28.5	8.03
A. digitifera	2021-10-29	13:00:00	2	Control	2	28.5	8.03
A. digitifera	2021-10-29	13:00:00	2	Control	3	28.5	8.02
A. digitifera	2021-10-29	13:00:00	3	HeatStress	1	28.7	8.03
A. digitifera	2021-10-29	13:00:00	3	HeatStress	2	28.8	8.04
A. digitifera	2021-10-29	13:00:00	3	HeatStress	3	28.8	8.04
A. digitifera	2021-10-29	13:00:00	4	HeatStress	1	28.7	8.03
A. digitifera	2021-10-29	13:00:00	4	HeatStress	2	28.7	8.05
A. digitifera	2021-10-29	13:00:00	4	HeatStress	3	28.7	8.04
A. digitifera	2021-10-29	13:00:00	5	HeatStress	1	28.8	8.04
A. digitifera	2021-10-29	13:00:00	5	HeatStress	2	28.8	8.04
A. digitifera	2021-10-29	13:00:00	5	HeatStress	3	28.8	8.04
A. digitifera	2021-10-29	13:00:00	6	Control	1	28.8	8.02
A. digitifera	2021-10-29	13:00:00	6	Control	2	28.6	8.02
A. digitifera	2021-10-29	13:00:00	6	Control	3	28.6	8.02
A. digitifera	2021-10-29	13:00:00	7	HeatStress	1	28.7	8.03
A. digitifera	2021-10-29	13:00:00	7	HeatStress	2	28.7	8.03
A. digitifera	2021-10-29	13:00:00	7	HeatStress	3	28.6	8.03
A. digitifera	2021-10-29	13:00:00	8	Control	1	28.5	8.02
A. digitifera	2021-10-29	13:00:00	8	Control	2	28.5	8.02
A. digitifera	2021-10-29	13:00:00	8	Control	3	28.5	8.02
A. digitifera	2021-10-29	18:30:00	1	Control	1	28.6	7.98
A. digitifera	2021-10-29	18:30:00	1	Control	2	28.6	8
A. digitifera	2021-10-29	18:30:00	1	Control	3	28.6	8
A. digitifera	2021-10-29	18:30:00	2	Control	1	28.8	8.01
A. digitifera	2021-10-29	18:30:00	2	Control	2	28.8	8.02
A. digitifera	2021-10-29	18:30:00	2	Control	3	28.8	8.02
A. digitifera	2021-10-29	18:30:00	3	HeatStress	1	28.8	7.99
A. digitifera	2021-10-29	18:30:00	3	HeatStress	2	28.8	7.99
A. digitifera	2021-10-29	18:30:00	3	HeatStress	3	28.8	8.01
A. digitifera	2021-10-29	18:30:00	4	HeatStress	1	28.6	8.02
A. digitifera	2021-10-29	18:30:00	4	HeatStress	2	28.5	8.02
A. digitifera	2021-10-29	18:30:00	4	HeatStress	3	28.5	8.02
A. digitifera	2021-10-29	18:30:00	5	HeatStress	1	28.8	8.01
A. digitifera	2021-10-29	18:30:00	5	HeatStress	2	28.8	8.01
A. digitifera	2021-10-29	18:30:00	5	HeatStress	3	28.8	8.01
A. digitifera	2021-10-29	18:30:00	6	Control	1	28.6	7.96
A. digitifera	2021-10-29	18:30:00	6	Control	2	28.6	7.95
A. digitifera	2021-10-29	18:30:00	6	Control	3	28.6	7.95
A. digitifera	2021-10-29	18:30:00	7	HeatStress	1	28.6	7.93
A. digitifera	2021-10-29	18:30:00	7	HeatStress	2	28.6	7.93
A. digitifera	2021-10-29	18:30:00	7	HeatStress	3	28.6	7.93
A. digitifera	2021-10-29	18:30:00	8	Control	1	28.6	7.95
A. digitifera	2021-10-29	18:30:00	8	Control	2	28.6	7.95
A. digitifera	2021-10-29	18:30:00	8	Control	3	28.6	7.94
A. digitifera	2021-10-30	09:00:00	1	Control	1	28.9	8.07
A. digitifera	2021-10-30	09:00:00	1	Control	2	28.9	8.07
A. digitifera	2021-10-30	09:00:00	1	Control	3	28.9	8.07
A. digitifera	2021-10-30	09:00:00	2	Control	1	28.8	8.13
A. digitifera	2021-10-30	09:00:00	2	Control	2	28.8	8.12
A. digitifera	2021-10-30	09:00:00	2	Control	3	28.7	8.12
A. digitifera	2021-10-30	09:00:00	3	HeatStress	1	28.6	8.08
A. digitifera	2021-10-30	09:00:00	3	HeatStress	2	28.7	8.08
A. digitifera	2021-10-30	09:00:00	3	HeatStress	3	28.8	8.08
A. digitifera	2021-10-30	09:00:00	4	HeatStress	1	28.7	8.08
A. digitifera	2021-10-30	09:00:00	4	HeatStress	2	28.7	8.08
A. digitifera	2021-10-30	09:00:00	4	HeatStress	3	28.7	8.08
A. digitifera	2021-10-30	09:00:00	5	HeatStress	1	28.9	8.1
A. digitifera	2021-10-30	09:00:00	5	HeatStress	2	28.8	8.1
A. digitifera	2021-10-30	09:00:00	5	HeatStress	3	28.9	8.09
A. digitifera	2021-10-30	09:00:00	6	Control	1	28.7	8.07
A. digitifera	2021-10-30	09:00:00	6	Control	2	28.7	8.07
A. digitifera	2021-10-30	09:00:00	6	Control	3	28.7	8.07
A. digitifera	2021-10-30	09:00:00	7	HeatStress	1	28.6	8.08
A. digitifera	2021-10-30	09:00:00	7	HeatStress	2	28.6	8.08
A. digitifera	2021-10-30	09:00:00	7	HeatStress	3	28.6	8.08
A. digitifera	2021-10-30	09:00:00	8	Control	1	28.6	8.08
A. digitifera	2021-10-30	09:00:00	8	Control	2	28.5	8.08
A. digitifera	2021-10-30	09:00:00	8	Control	3	28.5	8.08
A. digitifera	2021-10-30	13:30:00	1	Control	1	28.9	8.09
A. digitifera	2021-10-30	13:30:00	1	Control	2	28.9	8.09
A. digitifera	2021-10-30	13:30:00	1	Control	3	28.9	8.09
A. digitifera	2021-10-30	13:30:00	2	Control	1	28.7	8.15
A. digitifera	2021-10-30	13:30:00	2	Control	2	28.8	8.14
A. digitifera	2021-10-30	13:30:00	2	Control	3	28.8	8.14
A. digitifera	2021-10-30	13:30:00	3	HeatStress	1	28.8	8.11
A. digitifera	2021-10-30	13:30:00	3	HeatStress	2	28.7	8.11
A. digitifera	2021-10-30	13:30:00	3	HeatStress	3	28.6	8.11
A. digitifera	2021-10-30	13:30:00	4	HeatStress	1	28.7	8.11
A. digitifera	2021-10-30	13:30:00	4	HeatStress	2	28.7	8.11
A. digitifera	2021-10-30	13:30:00	4	HeatStress	3	28.9	8.11
A. digitifera	2021-10-30	13:30:00	5	HeatStress	1	28.9	8.12
A. digitifera	2021-10-30	13:30:00	5	HeatStress	2	28.8	8.12
A. digitifera	2021-10-30	13:30:00	5	HeatStress	3	28.9	8.11
A. digitifera	2021-10-30	13:30:00	6	Control	1	28.7	8.09
A. digitifera	2021-10-30	13:30:00	6	Control	2	28.7	8.09
A. digitifera	2021-10-30	13:30:00	6	Control	3	28.7	8.11
A. digitifera	2021-10-30	13:30:00	7	HeatStress	1	28.6	8.11
A. digitifera	2021-10-30	13:30:00	7	HeatStress	2	28.6	8.11
A. digitifera	2021-10-30	13:30:00	7	HeatStress	3	28.6	8.11
A. digitifera	2021-10-30	13:30:00	8	Control	1	28.5	8.11
A. digitifera	2021-10-30	13:30:00	8	Control	2	28.5	8.11
A. digitifera	2021-10-30	13:30:00	8	Control	3	28.6	8.11
A. digitifera	2021-10-30	17:00:00	1	Control	1	28.9	8.12
A. digitifera	2021-10-30	17:00:00	1	Control	2	28.8	8.12
A. digitifera	2021-10-30	17:00:00	1	Control	3	28.8	8.13
A. digitifera	2021-10-30	17:00:00	2	Control	1	28.6	8.18
A. digitifera	2021-10-30	17:00:00	2	Control	2	28.6	8.18
A. digitifera	2021-10-30	17:00:00	2	Control	3	28.6	8.19
A. digitifera	2021-10-30	17:00:00	3	HeatStress	1	28.8	8.12
A. digitifera	2021-10-30	17:00:00	3	HeatStress	2	28.8	8.12
A. digitifera	2021-10-30	17:00:00	3	HeatStress	3	28.7	8.12
A. digitifera	2021-10-30	17:00:00	4	HeatStress	1	28.6	8.14
A. digitifera	2021-10-30	17:00:00	4	HeatStress	2	28.6	8.14
A. digitifera	2021-10-30	17:00:00	4	HeatStress	3	28.5	8.14
A. digitifera	2021-10-30	17:00:00	5	HeatStress	1	28.8	8.18
A. digitifera	2021-10-30	17:00:00	5	HeatStress	2	28.8	8.18
A. digitifera	2021-10-30	17:00:00	5	HeatStress	3	28.8	8.18
A. digitifera	2021-10-30	17:00:00	6	Control	1	28.6	8.11
A. digitifera	2021-10-30	17:00:00	6	Control	2	28.6	8.11
A. digitifera	2021-10-30	17:00:00	6	Control	3	28.6	8.12
A. digitifera	2021-10-30	17:00:00	7	HeatStress	1	28.8	8.13
A. digitifera	2021-10-30	17:00:00	7	HeatStress	2	28.8	8.13
A. digitifera	2021-10-30	17:00:00	7	HeatStress	3	28.8	8.13
A. digitifera	2021-10-30	17:00:00	8	Control	1	28.6	8.13
A. digitifera	2021-10-30	17:00:00	8	Control	2	28.6	8.13
A. digitifera	2021-10-30	17:00:00	8	Control	3	28.7	8.13
A. digitifera	2021-10-31	10:00:00	1	Control	1	28.9	8.1
A. digitifera	2021-10-31	10:00:00	1	Control	2	28.9	8.1
A. digitifera	2021-10-31	10:00:00	1	Control	3	28.9	8.11
A. digitifera	2021-10-31	10:00:00	2	Control	1	28.7	8.14
A. digitifera	2021-10-31	10:00:00	2	Control	2	28.7	8.13
A. digitifera	2021-10-31	10:00:00	2	Control	3	28.7	8.14
A. digitifera	2021-10-31	10:00:00	3	HeatStress	1	28.8	8.05
A. digitifera	2021-10-31	10:00:00	3	HeatStress	2	28.7	8.05
A. digitifera	2021-10-31	10:00:00	3	HeatStress	3	28.8	8.05
A. digitifera	2021-10-31	10:00:00	4	HeatStress	1	28.7	8.1
A. digitifera	2021-10-31	10:00:00	4	HeatStress	2	28.7	8.1
A. digitifera	2021-10-31	10:00:00	4	HeatStress	3	28.7	8.1
A. digitifera	2021-10-31	10:00:00	5	HeatStress	1	28.9	8.13
A. digitifera	2021-10-31	10:00:00	5	HeatStress	2	28.9	8.13
A. digitifera	2021-10-31	10:00:00	5	HeatStress	3	28.9	8.13
A. digitifera	2021-10-31	10:00:00	6	Control	1	28.6	8.08
A. digitifera	2021-10-31	10:00:00	6	Control	2	28.6	8.09
A. digitifera	2021-10-31	10:00:00	6	Control	3	28.7	8.09
A. digitifera	2021-10-31	10:00:00	7	HeatStress	1	28.8	8.1
A. digitifera	2021-10-31	10:00:00	7	HeatStress	2	28.8	8.1
A. digitifera	2021-10-31	10:00:00	7	HeatStress	3	28.8	8.1
A. digitifera	2021-10-31	10:00:00	8	Control	1	28.6	8.09
A. digitifera	2021-10-31	10:00:00	8	Control	2	28.7	8.09
A. digitifera	2021-10-31	10:00:00	8	Control	3	28.6	8.09
A. digitifera	2021-10-31	13:00:00	1	Control	1	28.9	8.15
A. digitifera	2021-10-31	13:00:00	1	Control	2	28.8	8.15
A. digitifera	2021-10-31	13:00:00	1	Control	3	28.9	8.15
A. digitifera	2021-10-31	13:00:00	2	Control	1	28.7	8.16
A. digitifera	2021-10-31	13:00:00	2	Control	2	28.8	8.16
A. digitifera	2021-10-31	13:00:00	2	Control	3	28.7	8.16
A. digitifera	2021-10-31	13:00:00	3	HeatStress	1	28.8	8.12
A. digitifera	2021-10-31	13:00:00	3	HeatStress	2	28.8	8.12
A. digitifera	2021-10-31	13:00:00	3	HeatStress	3	28.7	8.12
A. digitifera	2021-10-31	13:00:00	4	HeatStress	1	28.7	8.14
A. digitifera	2021-10-31	13:00:00	4	HeatStress	2	28.7	8.14
A. digitifera	2021-10-31	13:00:00	4	HeatStress	3	28.8	8.14
A. digitifera	2021-10-31	13:00:00	5	HeatStress	1	28.8	8.12
A. digitifera	2021-10-31	13:00:00	5	HeatStress	2	28.9	8.12
A. digitifera	2021-10-31	13:00:00	5	HeatStress	3	28.8	8.12
A. digitifera	2021-10-31	13:00:00	6	Control	1	28.6	8.13
A. digitifera	2021-10-31	13:00:00	6	Control	2	28.6	8.13
A. digitifera	2021-10-31	13:00:00	6	Control	3	28.8	8.13
A. digitifera	2021-10-31	13:00:00	7	HeatStress	1	28.8	8.14
A. digitifera	2021-10-31	13:00:00	7	HeatStress	2	28.8	8.14
A. digitifera	2021-10-31	13:00:00	7	HeatStress	3	28.8	8.14
A. digitifera	2021-10-31	13:00:00	8	Control	1	28.6	8.12
A. digitifera	2021-10-31	13:00:00	8	Control	2	28.7	8.12
A. digitifera	2021-10-31	13:00:00	8	Control	3	28.6	8.12
A. digitifera	2021-10-31	17:00:00	1	Control	1	28.8	8.14
A. digitifera	2021-10-31	17:00:00	1	Control	2	28.8	8.14
A. digitifera	2021-10-31	17:00:00	1	Control	3	28.9	8.14
A. digitifera	2021-10-31	17:00:00	2	Control	1	28.6	8.19
A. digitifera	2021-10-31	17:00:00	2	Control	2	28.6	8.19
A. digitifera	2021-10-31	17:00:00	2	Control	3	28.6	8.19
A. digitifera	2021-10-31	17:00:00	3	HeatStress	1	28.7	8.11
A. digitifera	2021-10-31	17:00:00	3	HeatStress	2	28.7	8.11
A. digitifera	2021-10-31	17:00:00	3	HeatStress	3	28.8	8.11
A. digitifera	2021-10-31	17:00:00	4	HeatStress	1	28.6	8.15
A. digitifera	2021-10-31	17:00:00	4	HeatStress	2	28.6	8.15
A. digitifera	2021-10-31	17:00:00	4	HeatStress	3	28.6	8.15
A. digitifera	2021-10-31	17:00:00	5	HeatStress	1	28.8	8.11
A. digitifera	2021-10-31	17:00:00	5	HeatStress	2	28.8	8.11
A. digitifera	2021-10-31	17:00:00	5	HeatStress	3	28.8	8.12
A. digitifera	2021-10-31	17:00:00	6	Control	1	28.6	8.12
A. digitifera	2021-10-31	17:00:00	6	Control	2	28.6	8.12
A. digitifera	2021-10-31	17:00:00	6	Control	3	28.6	8.12
A. digitifera	2021-10-31	17:00:00	7	HeatStress	1	28.8	8.16
A. digitifera	2021-10-31	17:00:00	7	HeatStress	2	28.8	8.17
A. digitifera	2021-10-31	17:00:00	7	HeatStress	3	28.8	8.17
A. digitifera	2021-10-31	17:00:00	8	Control	1	28.6	8.1
A. digitifera	2021-10-31	17:00:00	8	Control	2	28.7	8.11
A. digitifera	2021-10-31	17:00:00	8	Control	3	28.6	8.1
A. digitifera	2021-11-01	08:00:00	1	Control	1	28.3	8.02
A. digitifera	2021-11-01	08:00:00	1	Control	2	28.3	8.04
A. digitifera	2021-11-01	08:00:00	1	Control	3	28.3	8.04
A. digitifera	2021-11-01	08:00:00	2	Control	1	28.8	8.08
A. digitifera	2021-11-01	08:00:00	2	Control	2	28.8	8.08
A. digitifera	2021-11-01	08:00:00	2	Control	3	28.8	8.08
A. digitifera	2021-11-01	08:00:00	3	HeatStress	1	30.3	8.02
A. digitifera	2021-11-01	08:00:00	3	HeatStress	2	30.3	8.02
A. digitifera	2021-11-01	08:00:00	3	HeatStress	3	30.1	8.02
A. digitifera	2021-11-01	08:00:00	4	HeatStress	1	30.1	8.03
A. digitifera	2021-11-01	08:00:00	4	HeatStress	2	30.1	8.03
A. digitifera	2021-11-01	08:00:00	4	HeatStress	3	30.1	8.03
A. digitifera	2021-11-01	08:00:00	5	HeatStress	1	30.1	8.06
A. digitifera	2021-11-01	08:00:00	5	HeatStress	2	30.1	8.06
A. digitifera	2021-11-01	08:00:00	5	HeatStress	3	30.1	8.06
A. digitifera	2021-11-01	08:00:00	6	Control	1	28.6	8.02
A. digitifera	2021-11-01	08:00:00	6	Control	2	28.6	8.02
A. digitifera	2021-11-01	08:00:00	6	Control	3	28.6	8.02
A. digitifera	2021-11-01	08:00:00	7	HeatStress	1	30.3	8.05
A. digitifera	2021-11-01	08:00:00	7	HeatStress	2	30.3	8.05
A. digitifera	2021-11-01	08:00:00	7	HeatStress	3	30.3	8.05
A. digitifera	2021-11-01	08:00:00	8	Control	1	28.6	8.05
A. digitifera	2021-11-01	08:00:00	8	Control	2	28.6	8.05
A. digitifera	2021-11-01	08:00:00	8	Control	3	28.5	8.05
A. digitifera	2021-11-01	13:00:00	1	Control	1	28.4	8.14
A. digitifera	2021-11-01	13:00:00	1	Control	2	28.4	8.14
A. digitifera	2021-11-01	13:00:00	1	Control	3	28.5	8.15
A. digitifera	2021-11-01	13:00:00	2	Control	1	28.5	8.19
A. digitifera	2021-11-01	13:00:00	2	Control	2	28.5	8.19
A. digitifera	2021-11-01	13:00:00	2	Control	3	28.5	8.2
A. digitifera	2021-11-01	13:00:00	3	HeatStress	1	30.3	8.13
A. digitifera	2021-11-01	13:00:00	3	HeatStress	2	30.3	8.13
A. digitifera	2021-11-01	13:00:00	3	HeatStress	3	30.3	8.13
A. digitifera	2021-11-01	13:00:00	4	HeatStress	1	30.1	8.14
A. digitifera	2021-11-01	13:00:00	4	HeatStress	2	30.1	8.14
A. digitifera	2021-11-01	13:00:00	4	HeatStress	3	30.1	8.14
A. digitifera	2021-11-01	13:00:00	5	HeatStress	1	30.1	8.16
A. digitifera	2021-11-01	13:00:00	5	HeatStress	2	30.1	8.16
A. digitifera	2021-11-01	13:00:00	5	HeatStress	3	30.1	8.16
A. digitifera	2021-11-01	13:00:00	6	Control	1	28.5	8.11
A. digitifera	2021-11-01	13:00:00	6	Control	2	28.5	8.11
A. digitifera	2021-11-01	13:00:00	6	Control	3	28.5	8.11
A. digitifera	2021-11-01	13:00:00	7	HeatStress	1	30.4	8.15
A. digitifera	2021-11-01	13:00:00	7	HeatStress	2	30.4	8.15
A. digitifera	2021-11-01	13:00:00	7	HeatStress	3	30.5	8.15
A. digitifera	2021-11-01	13:00:00	8	Control	1	28.4	8.15
A. digitifera	2021-11-01	13:00:00	8	Control	2	28.4	8.14
A. digitifera	2021-11-01	13:00:00	8	Control	3	28.4	8.14
A. digitifera	2021-11-01	16:00:00	1	Control	1	28.7	8.16
A. digitifera	2021-11-01	16:00:00	1	Control	2	28.7	8.16
A. digitifera	2021-11-01	16:00:00	1	Control	3	28.6	8.17
A. digitifera	2021-11-01	16:00:00	2	Control	1	28.6	8.22
A. digitifera	2021-11-01	16:00:00	2	Control	2	28.6	8.22
A. digitifera	2021-11-01	16:00:00	2	Control	3	28.6	8.22
A. digitifera	2021-11-01	16:00:00	3	HeatStress	1	30.2	8.15
A. digitifera	2021-11-01	16:00:00	3	HeatStress	2	30.2	8.15
A. digitifera	2021-11-01	16:00:00	3	HeatStress	3	30.1	8.15
A. digitifera	2021-11-01	16:00:00	4	HeatStress	1	30.2	8.18
A. digitifera	2021-11-01	16:00:00	4	HeatStress	2	30.2	8.18
A. digitifera	2021-11-01	16:00:00	4	HeatStress	3	30.1	8.18
A. digitifera	2021-11-01	16:00:00	5	HeatStress	1	29.9	8.18
A. digitifera	2021-11-01	16:00:00	5	HeatStress	2	29.9	8.18
A. digitifera	2021-11-01	16:00:00	5	HeatStress	3	29.9	8.19
A. digitifera	2021-11-01	16:00:00	6	Control	1	28.6	8.14
A. digitifera	2021-11-01	16:00:00	6	Control	2	28.6	8.14
A. digitifera	2021-11-01	16:00:00	6	Control	3	28.6	8.15
A. digitifera	2021-11-01	16:00:00	7	HeatStress	1	30.4	8.18
A. digitifera	2021-11-01	16:00:00	7	HeatStress	2	30.4	8.18
A. digitifera	2021-11-01	16:00:00	7	HeatStress	3	30.4	8.18
A. digitifera	2021-11-01	16:00:00	8	Control	1	28.6	8.15
A. digitifera	2021-11-01	16:00:00	8	Control	2	28.6	8.15
A. digitifera	2021-11-01	16:00:00	8	Control	3	28.5	8.15
A. digitifera	2021-11-02	08:00:00	1	Control	1	28.6	8.08
A. digitifera	2021-11-02	08:00:00	1	Control	2	28.6	8.08
A. digitifera	2021-11-02	08:00:00	1	Control	3	28.6	8.08
A. digitifera	2021-11-02	08:00:00	2	Control	1	28.7	8.11
A. digitifera	2021-11-02	08:00:00	2	Control	2	28.6	8.11
A. digitifera	2021-11-02	08:00:00	2	Control	3	28.6	8.11
A. digitifera	2021-11-02	08:00:00	3	HeatStress	1	31.2	8.06
A. digitifera	2021-11-02	08:00:00	3	HeatStress	2	31.1	8.06
A. digitifera	2021-11-02	08:00:00	3	HeatStress	3	31.1	8.07
A. digitifera	2021-11-02	08:00:00	4	HeatStress	1	31.2	8.08
A. digitifera	2021-11-02	08:00:00	4	HeatStress	2	31.1	8.08
A. digitifera	2021-11-02	08:00:00	4	HeatStress	3	31.1	8.08
A. digitifera	2021-11-02	08:00:00	5	HeatStress	1	31	8.09
A. digitifera	2021-11-02	08:00:00	5	HeatStress	2	31.1	8.09
A. digitifera	2021-11-02	08:00:00	5	HeatStress	3	31	8.09
A. digitifera	2021-11-02	08:00:00	6	Control	1	28.6	8.08
A. digitifera	2021-11-02	08:00:00	6	Control	2	28.6	8.08
A. digitifera	2021-11-02	08:00:00	6	Control	3	28.6	8.08
A. digitifera	2021-11-02	08:00:00	7	HeatStress	1	31.3	8.16
A. digitifera	2021-11-02	08:00:00	7	HeatStress	2	31.3	8.16
A. digitifera	2021-11-02	08:00:00	7	HeatStress	3	31.3	8.16
A. digitifera	2021-11-02	08:00:00	8	Control	1	28.6	8.08
A. digitifera	2021-11-02	08:00:00	8	Control	2	28.6	8.08
A. digitifera	2021-11-02	08:00:00	8	Control	3	28.6	8.08
A. digitifera	2021-11-02	13:00:00	1	Control	1	28.6	8.13
A. digitifera	2021-11-02	13:00:00	1	Control	2	28.6	8.14
A. digitifera	2021-11-02	13:00:00	1	Control	3	28.6	8.14
A. digitifera	2021-11-02	13:00:00	2	Control	1	28.6	8.16
A. digitifera	2021-11-02	13:00:00	2	Control	2	28.6	8.16
A. digitifera	2021-11-02	13:00:00	2	Control	3	28.7	8.17
A. digitifera	2021-11-02	13:00:00	3	HeatStress	1	31.1	8.11
A. digitifera	2021-11-02	13:00:00	3	HeatStress	2	31.1	8.11
A. digitifera	2021-11-02	13:00:00	3	HeatStress	3	31.1	8.11
A. digitifera	2021-11-02	13:00:00	4	HeatStress	1	31.1	8.14
A. digitifera	2021-11-02	13:00:00	4	HeatStress	2	31.1	8.14
A. digitifera	2021-11-02	13:00:00	4	HeatStress	3	31.1	8.14
A. digitifera	2021-11-02	13:00:00	5	HeatStress	1	31.1	8.11
A. digitifera	2021-11-02	13:00:00	5	HeatStress	2	31.1	8.11
A. digitifera	2021-11-02	13:00:00	5	HeatStress	3	31.1	8.11
A. digitifera	2021-11-02	13:00:00	6	Control	1	28.9	8.11
A. digitifera	2021-11-02	13:00:00	6	Control	2	28.9	8.11
A. digitifera	2021-11-02	13:00:00	6	Control	3	28.9	8.11
A. digitifera	2021-11-02	13:00:00	7	HeatStress	1	31.2	8.15
A. digitifera	2021-11-02	13:00:00	7	HeatStress	2	31.1	8.16
A. digitifera	2021-11-02	13:00:00	7	HeatStress	3	31.1	8.16
A. digitifera	2021-11-02	13:00:00	8	Control	1	28.6	8.11
A. digitifera	2021-11-02	13:00:00	8	Control	2	28.6	8.11
A. digitifera	2021-11-02	13:00:00	8	Control	3	28.6	8.1
A. digitifera	2021-11-02	16:00:00	1	Control	1	28.7	8.14
A. digitifera	2021-11-02	16:00:00	1	Control	2	28.7	8.14
A. digitifera	2021-11-02	16:00:00	1	Control	3	28.6	8.14
A. digitifera	2021-11-02	16:00:00	2	Control	1	28.8	8.19
A. digitifera	2021-11-02	16:00:00	2	Control	2	28.8	8.19
A. digitifera	2021-11-02	16:00:00	2	Control	3	28.8	8.18
A. digitifera	2021-11-02	16:00:00	3	HeatStress	1	31.1	8.11
A. digitifera	2021-11-02	16:00:00	3	HeatStress	2	31.1	8.11
A. digitifera	2021-11-02	16:00:00	3	HeatStress	3	31.1	8.11
A. digitifera	2021-11-02	16:00:00	4	HeatStress	1	31	8.15
A. digitifera	2021-11-02	16:00:00	4	HeatStress	2	31	8.15
A. digitifera	2021-11-02	16:00:00	4	HeatStress	3	31	8.15
A. digitifera	2021-11-02	16:00:00	5	HeatStress	1	31	8.11
A. digitifera	2021-11-02	16:00:00	5	HeatStress	2	31	8.11
A. digitifera	2021-11-02	16:00:00	5	HeatStress	3	31	8.11
A. digitifera	2021-11-02	16:00:00	6	Control	1	28.9	8.12
A. digitifera	2021-11-02	16:00:00	6	Control	2	28.9	8.12
A. digitifera	2021-11-02	16:00:00	6	Control	3	28.7	8.12
A. digitifera	2021-11-02	16:00:00	7	HeatStress	1	31.2	8.16
A. digitifera	2021-11-02	16:00:00	7	HeatStress	2	31.2	8.17
A. digitifera	2021-11-02	16:00:00	7	HeatStress	3	31.2	8.17
A. digitifera	2021-11-02	16:00:00	8	Control	1	28.6	8.1
A. digitifera	2021-11-02	16:00:00	8	Control	2	28.6	8.1
A. digitifera	2021-11-02	16:00:00	8	Control	3	28.6	8.1
A. digitifera	2021-11-03	08:00:00	1	Control	1	28.4	8.09
A. digitifera	2021-11-03	08:00:00	1	Control	2	28.4	8.09
A. digitifera	2021-11-03	08:00:00	1	Control	3	28.4	8.1
A. digitifera	2021-11-03	08:00:00	2	Control	1	28.6	8.1
A. digitifera	2021-11-03	08:00:00	2	Control	2	28.6	8.1
A. digitifera	2021-11-03	08:00:00	2	Control	3	28.5	8.1
A. digitifera	2021-11-03	08:00:00	3	HeatStress	1	32.2	8.07
A. digitifera	2021-11-03	08:00:00	3	HeatStress	2	32.2	8.07
A. digitifera	2021-11-03	08:00:00	3	HeatStress	3	32.1	8.07
A. digitifera	2021-11-03	08:00:00	4	HeatStress	1	32	8.08
A. digitifera	2021-11-03	08:00:00	4	HeatStress	2	32	8.08
A. digitifera	2021-11-03	08:00:00	4	HeatStress	3	32	8.07
A. digitifera	2021-11-03	08:00:00	5	HeatStress	1	32	8.08
A. digitifera	2021-11-03	08:00:00	5	HeatStress	2	32	8.08
A. digitifera	2021-11-03	08:00:00	5	HeatStress	3	32	8.08
A. digitifera	2021-11-03	08:00:00	6	Control	1	28.6	8.07
A. digitifera	2021-11-03	08:00:00	6	Control	2	28.8	8.07
A. digitifera	2021-11-03	08:00:00	6	Control	3	28.6	8.07
A. digitifera	2021-11-03	08:00:00	7	HeatStress	1	32.3	8.08
A. digitifera	2021-11-03	08:00:00	7	HeatStress	2	32	8.08
A. digitifera	2021-11-03	08:00:00	7	HeatStress	3	31.9	8.1
A. digitifera	2021-11-03	08:00:00	8	Control	1	28.6	8.09
A. digitifera	2021-11-03	08:00:00	8	Control	2	28.6	8.09
A. digitifera	2021-11-03	08:00:00	8	Control	3	28.5	8.09
A. digitifera	2021-11-03	13:00:00	1	Control	1	28.5	8.17
A. digitifera	2021-11-03	13:00:00	1	Control	2	28.5	8.19
A. digitifera	2021-11-03	13:00:00	1	Control	3	28.5	8.19
A. digitifera	2021-11-03	13:00:00	2	Control	1	28.7	8.19
A. digitifera	2021-11-03	13:00:00	2	Control	2	28.7	8.19
A. digitifera	2021-11-03	13:00:00	2	Control	3	28.7	8.19
A. digitifera	2021-11-03	13:00:00	3	HeatStress	1	32.1	8.14
A. digitifera	2021-11-03	13:00:00	3	HeatStress	2	32.1	8.14
A. digitifera	2021-11-03	13:00:00	3	HeatStress	3	32.1	8.14
A. digitifera	2021-11-03	13:00:00	4	HeatStress	1	32	8.16
A. digitifera	2021-11-03	13:00:00	4	HeatStress	2	32	8.16
A. digitifera	2021-11-03	13:00:00	4	HeatStress	3	32	8.16
A. digitifera	2021-11-03	13:00:00	5	HeatStress	1	32	8.16
A. digitifera	2021-11-03	13:00:00	5	HeatStress	2	32	8.16
A. digitifera	2021-11-03	13:00:00	5	HeatStress	3	32	8.17
A. digitifera	2021-11-03	13:00:00	6	Control	1	28.8	8.16
A. digitifera	2021-11-03	13:00:00	6	Control	2	28.8	8.16
A. digitifera	2021-11-03	13:00:00	6	Control	3	28.8	8.16
A. digitifera	2021-11-03	13:00:00	7	HeatStress	1	32.2	8.16
A. digitifera	2021-11-03	13:00:00	7	HeatStress	2	32.2	8.16
A. digitifera	2021-11-03	13:00:00	7	HeatStress	3	32.1	8.17
A. digitifera	2021-11-03	13:00:00	8	Control	1	28.6	8.17
A. digitifera	2021-11-03	13:00:00	8	Control	2	28.6	8.17
A. digitifera	2021-11-03	13:00:00	8	Control	3	28.6	8.16
A. digitifera	2021-11-03	16:00:00	1	Control	1	28.3	8.22
A. digitifera	2021-11-03	16:00:00	1	Control	2	28.3	8.22
A. digitifera	2021-11-03	16:00:00	1	Control	3	28.3	8.23
A. digitifera	2021-11-03	16:00:00	2	Control	1	28.8	8.23
A. digitifera	2021-11-03	16:00:00	2	Control	2	28.8	8.23
A. digitifera	2021-11-03	16:00:00	2	Control	3	28.7	8.23
A. digitifera	2021-11-03	16:00:00	3	HeatStress	1	32	8.16
A. digitifera	2021-11-03	16:00:00	3	HeatStress	2	32	8.16
A. digitifera	2021-11-03	16:00:00	3	HeatStress	3	32	8.17
A. digitifera	2021-11-03	16:00:00	4	HeatStress	1	32	8.19
A. digitifera	2021-11-03	16:00:00	4	HeatStress	2	32	8.19
A. digitifera	2021-11-03	16:00:00	4	HeatStress	3	31.8	8.19
A. digitifera	2021-11-03	16:00:00	5	HeatStress	1	32.2	8.2
A. digitifera	2021-11-03	16:00:00	5	HeatStress	2	32.2	8.2
A. digitifera	2021-11-03	16:00:00	5	HeatStress	3	32	8.2
A. digitifera	2021-11-03	16:00:00	6	Control	1	28.5	8.18
A. digitifera	2021-11-03	16:00:00	6	Control	2	28.5	8.18
A. digitifera	2021-11-03	16:00:00	6	Control	3	28.5	8.18
A. digitifera	2021-11-03	16:00:00	7	HeatStress	1	32.3	8.23
A. digitifera	2021-11-03	16:00:00	7	HeatStress	2	32.3	8.23
A. digitifera	2021-11-03	16:00:00	7	HeatStress	3	32.2	8.21
A. digitifera	2021-11-03	16:00:00	8	Control	1	28.6	8.19
A. digitifera	2021-11-03	16:00:00	8	Control	2	28.6	8.19
A. digitifera	2021-11-03	16:00:00	8	Control	3	28.5	8.18
A. digitifera	2021-11-04	09:00:00	1	Control	1	28.5	8.08
A. digitifera	2021-11-04	09:00:00	1	Control	2	28.5	8.08
A. digitifera	2021-11-04	09:00:00	1	Control	3	28.4	8.09
A. digitifera	2021-11-04	09:00:00	2	Control	1	28.8	8.1
A. digitifera	2021-11-04	09:00:00	2	Control	2	28.8	8.1
A. digitifera	2021-11-04	09:00:00	2	Control	3	28.6	8.1
A. digitifera	2021-11-04	09:00:00	3	HeatStress	1	33.3	8.08
A. digitifera	2021-11-04	09:00:00	3	HeatStress	2	33.3	8.08
A. digitifera	2021-11-04	09:00:00	3	HeatStress	3	33.1	8.08
A. digitifera	2021-11-04	09:00:00	4	HeatStress	1	33	8.07
A. digitifera	2021-11-04	09:00:00	4	HeatStress	2	33	8.07
A. digitifera	2021-11-04	09:00:00	4	HeatStress	3	33	8.07
A. digitifera	2021-11-04	09:00:00	5	HeatStress	1	33	8.08
A. digitifera	2021-11-04	09:00:00	5	HeatStress	2	33	8.08
A. digitifera	2021-11-04	09:00:00	5	HeatStress	3	33	8.08
A. digitifera	2021-11-04	09:00:00	6	Control	1	28.7	8.09
A. digitifera	2021-11-04	09:00:00	6	Control	2	28.7	8.09
A. digitifera	2021-11-04	09:00:00	6	Control	3	28.7	8.09
A. digitifera	2021-11-04	09:00:00	7	HeatStress	1	33.2	8.08
A. digitifera	2021-11-04	09:00:00	7	HeatStress	2	33.2	8.08
A. digitifera	2021-11-04	09:00:00	7	HeatStress	3	33	8.08
A. digitifera	2021-11-04	09:00:00	8	Control	1	28.7	8.1
A. digitifera	2021-11-04	09:00:00	8	Control	2	28.7	8.1
A. digitifera	2021-11-04	09:00:00	8	Control	3	28.6	8.1
A. digitifera	2021-11-04	13:00:00	1	Control	1	28.2	8.18
A. digitifera	2021-11-04	13:00:00	1	Control	2	28.2	8.18
A. digitifera	2021-11-04	13:00:00	1	Control	3	28.2	8.19
A. digitifera	2021-11-04	13:00:00	2	Control	1	28.8	8.17
A. digitifera	2021-11-04	13:00:00	2	Control	2	28.8	8.17
A. digitifera	2021-11-04	13:00:00	2	Control	3	28.7	8.17
A. digitifera	2021-11-04	13:00:00	3	HeatStress	1	32.8	8.18
A. digitifera	2021-11-04	13:00:00	3	HeatStress	2	32.6	8.18
A. digitifera	2021-11-04	13:00:00	3	HeatStress	3	32.6	8.17
A. digitifera	2021-11-04	13:00:00	4	HeatStress	1	33	8.15
A. digitifera	2021-11-04	13:00:00	4	HeatStress	2	33	8.15
A. digitifera	2021-11-04	13:00:00	4	HeatStress	3	32.9	8.15
A. digitifera	2021-11-04	13:00:00	5	HeatStress	1	33.1	8.15
A. digitifera	2021-11-04	13:00:00	5	HeatStress	2	33.1	8.15
A. digitifera	2021-11-04	13:00:00	5	HeatStress	3	33.1	8.15
A. digitifera	2021-11-04	13:00:00	6	Control	1	28.8	8.16
A. digitifera	2021-11-04	13:00:00	6	Control	2	28.8	8.16
A. digitifera	2021-11-04	13:00:00	6	Control	3	28.7	8.16
A. digitifera	2021-11-04	13:00:00	7	HeatStress	1	33.1	8.16
A. digitifera	2021-11-04	13:00:00	7	HeatStress	2	33.1	8.16
A. digitifera	2021-11-04	13:00:00	7	HeatStress	3	33	8.15
A. digitifera	2021-11-04	13:00:00	8	Control	1	28.6	8.17
A. digitifera	2021-11-04	13:00:00	8	Control	2	28.6	8.17
A. digitifera	2021-11-04	13:00:00	8	Control	3	28.5	8.16
A. digitifera	2021-11-04	16:30:00	1	Control	1	28.2	8.21
A. digitifera	2021-11-04	16:30:00	1	Control	2	28.2	8.21
A. digitifera	2021-11-04	16:30:00	1	Control	3	28.2	8.22
A. digitifera	2021-11-04	16:30:00	2	Control	1	28.7	8.2
A. digitifera	2021-11-04	16:30:00	2	Control	2	28.7	8.2
A. digitifera	2021-11-04	16:30:00	2	Control	3	28.7	8.2
A. digitifera	2021-11-04	16:30:00	3	HeatStress	1	32.7	8.17
A. digitifera	2021-11-04	16:30:00	3	HeatStress	2	32.7	8.17
A. digitifera	2021-11-04	16:30:00	3	HeatStress	3	32.6	8.17
A. digitifera	2021-11-04	16:30:00	4	HeatStress	1	33.1	8.17
A. digitifera	2021-11-04	16:30:00	4	HeatStress	2	33.1	8.17
A. digitifera	2021-11-04	16:30:00	4	HeatStress	3	33	8.17
A. digitifera	2021-11-04	16:30:00	5	HeatStress	1	33.1	8.18
A. digitifera	2021-11-04	16:30:00	5	HeatStress	2	33	8.18
A. digitifera	2021-11-04	16:30:00	5	HeatStress	3	33	8.18
A. digitifera	2021-11-04	16:30:00	6	Control	1	28.7	8.18
A. digitifera	2021-11-04	16:30:00	6	Control	2	28.7	8.18
A. digitifera	2021-11-04	16:30:00	6	Control	3	28.7	8.18
A. digitifera	2021-11-04	16:30:00	7	HeatStress	1	33.4	8.18
A. digitifera	2021-11-04	16:30:00	7	HeatStress	2	33.4	8.18
A. digitifera	2021-11-04	16:30:00	7	HeatStress	3	33.3	8.18
A. digitifera	2021-11-04	16:30:00	8	Control	1	28.7	8.18
A. digitifera	2021-11-04	16:30:00	8	Control	2	28.7	8.18
A. digitifera	2021-11-04	16:30:00	8	Control	3	28.5	8.18
A. digitifera	2021-11-05	08:30:00	1	Control	1	28.5	8.08
A. digitifera	2021-11-05	08:30:00	1	Control	2	28.5	8.08
A. digitifera	2021-11-05	08:30:00	1	Control	3	28.5	8.09
A. digitifera	2021-11-05	08:30:00	2	Control	1	28.5	8.08
A. digitifera	2021-11-05	08:30:00	2	Control	2	28.5	8.08
A. digitifera	2021-11-05	08:30:00	2	Control	3	28.5	8.08
A. digitifera	2021-11-05	08:30:00	3	HeatStress	1	33.1	8.06
[truncated: 377 more rows]

## Sheet: TS03
Species	Start of experiment	Date	Day elapsed	Colony	Treatment	N fragment	Bleached fragments	Healthy fragments
A. tenuis	2021-11-14	2021-11-14	0	ATEN01	Control	8	0	8
A. tenuis	2021-11-14	2021-11-14	0	ATEN02	Control	8	0	8
A. tenuis	2021-11-14	2021-11-14	0	ATEN03	Control	8	0	8
A. tenuis	2021-11-14	2021-11-14	0	ATEN04	Control	8	0	8
A. tenuis	2021-11-14	2021-11-14	0	ATEN05	Control	8	0	8
A. tenuis	2021-11-14	2021-11-14	0	ATEN06	Control	8	0	8
A. tenuis	2021-11-14	2021-11-14	0	ATEN07	Control	8	0	8
A. tenuis	2021-11-14	2021-11-14	0	ATEN08	Control	8	0	8
A. tenuis	2021-11-14	2021-11-14	0	ATEN09	Control	8	0	8
A. tenuis	2021-11-14	2021-11-14	0	ATEN10	Control	8	0	8
A. tenuis	2021-11-14	2021-11-14	0	ATEN11	Control	8	0	8
A. tenuis	2021-11-14	2021-11-14	0	ATEN12	Control	8	0	8
A. tenuis	2021-11-14	2021-11-14	0	ATEN13	Control	8	0	8
A. tenuis	2021-11-14	2021-11-14	0	ATEN14	Control	8	0	8
A. tenuis	2021-11-14	2021-11-14	0	ATEN15	Control	8	0	8
A. tenuis	2021-11-14	2021-11-14	0	ATEN16	Control	8	0	8
A. tenuis	2021-11-14	2021-11-14	0	ATEN17	Control	8	0	8
A. tenuis	2021-11-14	2021-11-14	0	ATEN18	Control	8	0	8
A. tenuis	2021-11-14	2021-11-14	0	ATEN19	Control	8	0	8
A. tenuis	2021-11-14	2021-11-14	0	ATEN20	Control	8	0	8
A. tenuis	2021-11-14	2021-11-14	0	ATEN21	Control	8	0	8
A. tenuis	2021-11-14	2021-11-14	0	ATEN22	Control	8	0	8
A. tenuis	2021-11-14	2021-11-14	0	ATEN23	Control	8	0	8
A. tenuis	2021-11-14	2021-11-14	0	ATEN24	Control	8	0	8
A. tenuis	2021-11-14	2021-11-14	0	ATEN25	Control	8	0	8
A. tenuis	2021-11-14	2021-11-14	0	ATEN26	Control	8	0	8
A. tenuis	2021-11-14	2021-11-14	0	ATEN27	Control	8	0	8
A. tenuis	2021-11-14	2021-11-14	0	ATEN28	Control	8	0	8
A. tenuis	2021-11-14	2021-11-14	0	ATEN29	Control	8	0	8
A. tenuis	2021-11-14	2021-11-14	0	ATEN30	Control	8	0	8
A. tenuis	2021-11-14	2021-11-14	0	ATEN01	Heat-stressed	8	0	8
A. tenuis	2021-11-14	2021-11-14	0	ATEN02	Heat-stressed	8	0	8
A. tenuis	2021-11-14	2021-11-14	0	ATEN03	Heat-stressed	8	0	8
A. tenuis	2021-11-14	2021-11-14	0	ATEN04	Heat-stressed	8	0	8
A. tenuis	2021-11-14	2021-11-14	0	ATEN05	Heat-stressed	8	0	8
A. tenuis	2021-11-14	2021-11-14	0	ATEN06	Heat-stressed	8	0	8
A. tenuis	2021-11-14	2021-11-14	0	ATEN07	Heat-stressed	8	0	8
A. tenuis	2021-11-14	2021-11-14	0	ATEN08	Heat-stressed	8	0	8
A. tenuis	2021-11-14	2021-11-14	0	ATEN09	Heat-stressed	8	0	8
A. tenuis	2021-11-14	2021-11-14	0	ATEN10	Heat-stressed	8	0	8
A. tenuis	2021-11-14	2021-11-14	0	ATEN11	Heat-stressed	8	0	8
A. tenuis	2021-11-14	2021-11-14	0	ATEN12	Heat-stressed	8	0	8
A. tenuis	2021-11-14	2021-11-14	0	ATEN13	Heat-stressed	8	0	8
A. tenuis	2021-11-14	2021-11-14	0	ATEN14	Heat-stressed	8	0	8
A. tenuis	2021-11-14	2021-11-14	0	ATEN15	Heat-stressed	8	0	8
A. tenuis	2021-11-14	2021-11-14	0	ATEN16	Heat-stressed	8	0	8
A. tenuis	2021-11-14	2021-11-14	0	ATEN17	Heat-stressed	8	0	8
A. tenuis	2021-11-14	2021-11-14	0	ATEN18	Heat-stressed	8	0	8
A. tenuis	2021-11-14	2021-11-14	0	ATEN19	Heat-stressed	7	0	7
A. tenuis	2021-11-14	2021-11-14	0	ATEN20	Heat-stressed	8	0	8
A. tenuis	2021-11-14	2021-11-14	0	ATEN21	Heat-stressed	7	0	7
A. tenuis	2021-11-14	2021-11-14	0	ATEN22	Heat-stressed	8	0	8
A. tenuis	2021-11-14	2021-11-14	0	ATEN23	Heat-stressed	8	0	8
A. tenuis	2021-11-14	2021-11-14	0	ATEN24	Heat-stressed	7	0	7
A. tenuis	2021-11-14	2021-11-14	0	ATEN25	Heat-stressed	8	0	8
A. tenuis	2021-11-14	2021-11-14	0	ATEN26	Heat-stressed	8	0	8
A. tenuis	2021-11-14	2021-11-14	0	ATEN27	Heat-stressed	8	0	8
A. tenuis	2021-11-14	2021-11-14	0	ATEN28	Heat-stressed	8	0	8
A. tenuis	2021-11-14	2021-11-14	0	ATEN29	Heat-stressed	8	0	8
A. tenuis	2021-11-14	2021-11-14	0	ATEN30	Heat-stressed	8	0	8
A. tenuis	2021-11-14	2021-11-15	1	ATEN01	Control	8	0	8
A. tenuis	2021-11-14	2021-11-15	1	ATEN02	Control	8	0	8
A. tenuis	2021-11-14	2021-11-15	1	ATEN03	Control	8	0	8
A. tenuis	2021-11-14	2021-11-15	1	ATEN04	Control	8	0	8
A. tenuis	2021-11-14	2021-11-15	1	ATEN05	Control	8	0	8
A. tenuis	2021-11-14	2021-11-15	1	ATEN06	Control	8	0	8
A. tenuis	2021-11-14	2021-11-15	1	ATEN07	Control	8	0	8
A. tenuis	2021-11-14	2021-11-15	1	ATEN08	Control	8	0	8
A. tenuis	2021-11-14	2021-11-15	1	ATEN09	Control	8	0	8
A. tenuis	2021-11-14	2021-11-15	1	ATEN10	Control	8	0	8
A. tenuis	2021-11-14	2021-11-15	1	ATEN11	Control	8	0	8
A. tenuis	2021-11-14	2021-11-15	1	ATEN12	Control	8	0	8
A. tenuis	2021-11-14	2021-11-15	1	ATEN13	Control	8	0	8
A. tenuis	2021-11-14	2021-11-15	1	ATEN14	Control	8	0	8
A. tenuis	2021-11-14	2021-11-15	1	ATEN15	Control	8	0	8
A. tenuis	2021-11-14	2021-11-15	1	ATEN16	Control	8	0	8
A. tenuis	2021-11-14	2021-11-15	1	ATEN17	Control	8	0	8
A. tenuis	2021-11-14	2021-11-15	1	ATEN18	Control	8	0	8
A. tenuis	2021-11-14	2021-11-15	1	ATEN19	Control	8	0	8
A. tenuis	2021-11-14	2021-11-15	1	ATEN20	Control	8	0	8
A. tenuis	2021-11-14	2021-11-15	1	ATEN21	Control	8	0	8
A. tenuis	2021-11-14	2021-11-15	1	ATEN22	Control	8	0	8
A. tenuis	2021-11-14	2021-11-15	1	ATEN23	Control	8	0	8
A. tenuis	2021-11-14	2021-11-15	1	ATEN24	Control	8	0	8
A. tenuis	2021-11-14	2021-11-15	1	ATEN25	Control	8	0	8
A. tenuis	2021-11-14	2021-11-15	1	ATEN26	Control	8	0	8
A. tenuis	2021-11-14	2021-11-15	1	ATEN27	Control	8	0	8
A. tenuis	2021-11-14	2021-11-15	1	ATEN28	Control	8	0	8
A. tenuis	2021-11-14	2021-11-15	1	ATEN29	Control	8	0	8
A. tenuis	2021-11-14	2021-11-15	1	ATEN30	Control	8	0	8
A. tenuis	2021-11-14	2021-11-15	1	ATEN01	Heat-stressed	8	0	8
A. tenuis	2021-11-14	2021-11-15	1	ATEN02	Heat-stressed	8	0	8
A. tenuis	2021-11-14	2021-11-15	1	ATEN03	Heat-stressed	8	0	8
A. tenuis	2021-11-14	2021-11-15	1	ATEN04	Heat-stressed	8	0	8
A. tenuis	2021-11-14	2021-11-15	1	ATEN05	Heat-stressed	8	0	8
A. tenuis	2021-11-14	2021-11-15	1	ATEN06	Heat-stressed	8	0	8
A. tenuis	2021-11-14	2021-11-15	1	ATEN07	Heat-stressed	8	0	8
A. tenuis	2021-11-14	2021-11-15	1	ATEN08	Heat-stressed	8	0	8
A. tenuis	2021-11-14	2021-11-15	1	ATEN09	Heat-stressed	8	0	8
A. tenuis	2021-11-14	2021-11-15	1	ATEN10	Heat-stressed	8	0	8
A. tenuis	2021-11-14	2021-11-15	1	ATEN11	Heat-stressed	8	0	8
A. tenuis	2021-11-14	2021-11-15	1	ATEN12	Heat-stressed	8	0	8
A. tenuis	2021-11-14	2021-11-15	1	ATEN13	Heat-stressed	8	0	8
A. tenuis	2021-11-14	2021-11-15	1	ATEN14	Heat-stressed	8	0	8
A. tenuis	2021-11-14	2021-11-15	1	ATEN15	Heat-stressed	8	0	8
A. tenuis	2021-11-14	2021-11-15	1	ATEN16	Heat-stressed	8	0	8
A. tenuis	2021-11-14	2021-11-15	1	ATEN17	Heat-stressed	8	0	8
A. tenuis	2021-11-14	2021-11-15	1	ATEN18	Heat-stressed	8	0	8
A. tenuis	2021-11-14	2021-11-15	1	ATEN19	Heat-stressed	7	0	7
A. tenuis	2021-11-14	2021-11-15	1	ATEN20	Heat-stressed	8	0	8
A. tenuis	2021-11-14	2021-11-15	1	ATEN21	Heat-stressed	7	0	7
A. tenuis	2021-11-14	2021-11-15	1	ATEN22	Heat-stressed	8	0	8
A. tenuis	2021-11-14	2021-11-15	1	ATEN23	Heat-stressed	8	0	8
A. tenuis	2021-11-14	2021-11-15	1	ATEN24	Heat-stressed	7	0	7
A. tenuis	2021-11-14	2021-11-15	1	ATEN25	Heat-stressed	8	0	8
A. tenuis	2021-11-14	2021-11-15	1	ATEN26	Heat-stressed	8	0	8
A. tenuis	2021-11-14	2021-11-15	1	ATEN27	Heat-stressed	8	0	8
A. tenuis	2021-11-14	2021-11-15	1	ATEN28	Heat-stressed	8	0	8
A. tenuis	2021-11-14	2021-11-15	1	ATEN29	Heat-stressed	8	0	8
A. tenuis	2021-11-14	2021-11-15	1	ATEN30	Heat-stressed	8	0	8
A. tenuis	2021-11-14	2021-11-16	2	ATEN01	Control	8	0	8
A. tenuis	2021-11-14	2021-11-16	2	ATEN02	Control	8	0	8
A. tenuis	2021-11-14	2021-11-16	2	ATEN03	Control	8	0	8
A. tenuis	2021-11-14	2021-11-16	2	ATEN04	Control	8	0	8
A. tenuis	2021-11-14	2021-11-16	2	ATEN05	Control	8	0	8
A. tenuis	2021-11-14	2021-11-16	2	ATEN06	Control	8	0	8
A. tenuis	2021-11-14	2021-11-16	2	ATEN07	Control	8	0	8
A. tenuis	2021-11-14	2021-11-16	2	ATEN08	Control	8	0	8
A. tenuis	2021-11-14	2021-11-16	2	ATEN09	Control	8	0	8
A. tenuis	2021-11-14	2021-11-16	2	ATEN10	Control	8	0	8
A. tenuis	2021-11-14	2021-11-16	2	ATEN11	Control	8	0	8
A. tenuis	2021-11-14	2021-11-16	2	ATEN12	Control	8	0	8
A. tenuis	2021-11-14	2021-11-16	2	ATEN13	Control	8	0	8
A. tenuis	2021-11-14	2021-11-16	2	ATEN14	Control	8	0	8
A. tenuis	2021-11-14	2021-11-16	2	ATEN15	Control	8	0	8
A. tenuis	2021-11-14	2021-11-16	2	ATEN16	Control	8	0	8
A. tenuis	2021-11-14	2021-11-16	2	ATEN17	Control	8	0	8
A. tenuis	2021-11-14	2021-11-16	2	ATEN18	Control	8	0	8
A. tenuis	2021-11-14	2021-11-16	2	ATEN19	Control	8	0	8
A. tenuis	2021-11-14	2021-11-16	2	ATEN20	Control	8	0	8
A. tenuis	2021-11-14	2021-11-16	2	ATEN21	Control	8	0	8
A. tenuis	2021-11-14	2021-11-16	2	ATEN22	Control	8	0	8
A. tenuis	2021-11-14	2021-11-16	2	ATEN23	Control	8	0	8
A. tenuis	2021-11-14	2021-11-16	2	ATEN24	Control	8	0	8
A. tenuis	2021-11-14	2021-11-16	2	ATEN25	Control	8	0	8
A. tenuis	2021-11-14	2021-11-16	2	ATEN26	Control	8	0	8
A. tenuis	2021-11-14	2021-11-16	2	ATEN27	Control	8	0	8
A. tenuis	2021-11-14	2021-11-16	2	ATEN28	Control	8	0	8
A. tenuis	2021-11-14	2021-11-16	2	ATEN29	Control	8	0	8
A. tenuis	2021-11-14	2021-11-16	2	ATEN30	Control	8	0	8
A. tenuis	2021-11-14	2021-11-16	2	ATEN01	Heat-stressed	8	0	8
A. tenuis	2021-11-14	2021-11-16	2	ATEN02	Heat-stressed	8	0	8
A. tenuis	2021-11-14	2021-11-16	2	ATEN03	Heat-stressed	8	0	8
A. tenuis	2021-11-14	2021-11-16	2	ATEN04	Heat-stressed	8	0	8
A. tenuis	2021-11-14	2021-11-16	2	ATEN05	Heat-stressed	8	0	8
A. tenuis	2021-11-14	2021-11-16	2	ATEN06	Heat-stressed	8	0	8
A. tenuis	2021-11-14	2021-11-16	2	ATEN07	Heat-stressed	8	0	8
A. tenuis	2021-11-14	2021-11-16	2	ATEN08	Heat-stressed	8	0	8
A. tenuis	2021-11-14	2021-11-16	2	ATEN09	Heat-stressed	8	0	8
A. tenuis	2021-11-14	2021-11-16	2	ATEN10	Heat-stressed	8	0	8
A. tenuis	2021-11-14	2021-11-16	2	ATEN11	Heat-stressed	8	0	8
A. tenuis	2021-11-14	2021-11-16	2	ATEN12	Heat-stressed	8	0	8
A. tenuis	2021-11-14	2021-11-16	2	ATEN13	Heat-stressed	8	0	8
A. tenuis	2021-11-14	2021-11-16	2	ATEN14	Heat-stressed	8	0	8
A. tenuis	2021-11-14	2021-11-16	2	ATEN15	Heat-stressed	8	0	8
A. tenuis	2021-11-14	2021-11-16	2	ATEN16	Heat-stressed	8	0	8
A. tenuis	2021-11-14	2021-11-16	2	ATEN17	Heat-stressed	8	0	8
A. tenuis	2021-11-14	2021-11-16	2	ATEN18	Heat-stressed	8	0	8
A. tenuis	2021-11-14	2021-11-16	2	ATEN19	Heat-stressed	7	0	7
A. tenuis	2021-11-14	2021-11-16	2	ATEN20	Heat-stressed	8	0	8
A. tenuis	2021-11-14	2021-11-16	2	ATEN21	Heat-stressed	7	0	7
A. tenuis	2021-11-14	2021-11-16	2	ATEN22	Heat-stressed	8	0	8
A. tenuis	2021-11-14	2021-11-16	2	ATEN23	Heat-stressed	8	0	8
A. tenuis	2021-11-14	2021-11-16	2	ATEN24	Heat-stressed	7	0	7
A. tenuis	2021-11-14	2021-11-16	2	ATEN25	Heat-stressed	8	0	8
A. tenuis	2021-11-14	2021-11-16	2	ATEN26	Heat-stressed	8	0	8
A. tenuis	2021-11-14	2021-11-16	2	ATEN27	Heat-stressed	8	0	8
A. tenuis	2021-11-14	2021-11-16	2	ATEN28	Heat-stressed	8	0	8
A. tenuis	2021-11-14	2021-11-16	2	ATEN29	Heat-stressed	8	0	8
A. tenuis	2021-11-14	2021-11-16	2	ATEN30	Heat-stressed	8	0	8
A. tenuis	2021-11-14	2021-11-17	3	ATEN01	Control	8	0	8
A. tenuis	2021-11-14	2021-11-17	3	ATEN02	Control	8	0	8
A. tenuis	2021-11-14	2021-11-17	3	ATEN03	Control	8	0	8
A. tenuis	2021-11-14	2021-11-17	3	ATEN04	Control	8	0	8
A. tenuis	2021-11-14	2021-11-17	3	ATEN05	Control	8	0	8
A. tenuis	2021-11-14	2021-11-17	3	ATEN06	Control	8	0	8
A. tenuis	2021-11-14	2021-11-17	3	ATEN07	Control	8	0	8
A. tenuis	2021-11-14	2021-11-17	3	ATEN08	Control	8	0	8
A. tenuis	2021-11-14	2021-11-17	3	ATEN09	Control	8	0	8
A. tenuis	2021-11-14	2021-11-17	3	ATEN10	Control	8	0	8
A. tenuis	2021-11-14	2021-11-17	3	ATEN11	Control	8	0	8
A. tenuis	2021-11-14	2021-11-17	3	ATEN12	Control	8	0	8
A. tenuis	2021-11-14	2021-11-17	3	ATEN13	Control	8	0	8
A. tenuis	2021-11-14	2021-11-17	3	ATEN14	Control	8	0	8
A. tenuis	2021-11-14	2021-11-17	3	ATEN15	Control	8	0	8
A. tenuis	2021-11-14	2021-11-17	3	ATEN16	Control	8	0	8
A. tenuis	2021-11-14	2021-11-17	3	ATEN17	Control	8	0	8
A. tenuis	2021-11-14	2021-11-17	3	ATEN18	Control	8	0	8
A. tenuis	2021-11-14	2021-11-17	3	ATEN19	Control	8	0	8
A. tenuis	2021-11-14	2021-11-17	3	ATEN20	Control	8	0	8
A. tenuis	2021-11-14	2021-11-17	3	ATEN21	Control	8	0	8
A. tenuis	2021-11-14	2021-11-17	3	ATEN22	Control	8	0	8
A. tenuis	2021-11-14	2021-11-17	3	ATEN23	Control	8	0	8
A. tenuis	2021-11-14	2021-11-17	3	ATEN24	Control	8	0	8
A. tenuis	2021-11-14	2021-11-17	3	ATEN25	Control	8	0	8
A. tenuis	2021-11-14	2021-11-17	3	ATEN26	Control	8	0	8
A. tenuis	2021-11-14	2021-11-17	3	ATEN27	Control	8	0	8
A. tenuis	2021-11-14	2021-11-17	3	ATEN28	Control	8	0	8
A. tenuis	2021-11-14	2021-11-17	3	ATEN29	Control	8	0	8
A. tenuis	2021-11-14	2021-11-17	3	ATEN30	Control	8	0	8
A. tenuis	2021-11-14	2021-11-17	3	ATEN01	Heat-stressed	8	0	8
A. tenuis	2021-11-14	2021-11-17	3	ATEN02	Heat-stressed	8	0	8
A. tenuis	2021-11-14	2021-11-17	3	ATEN03	Heat-stressed	8	0	8
A. tenuis	2021-11-14	2021-11-17	3	ATEN04	Heat-stressed	8	0	8
A. tenuis	2021-11-14	2021-11-17	3	ATEN05	Heat-stressed	8	0	8
A. tenuis	2021-11-14	2021-11-17	3	ATEN06	Heat-stressed	8	0	8
A. tenuis	2021-11-14	2021-11-17	3	ATEN07	Heat-stressed	8	0	8
A. tenuis	2021-11-14	2021-11-17	3	ATEN08	Heat-stressed	8	0	8
A. tenuis	2021-11-14	2021-11-17	3	ATEN09	Heat-stressed	8	0	8
A. tenuis	2021-11-14	2021-11-17	3	ATEN10	Heat-stressed	8	0	8
A. tenuis	2021-11-14	2021-11-17	3	ATEN11	Heat-stressed	8	0	8
A. tenuis	2021-11-14	2021-11-17	3	ATEN12	Heat-stressed	8	0	8
A. tenuis	2021-11-14	2021-11-17	3	ATEN13	Heat-stressed	8	0	8
A. tenuis	2021-11-14	2021-11-17	3	ATEN14	Heat-stressed	8	0	8
A. tenuis	2021-11-14	2021-11-17	3	ATEN15	Heat-stressed	8	0	8
A. tenuis	2021-11-14	2021-11-17	3	ATEN16	Heat-stressed	8	0	8
A. tenuis	2021-11-14	2021-11-17	3	ATEN17	Heat-stressed	8	0	8
A. tenuis	2021-11-14	2021-11-17	3	ATEN18	Heat-stressed	8	0	8
A. tenuis	2021-11-14	2021-11-17	3	ATEN19	Heat-stressed	7	0	7
A. tenuis	2021-11-14	2021-11-17	3	ATEN20	Heat-stressed	8	0	8
A. tenuis	2021-11-14	2021-11-17	3	ATEN21	Heat-stressed	7	0	7
A. tenuis	2021-11-14	2021-11-17	3	ATEN22	Heat-stressed	8	0	8
A. tenuis	2021-11-14	2021-11-17	3	ATEN23	Heat-stressed	8	0	8
A. tenuis	2021-11-14	2021-11-17	3	ATEN24	Heat-stressed	7	0	7
A. tenuis	2021-11-14	2021-11-17	3	ATEN25	Heat-stressed	8	0	8
A. tenuis	2021-11-14	2021-11-17	3	ATEN26	Heat-stressed	8	0	8
A. tenuis	2021-11-14	2021-11-17	3	ATEN27	Heat-stressed	8	0	8
A. tenuis	2021-11-14	2021-11-17	3	ATEN28	Heat-stressed	8	0	8
A. tenuis	2021-11-14	2021-11-17	3	ATEN29	Heat-stressed	8	0	8
A. tenuis	2021-11-14	2021-11-17	3	ATEN30	Heat-stressed	8	0	8
A. tenuis	2021-11-14	2021-11-18	4	ATEN01	Control	8	0	8
A. tenuis	2021-11-14	2021-11-18	4	ATEN02	Control	8	0	8
A. tenuis	2021-11-14	2021-11-18	4	ATEN03	Control	8	0	8
A. tenuis	2021-11-14	2021-11-18	4	ATEN04	Control	8	0	8
A. tenuis	2021-11-14	2021-11-18	4	ATEN05	Control	8	0	8
A. tenuis	2021-11-14	2021-11-18	4	ATEN06	Control	8	0	8
A. tenuis	2021-11-14	2021-11-18	4	ATEN07	Control	8	1	7
A. tenuis	2021-11-14	2021-11-18	4	ATEN08	Control	8	2	6
A. tenuis	2021-11-14	2021-11-18	4	ATEN09	Control	8	0	8
A. tenuis	2021-11-14	2021-11-18	4	ATEN10	Control	8	0	8
A. tenuis	2021-11-14	2021-11-18	4	ATEN11	Control	8	0	8
A. tenuis	2021-11-14	2021-11-18	4	ATEN12	Control	8	0	8
A. tenuis	2021-11-14	2021-11-18	4	ATEN13	Control	8	0	8
A. tenuis	2021-11-14	2021-11-18	4	ATEN14	Control	8	0	8
A. tenuis	2021-11-14	2021-11-18	4	ATEN15	Control	8	0	8
A. tenuis	2021-11-14	2021-11-18	4	ATEN16	Control	8	0	8
A. tenuis	2021-11-14	2021-11-18	4	ATEN17	Control	8	0	8
A. tenuis	2021-11-14	2021-11-18	4	ATEN18	Control	8	0	8
A. tenuis	2021-11-14	2021-11-18	4	ATEN19	Control	8	0	8
A. tenuis	2021-11-14	2021-11-18	4	ATEN20	Control	8	0	8
A. tenuis	2021-11-14	2021-11-18	4	ATEN21	Control	8	0	8
A. tenuis	2021-11-14	2021-11-18	4	ATEN22	Control	8	0	8
A. tenuis	2021-11-14	2021-11-18	4	ATEN23	Control	8	0	8
A. tenuis	2021-11-14	2021-11-18	4	ATEN24	Control	8	1	7
A. tenuis	2021-11-14	2021-11-18	4	ATEN25	Control	8	2	6
A. tenuis	2021-11-14	2021-11-18	4	ATEN26	Control	8	0	8
A. tenuis	2021-11-14	2021-11-18	4	ATEN27	Control	8	0	8
A. tenuis	2021-11-14	2021-11-18	4	ATEN28	Control	8	0	8
A. tenuis	2021-11-14	2021-11-18	4	ATEN29	Control	8	0	8
A. tenuis	2021-11-14	2021-11-18	4	ATEN30	Control	8	0	8
A. tenuis	2021-11-14	2021-11-18	4	ATEN01	Heat-stressed	8	0	8
A. tenuis	2021-11-14	2021-11-18	4	ATEN02	Heat-stressed	8	0	8
A. tenuis	2021-11-14	2021-11-18	4	ATEN03	Heat-stressed	8	0	8
A. tenuis	2021-11-14	2021-11-18	4	ATEN04	Heat-stressed	8	0	8
A. tenuis	2021-11-14	2021-11-18	4	ATEN05	Heat-stressed	8	0	8
A. tenuis	2021-11-14	2021-11-18	4	ATEN06	Heat-stressed	8	0	8
A. tenuis	2021-11-14	2021-11-18	4	ATEN07	Heat-stressed	8	0	8
A. tenuis	2021-11-14	2021-11-18	4	ATEN08	Heat-stressed	8	1	7
A. tenuis	2021-11-14	2021-11-18	4	ATEN09	Heat-stressed	8	0	8
A. tenuis	2021-11-14	2021-11-18	4	ATEN10	Heat-stressed	8	0	8
A. tenuis	2021-11-14	2021-11-18	4	ATEN11	Heat-stressed	8	0	8
A. tenuis	2021-11-14	2021-11-18	4	ATEN12	Heat-stressed	8	0	8
A. tenuis	2021-11-14	2021-11-18	4	ATEN13	Heat-stressed	8	0	8
A. tenuis	2021-11-14	2021-11-18	4	ATEN14	Heat-stressed	8	0	8
A. tenuis	2021-11-14	2021-11-18	4	ATEN15	Heat-stressed	8	0	8
A. tenuis	2021-11-14	2021-11-18	4	ATEN16	Heat-stressed	8	0	8
A. tenuis	2021-11-14	2021-11-18	4	ATEN17	Heat-stressed	8	0	8
A. tenuis	2021-11-14	2021-11-18	4	ATEN18	Heat-stressed	8	0	8
A. tenuis	2021-11-14	2021-11-18	4	ATEN19	Heat-stressed	7	0	7
A. tenuis	2021-11-14	2021-11-18	4	ATEN20	Heat-stressed	8	0	8
A. tenuis	2021-11-14	2021-11-18	4	ATEN21	Heat-stressed	7	0	7
A. tenuis	2021-11-14	2021-11-18	4	ATEN22	Heat-stressed	8	0	8
A. tenuis	2021-11-14	2021-11-18	4	ATEN23	Heat-stressed	8	0	8
A. tenuis	2021-11-14	2021-11-18	4	ATEN24	Heat-stressed	7	1	6
A. tenuis	2021-11-14	2021-11-18	4	ATEN25	Heat-stressed	8	1	7
A. tenuis	2021-11-14	2021-11-18	4	ATEN26	Heat-stressed	8	0	8
A. tenuis	2021-11-14	2021-11-18	4	ATEN27	Heat-stressed	8	0	8
A. tenuis	2021-11-14	2021-11-18	4	ATEN28	Heat-stressed	8	0	8
A. tenuis	2021-11-14	2021-11-18	4	ATEN29	Heat-stressed	8	0	8
A. tenuis	2021-11-14	2021-11-18	4	ATEN30	Heat-stressed	8	0	8
A. tenuis	2021-11-14	2021-11-19	5	ATEN01	Control	8	0	8
A. tenuis	2021-11-14	2021-11-19	5	ATEN02	Control	8	0	8
A. tenuis	2021-11-14	2021-11-19	5	ATEN03	Control	8	0	8
A. tenuis	2021-11-14	2021-11-19	5	ATEN04	Control	8	0	8
A. tenuis	2021-11-14	2021-11-19	5	ATEN05	Control	8	0	8
A. tenuis	2021-11-14	2021-11-19	5	ATEN06	Control	8	0	8
A. tenuis	2021-11-14	2021-11-19	5	ATEN07	Control	8	1	7
A. tenuis	2021-11-14	2021-11-19	5	ATEN08	Control	8	2	6
A. tenuis	2021-11-14	2021-11-19	5	ATEN09	Control	8	0	8
A. tenuis	2021-11-14	2021-11-19	5	ATEN10	Control	8	0	8
A. tenuis	2021-11-14	2021-11-19	5	ATEN11	Control	8	0	8
A. tenuis	2021-11-14	2021-11-19	5	ATEN12	Control	8	0	8
A. tenuis	2021-11-14	2021-11-19	5	ATEN13	Control	8	0	8
A. tenuis	2021-11-14	2021-11-19	5	ATEN14	Control	8	0	8
A. tenuis	2021-11-14	2021-11-19	5	ATEN15	Control	8	0	8
A. tenuis	2021-11-14	2021-11-19	5	ATEN16	Control	8	0	8
A. tenuis	2021-11-14	2021-11-19	5	ATEN17	Control	8	0	8
A. tenuis	2021-11-14	2021-11-19	5	ATEN18	Control	8	0	8
A. tenuis	2021-11-14	2021-11-19	5	ATEN19	Control	8	0	8
A. tenuis	2021-11-14	2021-11-19	5	ATEN20	Control	8	0	8
A. tenuis	2021-11-14	2021-11-19	5	ATEN21	Control	8	0	8
A. tenuis	2021-11-14	2021-11-19	5	ATEN22	Control	8	0	8
A. tenuis	2021-11-14	2021-11-19	5	ATEN23	Control	8	0	8
A. tenuis	2021-11-14	2021-11-19	5	ATEN24	Control	8	1	7
A. tenuis	2021-11-14	2021-11-19	5	ATEN25	Control	8	2	6
A. tenuis	2021-11-14	2021-11-19	5	ATEN26	Control	8	0	8
A. tenuis	2021-11-14	2021-11-19	5	ATEN27	Control	8	0	8
A. tenuis	2021-11-14	2021-11-19	5	ATEN28	Control	8	0	8
A. tenuis	2021-11-14	2021-11-19	5	ATEN29	Control	8	0	8
A. tenuis	2021-11-14	2021-11-19	5	ATEN30	Control	8	0	8
A. tenuis	2021-11-14	2021-11-19	5	ATEN01	Heat-stressed	8	0	8
A. tenuis	2021-11-14	2021-11-19	5	ATEN02	Heat-stressed	8	0	8
A. tenuis	2021-11-14	2021-11-19	5	ATEN03	Heat-stressed	8	0	8
A. tenuis	2021-11-14	2021-11-19	5	ATEN04	Heat-stressed	8	0	8
A. tenuis	2021-11-14	2021-11-19	5	ATEN05	Heat-stressed	8	0	8
A. tenuis	2021-11-14	2021-11-19	5	ATEN06	Heat-stressed	8	0	8
A. tenuis	2021-11-14	2021-11-19	5	ATEN07	Heat-stressed	8	0	8
A. tenuis	2021-11-14	2021-11-19	5	ATEN08	Heat-stressed	8	1	7
A. tenuis	2021-11-14	2021-11-19	5	ATEN09	Heat-stressed	8	0	8
A. tenuis	2021-11-14	2021-11-19	5	ATEN10	Heat-stressed	8	0	8
A. tenuis	2021-11-14	2021-11-19	5	ATEN11	Heat-stressed	8	0	8
A. tenuis	2021-11-14	2021-11-19	5	ATEN12	Heat-stressed	8	0	8
A. tenuis	2021-11-14	2021-11-19	5	ATEN13	Heat-stressed	8	0	8
A. tenuis	2021-11-14	2021-11-19	5	ATEN14	Heat-stressed	8	0	8
A. tenuis	2021-11-14	2021-11-19	5	ATEN15	Heat-stressed	8	0	8
A. tenuis	2021-11-14	2021-11-19	5	ATEN16	Heat-stressed	8	0	8
A. tenuis	2021-11-14	2021-11-19	5	ATEN17	Heat-stressed	8	0	8
A. tenuis	2021-11-14	2021-11-19	5	ATEN18	Heat-stressed	8	0	8
A. tenuis	2021-11-14	2021-11-19	5	ATEN19	Heat-stressed	7	0	7
A. tenuis	2021-11-14	2021-11-19	5	ATEN20	Heat-stressed	8	0	8
A. tenuis	2021-11-14	2021-11-19	5	ATEN21	Heat-stressed	7	0	7
A. tenuis	2021-11-14	2021-11-19	5	ATEN22	Heat-stressed	8	0	8
A. tenuis	2021-11-14	2021-11-19	5	ATEN23	Heat-stressed	8	0	8
A. tenuis	2021-11-14	2021-11-19	5	ATEN24	Heat-stressed	7	1	6
A. tenuis	2021-11-14	2021-11-19	5	ATEN25	Heat-stressed	8	1	7
A. tenuis	2021-11-14	2021-11-19	5	ATEN26	Heat-stressed	8	0	8
A. tenuis	2021-11-14	2021-11-19	5	ATEN27	Heat-stressed	8	0	8
A. tenuis	2021-11-14	2021-11-19	5	ATEN28	Heat-stressed	8	0	8
A. tenuis	2021-11-14	2021-11-19	5	ATEN29	Heat-stressed	8	0	8
A. tenuis	2021-11-14	2021-11-19	5	ATEN30	Heat-stressed	8	0	8
A. tenuis	2021-11-14	2021-11-20	6	ATEN01	Control	8	0	8
A. tenuis	2021-11-14	2021-11-20	6	ATEN02	Control	8	0	8
A. tenuis	2021-11-14	2021-11-20	6	ATEN03	Control	8	0	8
A. tenuis	2021-11-14	2021-11-20	6	ATEN04	Control	8	0	8
A. tenuis	2021-11-14	2021-11-20	6	ATEN05	Control	8	0	8
A. tenuis	2021-11-14	2021-11-20	6	ATEN06	Control	8	0	8
A. tenuis	2021-11-14	2021-11-20	6	ATEN07	Control	8	1	7
A. tenuis	2021-11-14	2021-11-20	6	ATEN08	Control	8	2	6
A. tenuis	2021-11-14	2021-11-20	6	ATEN09	Control	8	0	8
A. tenuis	2021-11-14	2021-11-20	6	ATEN10	Control	8	0	8
A. tenuis	2021-11-14	2021-11-20	6	ATEN11	Control	8	0	8
A. tenuis	2021-11-14	2021-11-20	6	ATEN12	Control	8	0	8
A. tenuis	2021-11-14	2021-11-20	6	ATEN13	Control	8	0	8
A. tenuis	2021-11-14	2021-11-20	6	ATEN14	Control	8	0	8
A. tenuis	2021-11-14	2021-11-20	6	ATEN15	Control	8	0	8
A. tenuis	2021-11-14	2021-11-20	6	ATEN16	Control	8	0	8
A. tenuis	2021-11-14	2021-11-20	6	ATEN17	Control	8	0	8
A. tenuis	2021-11-14	2021-11-20	6	ATEN18	Control	8	0	8
A. tenuis	2021-11-14	2021-11-20	6	ATEN19	Control	8	0	8
A. tenuis	2021-11-14	2021-11-20	6	ATEN20	Control	8	0	8
A. tenuis	2021-11-14	2021-11-20	6	ATEN21	Control	8	0	8
A. tenuis	2021-11-14	2021-11-20	6	ATEN22	Control	8	0	8
A. tenuis	2021-11-14	2021-11-20	6	ATEN23	Control	8	0	8
A. tenuis	2021-11-14	2021-11-20	6	ATEN24	Control	8	1	7
A. tenuis	2021-11-14	2021-11-20	6	ATEN25	Control	8	2	6
A. tenuis	2021-11-14	2021-11-20	6	ATEN26	Control	8	0	8
A. tenuis	2021-11-14	2021-11-20	6	ATEN27	Control	8	0	8
A. tenuis	2021-11-14	2021-11-20	6	ATEN28	Control	8	0	8
A. tenuis	2021-11-14	2021-11-20	6	ATEN29	Control	8	0	8
A. tenuis	2021-11-14	2021-11-20	6	ATEN30	Control	8	0	8
A. tenuis	2021-11-14	2021-11-20	6	ATEN01	Heat-stressed	8	0	8
A. tenuis	2021-11-14	2021-11-20	6	ATEN02	Heat-stressed	8	0	8
A. tenuis	2021-11-14	2021-11-20	6	ATEN03	Heat-stressed	8	0	8
A. tenuis	2021-11-14	2021-11-20	6	ATEN04	Heat-stressed	8	0	8
A. tenuis	2021-11-14	2021-11-20	6	ATEN05	Heat-stressed	8	0	8
A. tenuis	2021-11-14	2021-11-20	6	ATEN06	Heat-stressed	8	0	8
A. tenuis	2021-11-14	2021-11-20	6	ATEN07	Heat-stressed	8	0	8
A. tenuis	2021-11-14	2021-11-20	6	ATEN08	Heat-stressed	8	1	7
A. tenuis	2021-11-14	2021-11-20	6	ATEN09	Heat-stressed	8	0	8
A. tenuis	2021-11-14	2021-11-20	6	ATEN10	Heat-stressed	8	0	8
A. tenuis	2021-11-14	2021-11-20	6	ATEN11	Heat-stressed	8	0	8
A. tenuis	2021-11-14	2021-11-20	6	ATEN12	Heat-stressed	8	0	8
A. tenuis	2021-11-14	2021-11-20	6	ATEN13	Heat-stressed	8	0	8
A. tenuis	2021-11-14	2021-11-20	6	ATEN14	Heat-stressed	8	0	8
A. tenuis	2021-11-14	2021-11-20	6	ATEN15	Heat-stressed	8	0	8
A. tenuis	2021-11-14	2021-11-20	6	ATEN16	Heat-stressed	8	0	8
A. tenuis	2021-11-14	2021-11-20	6	ATEN17	Heat-stressed	8	0	8
A. tenuis	2021-11-14	2021-11-20	6	ATEN18	Heat-stressed	8	0	8
A. tenuis	2021-11-14	2021-11-20	6	ATEN19	Heat-stressed	7	0	7
A. tenuis	2021-11-14	2021-11-20	6	ATEN20	Heat-stressed	8	0	8
A. tenuis	2021-11-14	2021-11-20	6	ATEN21	Heat-stressed	7	0	7
A. tenuis	2021-11-14	2021-11-20	6	ATEN22	Heat-stressed	8	0	8
A. tenuis	2021-11-14	2021-11-20	6	ATEN23	Heat-stressed	8	0	8
A. tenuis	2021-11-14	2021-11-20	6	ATEN24	Heat-stressed	7	1	6
A. tenuis	2021-11-14	2021-11-20	6	ATEN25	Heat-stressed	8	1	7
A. tenuis	2021-11-14	2021-11-20	6	ATEN26	Heat-stressed	8	0	8
A. tenuis	2021-11-14	2021-11-20	6	ATEN27	Heat-stressed	8	0	8
A. tenuis	2021-11-14	2021-11-20	6	ATEN28	Heat-stressed	8	0	8
A. tenuis	2021-11-14	2021-11-20	6	ATEN29	Heat-stressed	8	0	8
A. tenuis	2021-11-14	2021-11-20	6	ATEN30	Heat-stressed	8	0	8
A. tenuis	2021-11-14	2021-11-21	7	ATEN01	Control	8	0	8
A. tenuis	2021-11-14	2021-11-21	7	ATEN02	Control	8	0	8
A. tenuis	2021-11-14	2021-11-21	7	ATEN03	Control	8	0	8
A. tenuis	2021-11-14	2021-11-21	7	ATEN04	Control	8	0	8
A. tenuis	2021-11-14	2021-11-21	7	ATEN05	Control	8	0	8
A. tenuis	2021-11-14	2021-11-21	7	ATEN06	Control	8	0	8
A. tenuis	2021-11-14	2021-11-21	7	ATEN07	Control	8	1	7
A. tenuis	2021-11-14	2021-11-21	7	ATEN08	Control	8	2	6
A. tenuis	2021-11-14	2021-11-21	7	ATEN09	Control	8	0	8
A. tenuis	2021-11-14	2021-11-21	7	ATEN10	Control	8	0	8
A. tenuis	2021-11-14	2021-11-21	7	ATEN11	Control	8	0	8
A. tenuis	2021-11-14	2021-11-21	7	ATEN12	Control	8	0	8
A. tenuis	2021-11-14	2021-11-21	7	ATEN13	Control	8	0	8
A. tenuis	2021-11-14	2021-11-21	7	ATEN14	Control	8	0	8
A. tenuis	2021-11-14	2021-11-21	7	ATEN15	Control	8	0	8
A. tenuis	2021-11-14	2021-11-21	7	ATEN16	Control	8	0	8
A. tenuis	2021-11-14	2021-11-21	7	ATEN17	Control	8	0	8
A. tenuis	2021-11-14	2021-11-21	7	ATEN18	Control	8	0	8
A. tenuis	2021-11-14	2021-11-21	7	ATEN19	Control	8	0	8
A. tenuis	2021-11-14	2021-11-21	7	ATEN20	Control	8	0	8
A. tenuis	2021-11-14	2021-11-21	7	ATEN21	Control	8	0	8
A. tenuis	2021-11-14	2021-11-21	7	ATEN22	Control	8	0	8
A. tenuis	2021-11-14	2021-11-21	7	ATEN23	Control	8	0	8
A. tenuis	2021-11-14	2021-11-21	7	ATEN24	Control	8	1	7
A. tenuis	2021-11-14	2021-11-21	7	ATEN25	Control	8	2	6
A. tenuis	2021-11-14	2021-11-21	7	ATEN26	Control	8	0	8
A. tenuis	2021-11-14	2021-11-21	7	ATEN27	Control	8	0	8
A. tenuis	2021-11-14	2021-11-21	7	ATEN28	Control	8	0	8
A. tenuis	2021-11-14	2021-11-21	7	ATEN29	Control	8	0	8
A. tenuis	2021-11-14	2021-11-21	7	ATEN30	Control	8	0	8
A. tenuis	2021-11-14	2021-11-21	7	ATEN01	Heat-stressed	8	0	8
A. tenuis	2021-11-14	2021-11-21	7	ATEN02	Heat-stressed	8	0	8
A. tenuis	2021-11-14	2021-11-21	7	ATEN03	Heat-stressed	8	0	8
A. tenuis	2021-11-14	2021-11-21	7	ATEN04	Heat-stressed	8	1	7
A. tenuis	2021-11-14	2021-11-21	7	ATEN05	Heat-stressed	8	0	8
A. tenuis	2021-11-14	2021-11-21	7	ATEN06	Heat-stressed	8	0	8
A. tenuis	2021-11-14	2021-11-21	7	ATEN07	Heat-stressed	8	0	8
A. tenuis	2021-11-14	2021-11-21	7	ATEN08	Heat-stressed	8	1	7
A. tenuis	2021-11-14	2021-11-21	7	ATEN09	Heat-stressed	8	0	8
A. tenuis	2021-11-14	2021-11-21	7	ATEN10	Heat-stressed	8	0	8
A. tenuis	2021-11-14	2021-11-21	7	ATEN11	Heat-stressed	8	0	8
A. tenuis	2021-11-14	2021-11-21	7	ATEN12	Heat-stressed	8	0	8
A. tenuis	2021-11-14	2021-11-21	7	ATEN13	Heat-stressed	8	0	8
A. tenuis	2021-11-14	2021-11-21	7	ATEN14	Heat-stressed	8	0	8
A. tenuis	2021-11-14	2021-11-21	7	ATEN15	Heat-stressed	8	0	8
A. tenuis	2021-11-14	2021-11-21	7	ATEN16	Heat-stressed	8	0	8
A. tenuis	2021-11-14	2021-11-21	7	ATEN17	Heat-stressed	8	1	7
A. tenuis	2021-11-14	2021-11-21	7	ATEN18	Heat-stressed	8	0	8
A. tenuis	2021-11-14	2021-11-21	7	ATEN19	Heat-stressed	7	0	7
A. tenuis	2021-11-14	2021-11-21	7	ATEN20	Heat-stressed	8	0	8
A. tenuis	2021-11-14	2021-11-21	7	ATEN21	Heat-stressed	7	0	7
A. tenuis	2021-11-14	2021-11-21	7	ATEN22	Heat-stressed	8	0	8
A. tenuis	2021-11-14	2021-11-21	7	ATEN23	Heat-stressed	8	0	8
A. tenuis	2021-11-14	2021-11-21	7	ATEN24	Heat-stressed	7	1	6
A. tenuis	2021-11-14	2021-11-21	7	ATEN25	Heat-stressed	8	1	7
A. tenuis	2021-11-14	2021-11-21	7	ATEN26	Heat-stressed	8	1	7
A. tenuis	2021-11-14	2021-11-21	7	ATEN27	Heat-stressed	8	0	8
A. tenuis	2021-11-14	2021-11-21	7	ATEN28	Heat-stressed	8	0	8
A. tenuis	2021-11-14	2021-11-21	7	ATEN29	Heat-stressed	8	0	8
A. tenuis	2021-11-14	2021-11-21	7	ATEN30	Heat-stressed	8	0	8
A. tenuis	2021-11-14	2021-11-22	8	ATEN01	Control	8	0	8
A. tenuis	2021-11-14	2021-11-22	8	ATEN02	Control	8	0	8
A. tenuis	2021-11-14	2021-11-22	8	ATEN03	Control	8	0	8
A. tenuis	2021-11-14	2021-11-22	8	ATEN04	Control	8	0	8
A. tenuis	2021-11-14	2021-11-22	8	ATEN05	Control	8	0	8
A. tenuis	2021-11-14	2021-11-22	8	ATEN06	Control	8	0	8
A. tenuis	2021-11-14	2021-11-22	8	ATEN07	Control	8	1	7
A. tenuis	2021-11-14	2021-11-22	8	ATEN08	Control	8	2	6
A. tenuis	2021-11-14	2021-11-22	8	ATEN09	Control	8	0	8
A. tenuis	2021-11-14	2021-11-22	8	ATEN10	Control	8	0	8
A. tenuis	2021-11-14	2021-11-22	8	ATEN11	Control	8	0	8
A. tenuis	2021-11-14	2021-11-22	8	ATEN12	Control	8	0	8
A. tenuis	2021-11-14	2021-11-22	8	ATEN13	Control	8	0	8
A. tenuis	2021-11-14	2021-11-22	8	ATEN14	Control	8	0	8
A. tenuis	2021-11-14	2021-11-22	8	ATEN15	Control	8	0	8
A. tenuis	2021-11-14	2021-11-22	8	ATEN16	Control	8	0	8
A. tenuis	2021-11-14	2021-11-22	8	ATEN17	Control	8	0	8
A. tenuis	2021-11-14	2021-11-22	8	ATEN18	Control	8	0	8
A. tenuis	2021-11-14	2021-11-22	8	ATEN19	Control	8	0	8
A. tenuis	2021-11-14	2021-11-22	8	ATEN20	Control	8	0	8
A. tenuis	2021-11-14	2021-11-22	8	ATEN21	Control	8	0	8
A. tenuis	2021-11-14	2021-11-22	8	ATEN22	Control	8	0	8
A. tenuis	2021-11-14	2021-11-22	8	ATEN23	Control	8	0	8
A. tenuis	2021-11-14	2021-11-22	8	ATEN24	Control	8	1	7
A. tenuis	2021-11-14	2021-11-22	8	ATEN25	Control	8	2	6
A. tenuis	2021-11-14	2021-11-22	8	ATEN26	Control	8	0	8
A. tenuis	2021-11-14	2021-11-22	8	ATEN27	Control	8	0	8
A. tenuis	2021-11-14	2021-11-22	8	ATEN28	Control	8	0	8
A. tenuis	2021-11-14	2021-11-22	8	ATEN29	Control	8	0	8
A. tenuis	2021-11-14	2021-11-22	8	ATEN30	Control	8	0	8
A. tenuis	2021-11-14	2021-11-22	8	ATEN01	Heat-stressed	8	0	8
A. tenuis	2021-11-14	2021-11-22	8	ATEN02	Heat-stressed	8	0	8
A. tenuis	2021-11-14	2021-11-22	8	ATEN03	Heat-stressed	8	0	8
A. tenuis	2021-11-14	2021-11-22	8	ATEN04	Heat-stressed	8	1	7
A. tenuis	2021-11-14	2021-11-22	8	ATEN05	Heat-stressed	8	0	8
A. tenuis	2021-11-14	2021-11-22	8	ATEN06	Heat-stressed	8	2	6
A. tenuis	2021-11-14	2021-11-22	8	ATEN07	Heat-stressed	8	0	8
A. tenuis	2021-11-14	2021-11-22	8	ATEN08	Heat-stressed	8	1	7
A. tenuis	2021-11-14	2021-11-22	8	ATEN09	Heat-stressed	8	0	8
A. tenuis	2021-11-14	2021-11-22	8	ATEN10	Heat-stressed	8	0	8
A. tenuis	2021-11-14	2021-11-22	8	ATEN11	Heat-stressed	8	0	8
A. tenuis	2021-11-14	2021-11-22	8	ATEN12	Heat-stressed	8	0	8
A. tenuis	2021-11-14	2021-11-22	8	ATEN13	Heat-stressed	8	0	8
A. tenuis	2021-11-14	2021-11-22	8	ATEN14	Heat-stressed	8	0	8
A. tenuis	2021-11-14	2021-11-22	8	ATEN15	Heat-stressed	8	0	8
A. tenuis	2021-11-14	2021-11-22	8	ATEN16	Heat-stressed	8	0	8
A. tenuis	2021-11-14	2021-11-22	8	ATEN17	Heat-stressed	8	1	7
A. tenuis	2021-11-14	2021-11-22	8	ATEN18	Heat-stressed	8	0	8
A. tenuis	2021-11-14	2021-11-22	8	ATEN19	Heat-stressed	7	0	7
A. tenuis	2021-11-14	2021-11-22	8	ATEN20	Heat-stressed	8	0	8
A. tenuis	2021-11-14	2021-11-22	8	ATEN21	Heat-stressed	7	0	7
A. tenuis	2021-11-14	2021-11-22	8	ATEN22	Heat-stressed	8	0	8
A. tenuis	2021-11-14	2021-11-22	8	ATEN23	Heat-stressed	8	3	5
A. tenuis	2021-11-14	2021-11-22	8	ATEN24	Heat-stressed	7	1	6
A. tenuis	2021-11-14	2021-11-22	8	ATEN25	Heat-stressed	8	1	7
A. tenuis	2021-11-14	2021-11-22	8	ATEN26	Heat-stressed	8	1	7
A. tenuis	2021-11-14	2021-11-22	8	ATEN27	Heat-stressed	8	1	7
A. tenuis	2021-11-14	2021-11-22	8	ATEN28	Heat-stressed	8	0	8
A. tenuis	2021-11-14	2021-11-22	8	ATEN29	Heat-stressed	8	0	8
A. tenuis	2021-11-14	2021-11-22	8	ATEN30	Heat-stressed	8	0	8
A. tenuis	2021-11-14	2021-11-23	9	ATEN01	Control	8	0	8
A. tenuis	2021-11-14	2021-11-23	9	ATEN02	Control	8	0	8
A. tenuis	2021-11-14	2021-11-23	9	ATEN03	Control	8	0	8
A. tenuis	2021-11-14	2021-11-23	9	ATEN04	Control	8	0	8
A. tenuis	2021-11-14	2021-11-23	9	ATEN05	Control	8	0	8
A. tenuis	2021-11-14	2021-11-23	9	ATEN06	Control	8	0	8
A. tenuis	2021-11-14	2021-11-23	9	ATEN07	Control	8	1	7
A. tenuis	2021-11-14	2021-11-23	9	ATEN08	Control	8	2	6
A. tenuis	2021-11-14	2021-11-23	9	ATEN09	Control	8	0	8
A. tenuis	2021-11-14	2021-11-23	9	ATEN10	Control	8	0	8
A. tenuis	2021-11-14	2021-11-23	9	ATEN11	Control	8	0	8
A. tenuis	2021-11-14	2021-11-23	9	ATEN12	Control	8	0	8
A. tenuis	2021-11-14	2021-11-23	9	ATEN13	Control	8	0	8
A. tenuis	2021-11-14	2021-11-23	9	ATEN14	Control	8	0	8
A. tenuis	2021-11-14	2021-11-23	9	ATEN15	Control	8	0	8
A. tenuis	2021-11-14	2021-11-23	9	ATEN16	Control	8	0	8
A. tenuis	2021-11-14	2021-11-23	9	ATEN17	Control	8	0	8
A. tenuis	2021-11-14	2021-11-23	9	ATEN18	Control	8	0	8
A. tenuis	2021-11-14	2021-11-23	9	ATEN19	Control	8	0	8
A. tenuis	2021-11-14	2021-11-23	9	ATEN20	Control	8	0	8
A. tenuis	2021-11-14	2021-11-23	9	ATEN21	Control	8	0	8
A. tenuis	2021-11-14	2021-11-23	9	ATEN22	Control	8	0	8
A. tenuis	2021-11-14	2021-11-23	9	ATEN23	Control	8	0	8
A. tenuis	2021-11-14	2021-11-23	9	ATEN24	Control	8	1	7
A. tenuis	2021-11-14	2021-11-23	9	ATEN25	Control	8	2	6
A. tenuis	2021-11-14	2021-11-23	9	ATEN26	Control	8	0	8
A. tenuis	2021-11-14	2021-11-23	9	ATEN27	Control	8	0	8
A. tenuis	2021-11-14	2021-11-23	9	ATEN28	Control	8	0	8
A. tenuis	2021-11-14	2021-11-23	9	ATEN29	Control	8	0	8
A. tenuis	2021-11-14	2021-11-23	9	ATEN30	Control	8	0	8
A. tenuis	2021-11-14	2021-11-23	9	ATEN01	Heat-stressed	8	5	3
A. tenuis	2021-11-14	2021-11-23	9	ATEN02	Heat-stressed	8	0	8
A. tenuis	2021-11-14	2021-11-23	9	ATEN03	Heat-stressed	8	0	8
A. tenuis	2021-11-14	2021-11-23	9	ATEN04	Heat-stressed	8	5	3
A. tenuis	2021-11-14	2021-11-23	9	ATEN05	Heat-stressed	8	0	8
A. tenuis	2021-11-14	2021-11-23	9	ATEN06	Heat-stressed	8	2	6
A. tenuis	2021-11-14	2021-11-23	9	ATEN07	Heat-stressed	8	0	8
A. tenuis	2021-11-14	2021-11-23	9	ATEN08	Heat-stressed	8	1	7
A. tenuis	2021-11-14	2021-11-23	9	ATEN09	Heat-stressed	8	0	8
A. tenuis	2021-11-14	2021-11-23	9	ATEN10	Heat-stressed	8	0	8
A. tenuis	2021-11-14	2021-11-23	9	ATEN11	Heat-stressed	8	0	8
A. tenuis	2021-11-14	2021-11-23	9	ATEN12	Heat-stressed	8	0	8
A. tenuis	2021-11-14	2021-11-23	9	ATEN13	Heat-stressed	8	0	8
A. tenuis	2021-11-14	2021-11-23	9	ATEN14	Heat-stressed	8	0	8
A. tenuis	2021-11-14	2021-11-23	9	ATEN15	Heat-stressed	8	0	8
A. tenuis	2021-11-14	2021-11-23	9	ATEN16	Heat-stressed	8	0	8
A. tenuis	2021-11-14	2021-11-23	9	ATEN17	Heat-stressed	8	1	7
A. tenuis	2021-11-14	2021-11-23	9	ATEN18	Heat-stressed	8	0	8
A. tenuis	2021-11-14	2021-11-23	9	ATEN19	Heat-stressed	7	0	7
A. tenuis	2021-11-14	2021-11-23	9	ATEN20	Heat-stressed	8	0	8
A. tenuis	2021-11-14	2021-11-23	9	ATEN21	Heat-stressed	7	0	7
A. tenuis	2021-11-14	2021-11-23	9	ATEN22	Heat-stressed	8	0	8
A. tenuis	2021-11-14	2021-11-23	9	ATEN23	Heat-stressed	8	6	2
A. tenuis	2021-11-14	2021-11-23	9	ATEN24	Heat-stressed	7	1	6
A. tenuis	2021-11-14	2021-11-23	9	ATEN25	Heat-stressed	8	1	7
A. tenuis	2021-11-14	2021-11-23	9	ATEN26	Heat-stressed	8	1	7
A. tenuis	2021-11-14	2021-11-23	9	ATEN27	Heat-stressed	8	1	7
A. tenuis	2021-11-14	2021-11-23	9	ATEN28	Heat-stressed	8	0	8
A. tenuis	2021-11-14	2021-11-23	9	ATEN29	Heat-stressed	8	0	8
A. tenuis	2021-11-14	2021-11-23	9	ATEN30	Heat-stressed	8	0	8
A. tenuis	2021-11-14	2021-11-24	10	ATEN01	Control	8	0	8
A. tenuis	2021-11-14	2021-11-24	10	ATEN02	Control	8	0	8
A. tenuis	2021-11-14	2021-11-24	10	ATEN03	Control	8	0	8
A. tenuis	2021-11-14	2021-11-24	10	ATEN04	Control	8	0	8
A. tenuis	2021-11-14	2021-11-24	10	ATEN05	Control	8	0	8
A. tenuis	2021-11-14	2021-11-24	10	ATEN06	Control	8	0	8
A. tenuis	2021-11-14	2021-11-24	10	ATEN07	Control	8	1	7
A. tenuis	2021-11-14	2021-11-24	10	ATEN08	Control	8	1	7
A. tenuis	2021-11-14	2021-11-24	10	ATEN09	Control	8	2	6
A. tenuis	2021-11-14	2021-11-24	10	ATEN10	Control	8	0	8
A. tenuis	2021-11-14	2021-11-24	10	ATEN11	Control	8	0	8
A. tenuis	2021-11-14	2021-11-24	10	ATEN12	Control	8	0	8
A. tenuis	2021-11-14	2021-11-24	10	ATEN13	Control	8	0	8
A. tenuis	2021-11-14	2021-11-24	10	ATEN14	Control	8	0	8
A. tenuis	2021-11-14	2021-11-24	10	ATEN15	Control	8	0	8
A. tenuis	2021-11-14	2021-11-24	10	ATEN16	Control	8	0	8
A. tenuis	2021-11-14	2021-11-24	10	ATEN17	Control	8	0	8
A. tenuis	2021-11-14	2021-11-24	10	ATEN18	Control	8	0	8
A. tenuis	2021-11-14	2021-11-24	10	ATEN19	Control	8	0	8
A. tenuis	2021-11-14	2021-11-24	10	ATEN20	Control	8	0	8
A. tenuis	2021-11-14	2021-11-24	10	ATEN21	Control	8	0	8
A. tenuis	2021-11-14	2021-11-24	10	ATEN22	Control	8	0	8
A. tenuis	2021-11-14	2021-11-24	10	ATEN23	Control	8	0	8
A. tenuis	2021-11-14	2021-11-24	10	ATEN24	Control	8	1	7
A. tenuis	2021-11-14	2021-11-24	10	ATEN25	Control	8	2	6
A. tenuis	2021-11-14	2021-11-24	10	ATEN26	Control	8	0	8
A. tenuis	2021-11-14	2021-11-24	10	ATEN27	Control	8	0	8
A. tenuis	2021-11-14	2021-11-24	10	ATEN28	Control	8	0	8
A. tenuis	2021-11-14	2021-11-24	10	ATEN29	Control	8	0	8
A. tenuis	2021-11-14	2021-11-24	10	ATEN30	Control	8	0	8
A. tenuis	2021-11-14	2021-11-24	10	ATEN01	Heat-stressed	8	8	0
A. tenuis	2021-11-14	2021-11-24	10	ATEN02	Heat-stressed	8	3	5
A. tenuis	2021-11-14	2021-11-24	10	ATEN03	Heat-stressed	8	0	8
A. tenuis	2021-11-14	2021-11-24	10	ATEN04	Heat-stressed	8	8	0
A. tenuis	2021-11-14	2021-11-24	10	ATEN05	Heat-stressed	8	0	8
A. tenuis	2021-11-14	2021-11-24	10	ATEN06	Heat-stressed	8	4	4
A. tenuis	2021-11-14	2021-11-24	10	ATEN07	Heat-stressed	8	0	8
A. tenuis	2021-11-14	2021-11-24	10	ATEN08	Heat-stressed	8	1	7
A. tenuis	2021-11-14	2021-11-24	10	ATEN09	Heat-stressed	8	0	8
A. tenuis	2021-11-14	2021-11-24	10	ATEN10	Heat-stressed	8	1	7
A. tenuis	2021-11-14	2021-11-24	10	ATEN11	Heat-stressed	8	3	5
A. tenuis	2021-11-14	2021-11-24	10	ATEN12	Heat-stressed	8	4	4
A. tenuis	2021-11-14	2021-11-24	10	ATEN13	Heat-stressed	8	0	8
A. tenuis	2021-11-14	2021-11-24	10	ATEN14	Heat-stressed	8	0	8
A. tenuis	2021-11-14	2021-11-24	10	ATEN15	Heat-stressed	8	7	1
A. tenuis	2021-11-14	2021-11-24	10	ATEN16	Heat-stressed	8	2	6
A. tenuis	2021-11-14	2021-11-24	10	ATEN17	Heat-stressed	8	1	7
A. tenuis	2021-11-14	2021-11-24	10	ATEN18	Heat-stressed	8	0	8
A. tenuis	2021-11-14	2021-11-24	10	ATEN19	Heat-stressed	7	0	7
A. tenuis	2021-11-14	2021-11-24	10	ATEN20	Heat-stressed	8	0	8
A. tenuis	2021-11-14	2021-11-24	10	ATEN21	Heat-stressed	7	0	7
A. tenuis	2021-11-14	2021-11-24	10	ATEN22	Heat-stressed	8	0	8
A. tenuis	2021-11-14	2021-11-24	10	ATEN23	Heat-stressed	8	8	0
A. tenuis	2021-11-14	2021-11-24	10	ATEN24	Heat-stressed	7	2	5
A. tenuis	2021-11-14	2021-11-24	10	ATEN25	Heat-stressed	8	1	7
A. tenuis	2021-11-14	2021-11-24	10	ATEN26	Heat-stressed	8	1	7
A. tenuis	2021-11-14	2021-11-24	10	ATEN27	Heat-stressed	8	3	5
A. tenuis	2021-11-14	2021-11-24	10	ATEN28	Heat-stressed	8	0	8
A. tenuis	2021-11-14	2021-11-24	10	ATEN29	Heat-stressed	8	0	8
A. tenuis	2021-11-14	2021-11-24	10	ATEN30	Heat-stressed	8	0	8
A. digitifera	2021-10-28	2021-10-28	0	ADIG01	Control	8	0	8
A. digitifera	2021-10-28	2021-10-28	0	ADIG02	Control	8	0	8
A. digitifera	2021-10-28	2021-10-28	0	ADIG03	Control	8	0	8
A. digitifera	2021-10-28	2021-10-28	0	ADIG04	Control	8	0	8
A. digitifera	2021-10-28	2021-10-28	0	ADIG05	Control	8	0	8
A. digitifera	2021-10-28	2021-10-28	0	ADIG06	Control	8	0	8
A. digitifera	2021-10-28	2021-10-28	0	ADIG07	Control	7	0	7
A. digitifera	2021-10-28	2021-10-28	0	ADIG08	Control	8	0	8
A. digitifera	2021-10-28	2021-10-28	0	ADIG09	Control	7	0	7
A. digitifera	2021-10-28	2021-10-28	0	ADIG10	Control	8	0	8
A. digitifera	2021-10-28	2021-10-28	0	ADIG11	Control	8	0	8
A. digitifera	2021-10-28	2021-10-28	0	ADIG12	Control	8	0	8
A. digitifera	2021-10-28	2021-10-28	0	ADIG13	Control	8	0	8
A. digitifera	2021-10-28	2021-10-28	0	ADIG14	Control	8	0	8
A. digitifera	2021-10-28	2021-10-28	0	ADIG15	Control	8	0	8
A. digitifera	2021-10-28	2021-10-28	0	ADIG16	Control	8	0	8
A. digitifera	2021-10-28	2021-10-28	0	ADIG17	Control	8	0	8
A. digitifera	2021-10-28	2021-10-28	0	ADIG18	Control	8	0	8
A. digitifera	2021-10-28	2021-10-28	0	ADIG19	Control	8	0	8
A. digitifera	2021-10-28	2021-10-28	0	ADIG20	Control	8	0	8
A. digitifera	2021-10-28	2021-10-28	0	ADIG21	Control	8	0	8
A. digitifera	2021-10-28	2021-10-28	0	ADIG22	Control	8	0	8
A. digitifera	2021-10-28	2021-10-28	0	ADIG23	Control	8	0	8
A. digitifera	2021-10-28	2021-10-28	0	ADIG24	Control	8	0	8
A. digitifera	2021-10-28	2021-10-28	0	ADIG25	Control	8	0	8
A. digitifera	2021-10-28	2021-10-28	0	ADIG26	Control	8	0	8
A. digitifera	2021-10-28	2021-10-28	0	ADIG27	Control	8	0	8
A. digitifera	2021-10-28	2021-10-28	0	ADIG28	Control	8	0	8
A. digitifera	2021-10-28	2021-10-28	0	ADIG29	Control	8	0	8
A. digitifera	2021-10-28	2021-10-28	0	ADIG30	Control	8	0	8
A. digitifera	2021-10-28	2021-10-28	0	ADIG31	Control	8	0	8
A. digitifera	2021-10-28	2021-10-28	0	ADIG32	Control	8	0	8
A. digitifera	2021-10-28	2021-10-28	0	ADIG33	Control	8	0	8
A. digitifera	2021-10-28	2021-10-28	0	ADIG34	Control	8	0	8
A. digitifera	2021-10-28	2021-10-28	0	ADIG35	Control	8	0	8
A. digitifera	2021-10-28	2021-10-28	0	ADIG36	Control	8	0	8
A. digitifera	2021-10-28	2021-10-28	0	ADIG37	Control	8	0	8
A. digitifera	2021-10-28	2021-10-28	0	ADIG38	Control	8	0	8
A. digitifera	2021-10-28	2021-10-28	0	ADIG39	Control	8	0	8
A. digitifera	2021-10-28	2021-10-28	0	ADIG40	Control	8	0	8
A. digitifera	2021-10-28	2021-10-28	0	ADIG01	Heat-stressed	8	0	8
A. digitifera	2021-10-28	2021-10-28	0	ADIG02	Heat-stressed	8	0	8
A. digitifera	2021-10-28	2021-10-28	0	ADIG03	Heat-stressed	8	0	8
A. digitifera	2021-10-28	2021-10-28	0	ADIG04	Heat-stressed	7	0	7
A. digitifera	2021-10-28	2021-10-28	0	ADIG05	Heat-stressed	8	0	8
A. digitifera	2021-10-28	2021-10-28	0	ADIG06	Heat-stressed	8	0	8
A. digitifera	2021-10-28	2021-10-28	0	ADIG07	Heat-stressed	7	0	7
A. digitifera	2021-10-28	2021-10-28	0	ADIG08	Heat-stressed	8	0	8
A. digitifera	2021-10-28	2021-10-28	0	ADIG09	Heat-stressed	8	0	8
A. digitifera	2021-10-28	2021-10-28	0	ADIG10	Heat-stressed	8	0	8
A. digitifera	2021-10-28	2021-10-28	0	ADIG11	Heat-stressed	8	0	8
A. digitifera	2021-10-28	2021-10-28	0	ADIG12	Heat-stressed	8	0	8
A. digitifera	2021-10-28	2021-10-28	0	ADIG13	Heat-stressed	8	0	8
A. digitifera	2021-10-28	2021-10-28	0	ADIG14	Heat-stressed	8	0	8
A. digitifera	2021-10-28	2021-10-28	0	ADIG15	Heat-stressed	8	0	8
A. digitifera	2021-10-28	2021-10-28	0	ADIG16	Heat-stressed	8	0	8
A. digitifera	2021-10-28	2021-10-28	0	ADIG17	Heat-stressed	8	0	8
A. digitifera	2021-10-28	2021-10-28	0	ADIG18	Heat-stressed	8	0	8
A. digitifera	2021-10-28	2021-10-28	0	ADIG19	Heat-stressed	8	0	8
A. digitifera	2021-10-28	2021-10-28	0	ADIG20	Heat-stressed	8	0	8
A. digitifera	2021-10-28	2021-10-28	0	ADIG21	Heat-stressed	8	0	8
A. digitifera	2021-10-28	2021-10-28	0	ADIG22	Heat-stressed	8	0	8
A. digitifera	2021-10-28	2021-10-28	0	ADIG23	Heat-stressed	8	0	8
A. digitifera	2021-10-28	2021-10-28	0	ADIG24	Heat-stressed	8	0	8
A. digitifera	2021-10-28	2021-10-28	0	ADIG25	Heat-stressed	8	0	8
A. digitifera	2021-10-28	2021-10-28	0	ADIG26	Heat-stressed	8	0	8
A. digitifera	2021-10-28	2021-10-28	0	ADIG27	Heat-stressed	8	0	8
A. digitifera	2021-10-28	2021-10-28	0	ADIG28	Heat-stressed	8	0	8
A. digitifera	2021-10-28	2021-10-28	0	ADIG29	Heat-stressed	8	0	8
A. digitifera	2021-10-28	2021-10-28	0	ADIG30	Heat-stressed	8	0	8
A. digitifera	2021-10-28	2021-10-28	0	ADIG31	Heat-stressed	8	0	8
A. digitifera	2021-10-28	2021-10-28	0	ADIG32	Heat-stressed	8	0	8
A. digitifera	2021-10-28	2021-10-28	0	ADIG33	Heat-stressed	8	0	8
A. digitifera	2021-10-28	2021-10-28	0	ADIG34	Heat-stressed	8	0	8
A. digitifera	2021-10-28	2021-10-28	0	ADIG35	Heat-stressed	8	0	8
A. digitifera	2021-10-28	2021-10-28	0	ADIG36	Heat-stressed	8	0	8
A. digitifera	2021-10-28	2021-10-28	0	ADIG37	Heat-stressed	8	0	8
A. digitifera	2021-10-28	2021-10-28	0	ADIG38	Heat-stressed	8	0	8
A. digitifera	2021-10-28	2021-10-28	0	ADIG39	Heat-stressed	8	0	8
A. digitifera	2021-10-28	2021-10-28	0	ADIG40	Heat-stressed	8	0	8
A. digitifera	2021-10-28	2021-10-29	1	ADIG01	Control	8	0	8
A. digitifera	2021-10-28	2021-10-29	1	ADIG02	Control	8	0	8
A. digitifera	2021-10-28	2021-10-29	1	ADIG03	Control	8	0	8
A. digitifera	2021-10-28	2021-10-29	1	ADIG04	Control	8	0	8
A. digitifera	2021-10-28	2021-10-29	1	ADIG05	Control	8	0	8
A. digitifera	2021-10-28	2021-10-29	1	ADIG06	Control	8	0	8
A. digitifera	2021-10-28	2021-10-29	1	ADIG07	Control	7	0	7
A. digitifera	2021-10-28	2021-10-29	1	ADIG08	Control	8	0	8
A. digitifera	2021-10-28	2021-10-29	1	ADIG09	Control	7	0	7
A. digitifera	2021-10-28	2021-10-29	1	ADIG10	Control	8	0	8
A. digitifera	2021-10-28	2021-10-29	1	ADIG11	Control	8	0	8
A. digitifera	2021-10-28	2021-10-29	1	ADIG12	Control	8	0	8
A. digitifera	2021-10-28	2021-10-29	1	ADIG13	Control	8	0	8
A. digitifera	2021-10-28	2021-10-29	1	ADIG14	Control	8	0	8
A. digitifera	2021-10-28	2021-10-29	1	ADIG15	Control	8	0	8
A. digitifera	2021-10-28	2021-10-29	1	ADIG16	Control	8	0	8
A. digitifera	2021-10-28	2021-10-29	1	ADIG17	Control	8	0	8
A. digitifera	2021-10-28	2021-10-29	1	ADIG18	Control	8	0	8
A. digitifera	2021-10-28	2021-10-29	1	ADIG19	Control	8	0	8
A. digitifera	2021-10-28	2021-10-29	1	ADIG20	Control	8	0	8
A. digitifera	2021-10-28	2021-10-29	1	ADIG21	Control	8	0	8
A. digitifera	2021-10-28	2021-10-29	1	ADIG22	Control	8	0	8
A. digitifera	2021-10-28	2021-10-29	1	ADIG23	Control	8	0	8
A. digitifera	2021-10-28	2021-10-29	1	ADIG24	Control	8	0	8
A. digitifera	2021-10-28	2021-10-29	1	ADIG25	Control	8	0	8
A. digitifera	2021-10-28	2021-10-29	1	ADIG26	Control	8	0	8
A. digitifera	2021-10-28	2021-10-29	1	ADIG27	Control	8	0	8
A. digitifera	2021-10-28	2021-10-29	1	ADIG28	Control	8	0	8
A. digitifera	2021-10-28	2021-10-29	1	ADIG29	Control	8	0	8
A. digitifera	2021-10-28	2021-10-29	1	ADIG30	Control	8	0	8
A. digitifera	2021-10-28	2021-10-29	1	ADIG31	Control	8	0	8
A. digitifera	2021-10-28	2021-10-29	1	ADIG32	Control	8	0	8
A. digitifera	2021-10-28	2021-10-29	1	ADIG33	Control	8	0	8
A. digitifera	2021-10-28	2021-10-29	1	ADIG34	Control	8	0	8
A. digitifera	2021-10-28	2021-10-29	1	ADIG35	Control	8	0	8
A. digitifera	2021-10-28	2021-10-29	1	ADIG36	Control	8	0	8
A. digitifera	2021-10-28	2021-10-29	1	ADIG37	Control	8	0	8
A. digitifera	2021-10-28	2021-10-29	1	ADIG38	Control	8	0	8
A. digitifera	2021-10-28	2021-10-29	1	ADIG39	Control	8	0	8
A. digitifera	2021-10-28	2021-10-29	1	ADIG40	Control	8	0	8
A. digitifera	2021-10-28	2021-10-29	1	ADIG01	Heat-stressed	8	0	8
A. digitifera	2021-10-28	2021-10-29	1	ADIG02	Heat-stressed	8	0	8
A. digitifera	2021-10-28	2021-10-29	1	ADIG03	Heat-stressed	8	0	8
A. digitifera	2021-10-28	2021-10-29	1	ADIG04	Heat-stressed	7	0	7
A. digitifera	2021-10-28	2021-10-29	1	ADIG05	Heat-stressed	8	0	8
A. digitifera	2021-10-28	2021-10-29	1	ADIG06	Heat-stressed	8	0	8
A. digitifera	2021-10-28	2021-10-29	1	ADIG07	Heat-stressed	7	0	7
A. digitifera	2021-10-28	2021-10-29	1	ADIG08	Heat-stressed	8	0	8
A. digitifera	2021-10-28	2021-10-29	1	ADIG09	Heat-stressed	8	0	8
A. digitifera	2021-10-28	2021-10-29	1	ADIG10	Heat-stressed	8	0	8
A. digitifera	2021-10-28	2021-10-29	1	ADIG11	Heat-stressed	8	0	8
A. digitifera	2021-10-28	2021-10-29	1	ADIG12	Heat-stressed	8	0	8
A. digitifera	2021-10-28	2021-10-29	1	ADIG13	Heat-stressed	8	0	8
A. digitifera	2021-10-28	2021-10-29	1	ADIG14	Heat-stressed	8	0	8
A. digitifera	2021-10-28	2021-10-29	1	ADIG15	Heat-stressed	8	0	8
A. digitifera	2021-10-28	2021-10-29	1	ADIG16	Heat-stressed	8	0	8
A. digitifera	2021-10-28	2021-10-29	1	ADIG17	Heat-stressed	8	0	8
A. digitifera	2021-10-28	2021-10-29	1	ADIG18	Heat-stressed	8	0	8
A. digitifera	2021-10-28	2021-10-29	1	ADIG19	Heat-stressed	8	0	8
A. digitifera	2021-10-28	2021-10-29	1	ADIG20	Heat-stressed	8	0	8
A. digitifera	2021-10-28	2021-10-29	1	ADIG21	Heat-stressed	8	0	8
A. digitifera	2021-10-28	2021-10-29	1	ADIG22	Heat-stressed	8	0	8
A. digitifera	2021-10-28	2021-10-29	1	ADIG23	Heat-stressed	8	0	8
A. digitifera	2021-10-28	2021-10-29	1	ADIG24	Heat-stressed	8	0	8
A. digitifera	2021-10-28	2021-10-29	1	ADIG25	Heat-stressed	8	0	8
A. digitifera	2021-10-28	2021-10-29	1	ADIG26	Heat-stressed	8	0	8
A. digitifera	2021-10-28	2021-10-29	1	ADIG27	Heat-stressed	8	0	8
A. digitifera	2021-10-28	2021-10-29	1	ADIG28	Heat-stressed	8	0	8
A. digitifera	2021-10-28	2021-10-29	1	ADIG29	Heat-stressed	8	0	8
A. digitifera	2021-10-28	2021-10-29	1	ADIG30	Heat-stressed	8	0	8
A. digitifera	2021-10-28	2021-10-29	1	ADIG31	Heat-stressed	8	0	8
A. digitifera	2021-10-28	2021-10-29	1	ADIG32	Heat-stressed	8	0	8
A. digitifera	2021-10-28	2021-10-29	1	ADIG33	Heat-stressed	8	0	8
A. digitifera	2021-10-28	2021-10-29	1	ADIG34	Heat-stressed	8	0	8
A. digitifera	2021-10-28	2021-10-29	1	ADIG35	Heat-stressed	8	0	8
A. digitifera	2021-10-28	2021-10-29	1	ADIG36	Heat-stressed	8	0	8
A. digitifera	2021-10-28	2021-10-29	1	ADIG37	Heat-stressed	8	0	8
A. digitifera	2021-10-28	2021-10-29	1	ADIG38	Heat-stressed	8	0	8
A. digitifera	2021-10-28	2021-10-29	1	ADIG39	Heat-stressed	8	0	8
A. digitifera	2021-10-28	2021-10-29	1	ADIG40	Heat-stressed	8	0	8
A. digitifera	2021-10-28	2021-10-30	2	ADIG01	Control	8	0	8
A. digitifera	2021-10-28	2021-10-30	2	ADIG02	Control	8	0	8
A. digitifera	2021-10-28	2021-10-30	2	ADIG03	Control	8	0	8
A. digitifera	2021-10-28	2021-10-30	2	ADIG04	Control	8	0	8
A. digitifera	2021-10-28	2021-10-30	2	ADIG05	Control	8	0	8
A. digitifera	2021-10-28	2021-10-30	2	ADIG06	Control	8	0	8
A. digitifera	2021-10-28	2021-10-30	2	ADIG07	Control	7	0	7
A. digitifera	2021-10-28	2021-10-30	2	ADIG08	Control	8	0	8
A. digitifera	2021-10-28	2021-10-30	2	ADIG09	Control	7	0	7
A. digitifera	2021-10-28	2021-10-30	2	ADIG10	Control	8	0	8
A. digitifera	2021-10-28	2021-10-30	2	ADIG11	Control	8	0	8
A. digitifera	2021-10-28	2021-10-30	2	ADIG12	Control	8	0	8
A. digitifera	2021-10-28	2021-10-30	2	ADIG13	Control	8	0	8
A. digitifera	2021-10-28	2021-10-30	2	ADIG14	Control	8	0	8
A. digitifera	2021-10-28	2021-10-30	2	ADIG15	Control	8	0	8
A. digitifera	2021-10-28	2021-10-30	2	ADIG16	Control	8	0	8
A. digitifera	2021-10-28	2021-10-30	2	ADIG17	Control	8	0	8
A. digitifera	2021-10-28	2021-10-30	2	ADIG18	Control	8	0	8
A. digitifera	2021-10-28	2021-10-30	2	ADIG19	Control	8	0	8
A. digitifera	2021-10-28	2021-10-30	2	ADIG20	Control	8	0	8
A. digitifera	2021-10-28	2021-10-30	2	ADIG21	Control	8	0	8
A. digitifera	2021-10-28	2021-10-30	2	ADIG22	Control	8	0	8
A. digitifera	2021-10-28	2021-10-30	2	ADIG23	Control	8	0	8
A. digitifera	2021-10-28	2021-10-30	2	ADIG24	Control	8	0	8
A. digitifera	2021-10-28	2021-10-30	2	ADIG25	Control	8	0	8
A. digitifera	2021-10-28	2021-10-30	2	ADIG26	Control	8	0	8
A. digitifera	2021-10-28	2021-10-30	2	ADIG27	Control	8	0	8
A. digitifera	2021-10-28	2021-10-30	2	ADIG28	Control	8	0	8
A. digitifera	2021-10-28	2021-10-30	2	ADIG29	Control	8	0	8
A. digitifera	2021-10-28	2021-10-30	2	ADIG30	Control	8	0	8
A. digitifera	2021-10-28	2021-10-30	2	ADIG31	Control	8	0	8
A. digitifera	2021-10-28	2021-10-30	2	ADIG32	Control	8	0	8
A. digitifera	2021-10-28	2021-10-30	2	ADIG33	Control	8	0	8
A. digitifera	2021-10-28	2021-10-30	2	ADIG34	Control	8	0	8
A. digitifera	2021-10-28	2021-10-30	2	ADIG35	Control	8	0	8
A. digitifera	2021-10-28	2021-10-30	2	ADIG36	Control	8	0	8
A. digitifera	2021-10-28	2021-10-30	2	ADIG37	Control	8	0	8
A. digitifera	2021-10-28	2021-10-30	2	ADIG38	Control	8	0	8
A. digitifera	2021-10-28	2021-10-30	2	ADIG39	Control	8	0	8
A. digitifera	2021-10-28	2021-10-30	2	ADIG40	Control	8	0	8
A. digitifera	2021-10-28	2021-10-30	2	ADIG01	Heat-stressed	8	0	8
A. digitifera	2021-10-28	2021-10-30	2	ADIG02	Heat-stressed	8	0	8
A. digitifera	2021-10-28	2021-10-30	2	ADIG03	Heat-stressed	8	0	8
A. digitifera	2021-10-28	2021-10-30	2	ADIG04	Heat-stressed	7	0	7
A. digitifera	2021-10-28	2021-10-30	2	ADIG05	Heat-stressed	8	0	8
A. digitifera	2021-10-28	2021-10-30	2	ADIG06	Heat-stressed	8	0	8
A. digitifera	2021-10-28	2021-10-30	2	ADIG07	Heat-stressed	7	0	7
A. digitifera	2021-10-28	2021-10-30	2	ADIG08	Heat-stressed	8	0	8
A. digitifera	2021-10-28	2021-10-30	2	ADIG09	Heat-stressed	8	0	8
A. digitifera	2021-10-28	2021-10-30	2	ADIG10	Heat-stressed	8	0	8
A. digitifera	2021-10-28	2021-10-30	2	ADIG11	Heat-stressed	8	0	8
A. digitifera	2021-10-28	2021-10-30	2	ADIG12	Heat-stressed	8	0	8
A. digitifera	2021-10-28	2021-10-30	2	ADIG13	Heat-stressed	8	0	8
A. digitifera	2021-10-28	2021-10-30	2	ADIG14	Heat-stressed	8	0	8
A. digitifera	2021-10-28	2021-10-30	2	ADIG15	Heat-stressed	8	0	8
A. digitifera	2021-10-28	2021-10-30	2	ADIG16	Heat-stressed	8	0	8
A. digitifera	2021-10-28	2021-10-30	2	ADIG17	Heat-stressed	8	0	8
A. digitifera	2021-10-28	2021-10-30	2	ADIG18	Heat-stressed	8	0	8
A. digitifera	2021-10-28	2021-10-30	2	ADIG19	Heat-stressed	8	0	8
A. digitifera	2021-10-28	2021-10-30	2	ADIG20	Heat-stressed	8	0	8
A. digitifera	2021-10-28	2021-10-30	2	ADIG21	Heat-stressed	8	0	8
A. digitifera	2021-10-28	2021-10-30	2	ADIG22	Heat-stressed	8	0	8
A. digitifera	2021-10-28	2021-10-30	2	ADIG23	Heat-stressed	8	0	8
A. digitifera	2021-10-28	2021-10-30	2	ADIG24	Heat-stressed	8	0	8
A. digitifera	2021-10-28	2021-10-30	2	ADIG25	Heat-stressed	8	0	8
A. digitifera	2021-10-28	2021-10-30	2	ADIG26	Heat-stressed	8	0	8
A. digitifera	2021-10-28	2021-10-30	2	ADIG27	Heat-stressed	8	0	8
A. digitifera	2021-10-28	2021-10-30	2	ADIG28	Heat-stressed	8	0	8
A. digitifera	2021-10-28	2021-10-30	2	ADIG29	Heat-stressed	8	0	8
A. digitifera	2021-10-28	2021-10-30	2	ADIG30	Heat-stressed	8	0	8
A. digitifera	2021-10-28	2021-10-30	2	ADIG31	Heat-stressed	8	0	8
A. digitifera	2021-10-28	2021-10-30	2	ADIG32	Heat-stressed	8	0	8
A. digitifera	2021-10-28	2021-10-30	2	ADIG33	Heat-stressed	8	0	8
A. digitifera	2021-10-28	2021-10-30	2	ADIG34	Heat-stressed	8	0	8
A. digitifera	2021-10-28	2021-10-30	2	ADIG35	Heat-stressed	8	0	8
A. digitifera	2021-10-28	2021-10-30	2	ADIG36	Heat-stressed	8	0	8
A. digitifera	2021-10-28	2021-10-30	2	ADIG37	Heat-stressed	8	0	8
A. digitifera	2021-10-28	2021-10-30	2	ADIG38	Heat-stressed	8	0	8
A. digitifera	2021-10-28	2021-10-30	2	ADIG39	Heat-stressed	8	0	8
A. digitifera	2021-10-28	2021-10-30	2	ADIG40	Heat-stressed	8	0	8
A. digitifera	2021-10-28	2021-10-31	3	ADIG01	Control	8	0	8
A. digitifera	2021-10-28	2021-10-31	3	ADIG02	Control	8	0	8
A. digitifera	2021-10-28	2021-10-31	3	ADIG03	Control	8	0	8
A. digitifera	2021-10-28	2021-10-31	3	ADIG04	Control	8	0	8
A. digitifera	2021-10-28	2021-10-31	3	ADIG05	Control	8	0	8
A. digitifera	2021-10-28	2021-10-31	3	ADIG06	Control	8	0	8
A. digitifera	2021-10-28	2021-10-31	3	ADIG07	Control	7	0	7
A. digitifera	2021-10-28	2021-10-31	3	ADIG08	Control	8	0	8
A. digitifera	2021-10-28	2021-10-31	3	ADIG09	Control	7	0	7
A. digitifera	2021-10-28	2021-10-31	3	ADIG10	Control	8	0	8
A. digitifera	2021-10-28	2021-10-31	3	ADIG11	Control	8	0	8
A. digitifera	2021-10-28	2021-10-31	3	ADIG12	Control	8	0	8
A. digitifera	2021-10-28	2021-10-31	3	ADIG13	Control	8	0	8
A. digitifera	2021-10-28	2021-10-31	3	ADIG14	Control	8	0	8
A. digitifera	2021-10-28	2021-10-31	3	ADIG15	Control	8	0	8
A. digitifera	2021-10-28	2021-10-31	3	ADIG16	Control	8	0	8
A. digitifera	2021-10-28	2021-10-31	3	ADIG17	Control	8	0	8
A. digitifera	2021-10-28	2021-10-31	3	ADIG18	Control	8	0	8
A. digitifera	2021-10-28	2021-10-31	3	ADIG19	Control	8	0	8
A. digitifera	2021-10-28	2021-10-31	3	ADIG20	Control	8	0	8
A. digitifera	2021-10-28	2021-10-31	3	ADIG21	Control	8	0	8
A. digitifera	2021-10-28	2021-10-31	3	ADIG22	Control	8	0	8
A. digitifera	2021-10-28	2021-10-31	3	ADIG23	Control	8	0	8
A. digitifera	2021-10-28	2021-10-31	3	ADIG24	Control	8	0	8
A. digitifera	2021-10-28	2021-10-31	3	ADIG25	Control	8	0	8
A. digitifera	2021-10-28	2021-10-31	3	ADIG26	Control	8	0	8
A. digitifera	2021-10-28	2021-10-31	3	ADIG27	Control	8	0	8
A. digitifera	2021-10-28	2021-10-31	3	ADIG28	Control	8	0	8
A. digitifera	2021-10-28	2021-10-31	3	ADIG29	Control	8	0	8
A. digitifera	2021-10-28	2021-10-31	3	ADIG30	Control	8	0	8
A. digitifera	2021-10-28	2021-10-31	3	ADIG31	Control	8	0	8
A. digitifera	2021-10-28	2021-10-31	3	ADIG32	Control	8	0	8
A. digitifera	2021-10-28	2021-10-31	3	ADIG33	Control	8	0	8
A. digitifera	2021-10-28	2021-10-31	3	ADIG34	Control	8	0	8
A. digitifera	2021-10-28	2021-10-31	3	ADIG35	Control	8	0	8
A. digitifera	2021-10-28	2021-10-31	3	ADIG36	Control	8	0	8
A. digitifera	2021-10-28	2021-10-31	3	ADIG37	Control	8	0	8
A. digitifera	2021-10-28	2021-10-31	3	ADIG38	Control	8	0	8
A. digitifera	2021-10-28	2021-10-31	3	ADIG39	Control	8	0	8
A. digitifera	2021-10-28	2021-10-31	3	ADIG40	Control	8	0	8
A. digitifera	2021-10-28	2021-10-31	3	ADIG01	Heat-stressed	8	0	8
A. digitifera	2021-10-28	2021-10-31	3	ADIG02	Heat-stressed	8	0	8
A. digitifera	2021-10-28	2021-10-31	3	ADIG03	Heat-stressed	8	0	8
A. digitifera	2021-10-28	2021-10-31	3	ADIG04	Heat-stressed	7	0	7
A. digitifera	2021-10-28	2021-10-31	3	ADIG05	Heat-stressed	8	0	8
A. digitifera	2021-10-28	2021-10-31	3	ADIG06	Heat-stressed	8	0	8
A. digitifera	2021-10-28	2021-10-31	3	ADIG07	Heat-stressed	7	0	7
A. digitifera	2021-10-28	2021-10-31	3	ADIG08	Heat-stressed	8	0	8
A. digitifera	2021-10-28	2021-10-31	3	ADIG09	Heat-stressed	8	0	8
A. digitifera	2021-10-28	2021-10-31	3	ADIG10	Heat-stressed	8	0	8
A. digitifera	2021-10-28	2021-10-31	3	ADIG11	Heat-stressed	8	0	8
A. digitifera	2021-10-28	2021-10-31	3	ADIG12	Heat-stressed	8	0	8
A. digitifera	2021-10-28	2021-10-31	3	ADIG13	Heat-stressed	8	0	8
A. digitifera	2021-10-28	2021-10-31	3	ADIG14	Heat-stressed	8	0	8
A. digitifera	2021-10-28	2021-10-31	3	ADIG15	Heat-stressed	8	0	8
A. digitifera	2021-10-28	2021-10-31	3	ADIG16	Heat-stressed	8	0	8
A. digitifera	2021-10-28	2021-10-31	3	ADIG17	Heat-stressed	8	0	8
A. digitifera	2021-10-28	2021-10-31	3	ADIG18	Heat-stressed	8	0	8
A. digitifera	2021-10-28	2021-10-31	3	ADIG19	Heat-stressed	8	0	8
A. digitifera	2021-10-28	2021-10-31	3	ADIG20	Heat-stressed	8	0	8
A. digitifera	2021-10-28	2021-10-31	3	ADIG21	Heat-stressed	8	0	8
A. digitifera	2021-10-28	2021-10-31	3	ADIG22	Heat-stressed	8	0	8
A. digitifera	2021-10-28	2021-10-31	3	ADIG23	Heat-stressed	8	0	8
A. digitifera	2021-10-28	2021-10-31	3	ADIG24	Heat-stressed	8	0	8
A. digitifera	2021-10-28	2021-10-31	3	ADIG25	Heat-stressed	8	0	8
A. digitifera	2021-10-28	2021-10-31	3	ADIG26	Heat-stressed	8	0	8
A. digitifera	2021-10-28	2021-10-31	3	ADIG27	Heat-stressed	8	0	8
A. digitifera	2021-10-28	2021-10-31	3	ADIG28	Heat-stressed	8	0	8
A. digitifera	2021-10-28	2021-10-31	3	ADIG29	Heat-stressed	8	0	8
A. digitifera	2021-10-28	2021-10-31	3	ADIG30	Heat-stressed	8	0	8
A. digitifera	2021-10-28	2021-10-31	3	ADIG31	Heat-stressed	8	0	8
A. digitifera	2021-10-28	2021-10-31	3	ADIG32	Heat-stressed	8	0	8
A. digitifera	2021-10-28	2021-10-31	3	ADIG33	Heat-stressed	8	0	8
A. digitifera	2021-10-28	2021-10-31	3	ADIG34	Heat-stressed	8	0	8
A. digitifera	2021-10-28	2021-10-31	3	ADIG35	Heat-stressed	8	0	8
A. digitifera	2021-10-28	2021-10-31	3	ADIG36	Heat-stressed	8	0	8
A. digitifera	2021-10-28	2021-10-31	3	ADIG37	Heat-stressed	8	0	8
A. digitifera	2021-10-28	2021-10-31	3	ADIG38	Heat-stressed	8	0	8
A. digitifera	2021-10-28	2021-10-31	3	ADIG39	Heat-stressed	8	0	8
A. digitifera	2021-10-28	2021-10-31	3	ADIG40	Heat-stressed	8	0	8
A. digitifera	2021-10-28	2021-11-01	4	ADIG01	Control	8	0	8
A. digitifera	2021-10-28	2021-11-01	4	ADIG02	Control	8	0	8
A. digitifera	2021-10-28	2021-11-01	4	ADIG03	Control	8	0	8
A. digitifera	2021-10-28	2021-11-01	4	ADIG04	Control	8	0	8
A. digitifera	2021-10-28	2021-11-01	4	ADIG05	Control	8	0	8
A. digitifera	2021-10-28	2021-11-01	4	ADIG06	Control	8	0	8
A. digitifera	2021-10-28	2021-11-01	4	ADIG07	Control	7	0	7
A. digitifera	2021-10-28	2021-11-01	4	ADIG08	Control	8	0	8
A. digitifera	2021-10-28	2021-11-01	4	ADIG09	Control	7	0	7
A. digitifera	2021-10-28	2021-11-01	4	ADIG10	Control	8	0	8
A. digitifera	2021-10-28	2021-11-01	4	ADIG11	Control	8	0	8
A. digitifera	2021-10-28	2021-11-01	4	ADIG12	Control	8	0	8
A. digitifera	2021-10-28	2021-11-01	4	ADIG13	Control	8	0	8
A. digitifera	2021-10-28	2021-11-01	4	ADIG14	Control	8	0	8
A. digitifera	2021-10-28	2021-11-01	4	ADIG15	Control	8	0	8
A. digitifera	2021-10-28	2021-11-01	4	ADIG16	Control	8	0	8
A. digitifera	2021-10-28	2021-11-01	4	ADIG17	Control	8	0	8
A. digitifera	2021-10-28	2021-11-01	4	ADIG18	Control	8	0	8
A. digitifera	2021-10-28	2021-11-01	4	ADIG19	Control	8	0	8
A. digitifera	2021-10-28	2021-11-01	4	ADIG20	Control	8	0	8
A. digitifera	2021-10-28	2021-11-01	4	ADIG21	Control	8	0	8
A. digitifera	2021-10-28	2021-11-01	4	ADIG22	Control	8	0	8
A. digitifera	2021-10-28	2021-11-01	4	ADIG23	Control	8	0	8
A. digitifera	2021-10-28	2021-11-01	4	ADIG24	Control	8	0	8
A. digitifera	2021-10-28	2021-11-01	4	ADIG25	Control	8	0	8
A. digitifera	2021-10-28	2021-11-01	4	ADIG26	Control	8	0	8
A. digitifera	2021-10-28	2021-11-01	4	ADIG27	Control	8	0	8
A. digitifera	2021-10-28	2021-11-01	4	ADIG28	Control	8	0	8
A. digitifera	2021-10-28	2021-11-01	4	ADIG29	Control	8	0	8
A. digitifera	2021-10-28	2021-11-01	4	ADIG30	Control	8	0	8
A. digitifera	2021-10-28	2021-11-01	4	ADIG31	Control	8	0	8
A. digitifera	2021-10-28	2021-11-01	4	ADIG32	Control	8	0	8
A. digitifera	2021-10-28	2021-11-01	4	ADIG33	Control	8	0	8
A. digitifera	2021-10-28	2021-11-01	4	ADIG34	Control	8	0	8
A. digitifera	2021-10-28	2021-11-01	4	ADIG35	Control	8	0	8
A. digitifera	2021-10-28	2021-11-01	4	ADIG36	Control	8	0	8
A. digitifera	2021-10-28	2021-11-01	4	ADIG37	Control	8	0	8
A. digitifera	2021-10-28	2021-11-01	4	ADIG38	Control	8	0	8
A. digitifera	2021-10-28	2021-11-01	4	ADIG39	Control	8	0	8
A. digitifera	2021-10-28	2021-11-01	4	ADIG40	Control	8	0	8
A. digitifera	2021-10-28	2021-11-01	4	ADIG01	Heat-stressed	8	0	8
A. digitifera	2021-10-28	2021-11-01	4	ADIG02	Heat-stressed	8	0	8
A. digitifera	2021-10-28	2021-11-01	4	ADIG03	Heat-stressed	8	0	8
A. digitifera	2021-10-28	2021-11-01	4	ADIG04	Heat-stressed	7	0	7
A. digitifera	2021-10-28	2021-11-01	4	ADIG05	Heat-stressed	8	0	8
A. digitifera	2021-10-28	2021-11-01	4	ADIG06	Heat-stressed	8	0	8
A. digitifera	2021-10-28	2021-11-01	4	ADIG07	Heat-stressed	7	0	7
A. digitifera	2021-10-28	2021-11-01	4	ADIG08	Heat-stressed	8	0	8
A. digitifera	2021-10-28	2021-11-01	4	ADIG09	Heat-stressed	8	0	8
A. digitifera	2021-10-28	2021-11-01	4	ADIG10	Heat-stressed	8	0	8
A. digitifera	2021-10-28	2021-11-01	4	ADIG11	Heat-stressed	8	0	8
A. digitifera	2021-10-28	2021-11-01	4	ADIG12	Heat-stressed	8	0	8
A. digitifera	2021-10-28	2021-11-01	4	ADIG13	Heat-stressed	8	0	8
A. digitifera	2021-10-28	2021-11-01	4	ADIG14	Heat-stressed	8	0	8
A. digitifera	2021-10-28	2021-11-01	4	ADIG15	Heat-stressed	8	0	8
A. digitifera	2021-10-28	2021-11-01	4	ADIG16	Heat-stressed	8	0	8
A. digitifera	2021-10-28	2021-11-01	4	ADIG17	Heat-stressed	8	0	8
A. digitifera	2021-10-28	2021-11-01	4	ADIG18	Heat-stressed	8	0	8
A. digitifera	2021-10-28	2021-11-01	4	ADIG19	Heat-stressed	8	0	8
A. digitifera	2021-10-28	2021-11-01	4	ADIG20	Heat-stressed	8	0	8
A. digitifera	2021-10-28	2021-11-01	4	ADIG21	Heat-stressed	8	0	8
A. digitifera	2021-10-28	2021-11-01	4	ADIG22	Heat-stressed	8	0	8
A. digitifera	2021-10-28	2021-11-01	4	ADIG23	Heat-stressed	8	0	8
A. digitifera	2021-10-28	2021-11-01	4	ADIG24	Heat-stressed	8	0	8
A. digitifera	2021-10-28	2021-11-01	4	ADIG25	Heat-stressed	8	0	8
A. digitifera	2021-10-28	2021-11-01	4	ADIG26	Heat-stressed	8	0	8
A. digitifera	2021-10-28	2021-11-01	4	ADIG27	Heat-stressed	8	0	8
A. digitifera	2021-10-28	2021-11-01	4	ADIG28	Heat-stressed	8	0	8
A. digitifera	2021-10-28	2021-11-01	4	ADIG29	Heat-stressed	8	0	8
A. digitifera	2021-10-28	2021-11-01	4	ADIG30	Heat-stressed	8	0	8
A. digitifera	2021-10-28	2021-11-01	4	ADIG31	Heat-stressed	8	0	8
A. digitifera	2021-10-28	2021-11-01	4	ADIG32	Heat-stressed	8	0	8
A. digitifera	2021-10-28	2021-11-01	4	ADIG33	Heat-stressed	8	0	8
A. digitifera	2021-10-28	2021-11-01	4	ADIG34	Heat-stressed	8	0	8
A. digitifera	2021-10-28	2021-11-01	4	ADIG35	Heat-stressed	8	0	8
A. digitifera	2021-10-28	2021-11-01	4	ADIG36	Heat-stressed	8	0	8
A. digitifera	2021-10-28	2021-11-01	4	ADIG37	Heat-stressed	8	0	8
A. digitifera	2021-10-28	2021-11-01	4	ADIG38	Heat-stressed	8	0	8
A. digitifera	2021-10-28	2021-11-01	4	ADIG39	Heat-stressed	8	0	8
A. digitifera	2021-10-28	2021-11-01	4	ADIG40	Heat-stressed	8	0	8
A. digitifera	2021-10-28	2021-11-02	5	ADIG01	Control	8	0	8
A. digitifera	2021-10-28	2021-11-02	5	ADIG02	Control	8	0	8
A. digitifera	2021-10-28	2021-11-02	5	ADIG03	Control	8	0	8
A. digitifera	2021-10-28	2021-11-02	5	ADIG04	Control	8	0	8
A. digitifera	2021-10-28	2021-11-02	5	ADIG05	Control	8	0	8
A. digitifera	2021-10-28	2021-11-02	5	ADIG06	Control	8	0	8
A. digitifera	2021-10-28	2021-11-02	5	ADIG07	Control	7	0	7
A. digitifera	2021-10-28	2021-11-02	5	ADIG08	Control	8	0	8
A. digitifera	2021-10-28	2021-11-02	5	ADIG09	Control	7	0	7
A. digitifera	2021-10-28	2021-11-02	5	ADIG10	Control	8	0	8
A. digitifera	2021-10-28	2021-11-02	5	ADIG11	Control	8	0	8
A. digitifera	2021-10-28	2021-11-02	5	ADIG12	Control	8	0	8
A. digitifera	2021-10-28	2021-11-02	5	ADIG13	Control	8	0	8
A. digitifera	2021-10-28	2021-11-02	5	ADIG14	Control	8	0	8
A. digitifera	2021-10-28	2021-11-02	5	ADIG15	Control	8	0	8
A. digitifera	2021-10-28	2021-11-02	5	ADIG16	Control	8	0	8
A. digitifera	2021-10-28	2021-11-02	5	ADIG17	Control	8	0	8
A. digitifera	2021-10-28	2021-11-02	5	ADIG18	Control	8	0	8
A. digitifera	2021-10-28	2021-11-02	5	ADIG19	Control	8	0	8
A. digitifera	2021-10-28	2021-11-02	5	ADIG20	Control	8	0	8
A. digitifera	2021-10-28	2021-11-02	5	ADIG21	Control	8	0	8
A. digitifera	2021-10-28	2021-11-02	5	ADIG22	Control	8	0	8
A. digitifera	2021-10-28	2021-11-02	5	ADIG23	Control	8	0	8
A. digitifera	2021-10-28	2021-11-02	5	ADIG24	Control	8	0	8
A. digitifera	2021-10-28	2021-11-02	5	ADIG25	Control	8	0	8
A. digitifera	2021-10-28	2021-11-02	5	ADIG26	Control	8	0	8
A. digitifera	2021-10-28	2021-11-02	5	ADIG27	Control	8	0	8
A. digitifera	2021-10-28	2021-11-02	5	ADIG28	Control	8	0	8
A. digitifera	2021-10-28	2021-11-02	5	ADIG29	Control	8	0	8
A. digitifera	2021-10-28	2021-11-02	5	ADIG30	Control	8	0	8
A. digitifera	2021-10-28	2021-11-02	5	ADIG31	Control	8	0	8
A. digitifera	2021-10-28	2021-11-02	5	ADIG32	Control	8	0	8
A. digitifera	2021-10-28	2021-11-02	5	ADIG33	Control	8	0	8
A. digitifera	2021-10-28	2021-11-02	5	ADIG34	Control	8	0	8
A. digitifera	2021-10-28	2021-11-02	5	ADIG35	Control	8	0	8
A. digitifera	2021-10-28	2021-11-02	5	ADIG36	Control	8	0	8
A. digitifera	2021-10-28	2021-11-02	5	ADIG37	Control	8	0	8
A. digitifera	2021-10-28	2021-11-02	5	ADIG38	Control	8	0	8
A. digitifera	2021-10-28	2021-11-02	5	ADIG39	Control	8	0	8
A. digitifera	2021-10-28	2021-11-02	5	ADIG40	Control	8	0	8
A. digitifera	2021-10-28	2021-11-02	5	ADIG01	Heat-stressed	8	0	8
A. digitifera	2021-10-28	2021-11-02	5	ADIG02	Heat-stressed	8	0	8
A. digitifera	2021-10-28	2021-11-02	5	ADIG03	Heat-stressed	8	0	8
A. digitifera	2021-10-28	2021-11-02	5	ADIG04	Heat-stressed	7	0	7
A. digitifera	2021-10-28	2021-11-02	5	ADIG05	Heat-stressed	8	0	8
A. digitifera	2021-10-28	2021-11-02	5	ADIG06	Heat-stressed	8	0	8
A. digitifera	2021-10-28	2021-11-02	5	ADIG07	Heat-stressed	7	0	7
A. digitifera	2021-10-28	2021-11-02	5	ADIG08	Heat-stressed	8	0	8
A. digitifera	2021-10-28	2021-11-02	5	ADIG09	Heat-stressed	8	0	8
A. digitifera	2021-10-28	2021-11-02	5	ADIG10	Heat-stressed	8	0	8
A. digitifera	2021-10-28	2021-11-02	5	ADIG11	Heat-stressed	8	0	8
A. digitifera	2021-10-28	2021-11-02	5	ADIG12	Heat-stressed	8	0	8
A. digitifera	2021-10-28	2021-11-02	5	ADIG13	Heat-stressed	8	0	8
A. digitifera	2021-10-28	2021-11-02	5	ADIG14	Heat-stressed	8	0	8
A. digitifera	2021-10-28	2021-11-02	5	ADIG15	Heat-stressed	8	0	8
A. digitifera	2021-10-28	2021-11-02	5	ADIG16	Heat-stressed	8	0	8
A. digitifera	2021-10-28	2021-11-02	5	ADIG17	Heat-stressed	8	0	8
A. digitifera	2021-10-28	2021-11-02	5	ADIG18	Heat-stressed	8	0	8
A. digitifera	2021-10-28	2021-11-02	5	ADIG19	Heat-stressed	8	0	8
A. digitifera	2021-10-28	2021-11-02	5	ADIG20	Heat-stressed	8	0	8
A. digitifera	2021-10-28	2021-11-02	5	ADIG21	Heat-stressed	8	0	8
A. digitifera	2021-10-28	2021-11-02	5	ADIG22	Heat-stressed	8	0	8
A. digitifera	2021-10-28	2021-11-02	5	ADIG23	Heat-stressed	8	0	8
A. digitifera	2021-10-28	2021-11-02	5	ADIG24	Heat-stressed	8	0	8
A. digitifera	2021-10-28	2021-11-02	5	ADIG25	Heat-stressed	8	0	8
A. digitifera	2021-10-28	2021-11-02	5	ADIG26	Heat-stressed	8	0	8
A. digitifera	2021-10-28	2021-11-02	5	ADIG27	Heat-stressed	8	0	8
A. digitifera	2021-10-28	2021-11-02	5	ADIG28	Heat-stressed	8	0	8
A. digitifera	2021-10-28	2021-11-02	5	ADIG29	Heat-stressed	8	0	8
A. digitifera	2021-10-28	2021-11-02	5	ADIG30	Heat-stressed	8	0	8
A. digitifera	2021-10-28	2021-11-02	5	ADIG31	Heat-stressed	8	0	8
A. digitifera	2021-10-28	2021-11-02	5	ADIG32	Heat-stressed	8	0	8
A. digitifera	2021-10-28	2021-11-02	5	ADIG33	Heat-stressed	8	0	8
A. digitifera	2021-10-28	2021-11-02	5	ADIG34	Heat-stressed	8	0	8
A. digitifera	2021-10-28	2021-11-02	5	ADIG35	Heat-stressed	8	0	8
A. digitifera	2021-10-28	2021-11-02	5	ADIG36	Heat-stressed	8	0	8
A. digitifera	2021-10-28	2021-11-02	5	ADIG37	Heat-stressed	8	0	8
A. digitifera	2021-10-28	2021-11-02	5	ADIG38	Heat-stressed	8	0	8
A. digitifera	2021-10-28	2021-11-02	5	ADIG39	Heat-stressed	8	0	8
A. digitifera	2021-10-28	2021-11-02	5	ADIG40	Heat-stressed	8	0	8
A. digitifera	2021-10-28	2021-11-03	6	ADIG01	Control	8	0	8
A. digitifera	2021-10-28	2021-11-03	6	ADIG02	Control	8	0	8
A. digitifera	2021-10-28	2021-11-03	6	ADIG03	Control	8	0	8
A. digitifera	2021-10-28	2021-11-03	6	ADIG04	Control	8	0	8
A. digitifera	2021-10-28	2021-11-03	6	ADIG05	Control	8	0	8
A. digitifera	2021-10-28	2021-11-03	6	ADIG06	Control	8	0	8
A. digitifera	2021-10-28	2021-11-03	6	ADIG07	Control	7	0	7
A. digitifera	2021-10-28	2021-11-03	6	ADIG08	Control	8	0	8
A. digitifera	2021-10-28	2021-11-03	6	ADIG09	Control	7	0	7
A. digitifera	2021-10-28	2021-11-03	6	ADIG10	Control	8	0	8
A. digitifera	2021-10-28	2021-11-03	6	ADIG11	Control	8	0	8
A. digitifera	2021-10-28	2021-11-03	6	ADIG12	Control	8	0	8
A. digitifera	2021-10-28	2021-11-03	6	ADIG13	Control	8	0	8
A. digitifera	2021-10-28	2021-11-03	6	ADIG14	Control	8	0	8
A. digitifera	2021-10-28	2021-11-03	6	ADIG15	Control	8	0	8
A. digitifera	2021-10-28	2021-11-03	6	ADIG16	Control	8	0	8
A. digitifera	2021-10-28	2021-11-03	6	ADIG17	Control	8	0	8
A. digitifera	2021-10-28	2021-11-03	6	ADIG18	Control	8	0	8
A. digitifera	2021-10-28	2021-11-03	6	ADIG19	Control	8	0	8
A. digitifera	2021-10-28	2021-11-03	6	ADIG20	Control	8	0	8
A. digitifera	2021-10-28	2021-11-03	6	ADIG21	Control	8	0	8
A. digitifera	2021-10-28	2021-11-03	6	ADIG22	Control	8	0	8
A. digitifera	2021-10-28	2021-11-03	6	ADIG23	Control	8	0	8
A. digitifera	2021-10-28	2021-11-03	6	ADIG24	Control	8	0	8
A. digitifera	2021-10-28	2021-11-03	6	ADIG25	Control	8	0	8
A. digitifera	2021-10-28	2021-11-03	6	ADIG26	Control	8	0	8
A. digitifera	2021-10-28	2021-11-03	6	ADIG27	Control	8	0	8
A. digitifera	2021-10-28	2021-11-03	6	ADIG28	Control	8	0	8
A. digitifera	2021-10-28	2021-11-03	6	ADIG29	Control	8	0	8
A. digitifera	2021-10-28	2021-11-03	6	ADIG30	Control	8	0	8
A. digitifera	2021-10-28	2021-11-03	6	ADIG31	Control	8	0	8
A. digitifera	2021-10-28	2021-11-03	6	ADIG32	Control	8	0	8
A. digitifera	2021-10-28	2021-11-03	6	ADIG33	Control	8	0	8
A. digitifera	2021-10-28	2021-11-03	6	ADIG34	Control	8	0	8
A. digitifera	2021-10-28	2021-11-03	6	ADIG35	Control	8	0	8
A. digitifera	2021-10-28	2021-11-03	6	ADIG36	Control	8	0	8
A. digitifera	2021-10-28	2021-11-03	6	ADIG37	Control	8	0	8
A. digitifera	2021-10-28	2021-11-03	6	ADIG38	Control	8	0	8
A. digitifera	2021-10-28	2021-11-03	6	ADIG39	Control	8	0	8
A. digitifera	2021-10-28	2021-11-03	6	ADIG40	Control	8	0	8
A. digitifera	2021-10-28	2021-11-03	6	ADIG01	Heat-stressed	8	0	8
A. digitifera	2021-10-28	2021-11-03	6	ADIG02	Heat-stressed	8	0	8
A. digitifera	2021-10-28	2021-11-03	6	ADIG03	Heat-stressed	8	0	8
A. digitifera	2021-10-28	2021-11-03	6	ADIG04	Heat-stressed	7	0	7
A. digitifera	2021-10-28	2021-11-03	6	ADIG05	Heat-stressed	8	0	8
A. digitifera	2021-10-28	2021-11-03	6	ADIG06	Heat-stressed	8	0	8
A. digitifera	2021-10-28	2021-11-03	6	ADIG07	Heat-stressed	7	0	7
A. digitifera	2021-10-28	2021-11-03	6	ADIG08	Heat-stressed	8	0	8
A. digitifera	2021-10-28	2021-11-03	6	ADIG09	Heat-stressed	8	0	8
A. digitifera	2021-10-28	2021-11-03	6	ADIG10	Heat-stressed	8	0	8
A. digitifera	2021-10-28	2021-11-03	6	ADIG11	Heat-stressed	8	0	8
A. digitifera	2021-10-28	2021-11-03	6	ADIG12	Heat-stressed	8	0	8
A. digitifera	2021-10-28	2021-11-03	6	ADIG13	Heat-stressed	8	0	8
A. digitifera	2021-10-28	2021-11-03	6	ADIG14	Heat-stressed	8	0	8
A. digitifera	2021-10-28	2021-11-03	6	ADIG15	Heat-stressed	8	0	8
A. digitifera	2021-10-28	2021-11-03	6	ADIG16	Heat-stressed	8	0	8
A. digitifera	2021-10-28	2021-11-03	6	ADIG17	Heat-stressed	8	0	8
A. digitifera	2021-10-28	2021-11-03	6	ADIG18	Heat-stressed	8	0	8
A. digitifera	2021-10-28	2021-11-03	6	ADIG19	Heat-stressed	8	0	8
A. digitifera	2021-10-28	2021-11-03	6	ADIG20	Heat-stressed	8	0	8
A. digitifera	2021-10-28	2021-11-03	6	ADIG21	Heat-stressed	8	0	8
A. digitifera	2021-10-28	2021-11-03	6	ADIG22	Heat-stressed	8	0	8
A. digitifera	2021-10-28	2021-11-03	6	ADIG23	Heat-stressed	8	0	8
A. digitifera	2021-10-28	2021-11-03	6	ADIG24	Heat-stressed	8	0	8
A. digitifera	2021-10-28	2021-11-03	6	ADIG25	Heat-stressed	8	0	8
A. digitifera	2021-10-28	2021-11-03	6	ADIG26	Heat-stressed	8	0	8
A. digitifera	2021-10-28	2021-11-03	6	ADIG27	Heat-stressed	8	0	8
A. digitifera	2021-10-28	2021-11-03	6	ADIG28	Heat-stressed	8	0	8
A. digitifera	2021-10-28	2021-11-03	6	ADIG29	Heat-stressed	8	0	8
A. digitifera	2021-10-28	2021-11-03	6	ADIG30	Heat-stressed	8	0	8
A. digitifera	2021-10-28	2021-11-03	6	ADIG31	Heat-stressed	8	0	8
A. digitifera	2021-10-28	2021-11-03	6	ADIG32	Heat-stressed	8	0	8
A. digitifera	2021-10-28	2021-11-03	6	ADIG33	Heat-stressed	8	0	8
A. digitifera	2021-10-28	2021-11-03	6	ADIG34	Heat-stressed	8	0	8
A. digitifera	2021-10-28	2021-11-03	6	ADIG35	Heat-stressed	8	0	8
A. digitifera	2021-10-28	2021-11-03	6	ADIG36	Heat-stressed	8	0	8
A. digitifera	2021-10-28	2021-11-03	6	ADIG37	Heat-stressed	8	0	8
A. digitifera	2021-10-28	2021-11-03	6	ADIG38	Heat-stressed	8	0	8
A. digitifera	2021-10-28	2021-11-03	6	ADIG39	Heat-stressed	8	0	8
A. digitifera	2021-10-28	2021-11-03	6	ADIG40	Heat-stressed	8	0	8
A. digitifera	2021-10-28	2021-11-04	7	ADIG01	Control	8	0	8
A. digitifera	2021-10-28	2021-11-04	7	ADIG02	Control	8	0	8
A. digitifera	2021-10-28	2021-11-04	7	ADIG03	Control	8	0	8
A. digitifera	2021-10-28	2021-11-04	7	ADIG04	Control	8	0	8
A. digitifera	2021-10-28	2021-11-04	7	ADIG05	Control	8	0	8
A. digitifera	2021-10-28	2021-11-04	7	ADIG06	Control	8	0	8
A. digitifera	2021-10-28	2021-11-04	7	ADIG07	Control	7	0	7
A. digitifera	2021-10-28	2021-11-04	7	ADIG08	Control	8	0	8
A. digitifera	2021-10-28	2021-11-04	7	ADIG09	Control	7	0	7
A. digitifera	2021-10-28	2021-11-04	7	ADIG10	Control	8	0	8
A. digitifera	2021-10-28	2021-11-04	7	ADIG11	Control	8	0	8
A. digitifera	2021-10-28	2021-11-04	7	ADIG12	Control	8	0	8
A. digitifera	2021-10-28	2021-11-04	7	ADIG13	Control	8	0	8
A. digitifera	2021-10-28	2021-11-04	7	ADIG14	Control	8	0	8
A. digitifera	2021-10-28	2021-11-04	7	ADIG15	Control	8	0	8
A. digitifera	2021-10-28	2021-11-04	7	ADIG16	Control	8	0	8
A. digitifera	2021-10-28	2021-11-04	7	ADIG17	Control	8	0	8
A. digitifera	2021-10-28	2021-11-04	7	ADIG18	Control	8	0	8
A. digitifera	2021-10-28	2021-11-04	7	ADIG19	Control	8	0	8
A. digitifera	2021-10-28	2021-11-04	7	ADIG20	Control	8	0	8
A. digitifera	2021-10-28	2021-11-04	7	ADIG21	Control	8	0	8
A. digitifera	2021-10-28	2021-11-04	7	ADIG22	Control	8	0	8
A. digitifera	2021-10-28	2021-11-04	7	ADIG23	Control	8	0	8
A. digitifera	2021-10-28	2021-11-04	7	ADIG24	Control	8	0	8
A. digitifera	2021-10-28	2021-11-04	7	ADIG25	Control	8	0	8
A. digitifera	2021-10-28	2021-11-04	7	ADIG26	Control	8	0	8
A. digitifera	2021-10-28	2021-11-04	7	ADIG27	Control	8	0	8
A. digitifera	2021-10-28	2021-11-04	7	ADIG28	Control	8	0	8
A. digitifera	2021-10-28	2021-11-04	7	ADIG29	Control	8	0	8
A. digitifera	2021-10-28	2021-11-04	7	ADIG30	Control	8	0	8
A. digitifera	2021-10-28	2021-11-04	7	ADIG31	Control	8	0	8
A. digitifera	2021-10-28	2021-11-04	7	ADIG32	Control	8	0	8
A. digitifera	2021-10-28	2021-11-04	7	ADIG33	Control	8	0	8
A. digitifera	2021-10-28	2021-11-04	7	ADIG34	Control	8	0	8
A. digitifera	2021-10-28	2021-11-04	7	ADIG35	Control	8	0	8
A. digitifera	2021-10-28	2021-11-04	7	ADIG36	Control	8	0	8
A. digitifera	2021-10-28	2021-11-04	7	ADIG37	Control	8	0	8
A. digitifera	2021-10-28	2021-11-04	7	ADIG38	Control	8	0	8
A. digitifera	2021-10-28	2021-11-04	7	ADIG39	Control	8	0	8
A. digitifera	2021-10-28	2021-11-04	7	ADIG40	Control	8	0	8
A. digitifera	2021-10-28	2021-11-04	7	ADIG01	Heat-stressed	8	0	8
A. digitifera	2021-10-28	2021-11-04	7	ADIG02	Heat-stressed	8	0	8
A. digitifera	2021-10-28	2021-11-04	7	ADIG03	Heat-stressed	8	0	8
A. digitifera	2021-10-28	2021-11-04	7	ADIG04	Heat-stressed	7	0	7
A. digitifera	2021-10-28	2021-11-04	7	ADIG05	Heat-stressed	8	0	8
A. digitifera	2021-10-28	2021-11-04	7	ADIG06	Heat-stressed	8	0	8
A. digitifera	2021-10-28	2021-11-04	7	ADIG07	Heat-stressed	7	0	7
A. digitifera	2021-10-28	2021-11-04	7	ADIG08	Heat-stressed	8	0	8
A. digitifera	2021-10-28	2021-11-04	7	ADIG09	Heat-stressed	8	0	8
A. digitifera	2021-10-28	2021-11-04	7	ADIG10	Heat-stressed	8	0	8
A. digitifera	2021-10-28	2021-11-04	7	ADIG11	Heat-stressed	8	0	8
A. digitifera	2021-10-28	2021-11-04	7	ADIG12	Heat-stressed	8	0	8
A. digitifera	2021-10-28	2021-11-04	7	ADIG13	Heat-stressed	8	0	8
A. digitifera	2021-10-28	2021-11-04	7	ADIG14	Heat-stressed	8	0	8
A. digitifera	2021-10-28	2021-11-04	7	ADIG15	Heat-stressed	8	0	8
A. digitifera	2021-10-28	2021-11-04	7	ADIG16	Heat-stressed	8	0	8
A. digitifera	2021-10-28	2021-11-04	7	ADIG17	Heat-stressed	8	0	8
A. digitifera	2021-10-28	2021-11-04	7	ADIG18	Heat-stressed	8	0	8
A. digitifera	2021-10-28	2021-11-04	7	ADIG19	Heat-stressed	8	0	8
A. digitifera	2021-10-28	2021-11-04	7	ADIG20	Heat-stressed	8	0	8
A. digitifera	2021-10-28	2021-11-04	7	ADIG21	Heat-stressed	8	0	8
A. digitifera	2021-10-28	2021-11-04	7	ADIG22	Heat-stressed	8	0	8
A. digitifera	2021-10-28	2021-11-04	7	ADIG23	Heat-stressed	8	0	8
A. digitifera	2021-10-28	2021-11-04	7	ADIG24	Heat-stressed	8	0	8
A. digitifera	2021-10-28	2021-11-04	7	ADIG25	Heat-stressed	8	0	8
A. digitifera	2021-10-28	2021-11-04	7	ADIG26	Heat-stressed	8	0	8
A. digitifera	2021-10-28	2021-11-04	7	ADIG27	Heat-stressed	8	0	8
A. digitifera	2021-10-28	2021-11-04	7	ADIG28	Heat-stressed	8	0	8
A. digitifera	2021-10-28	2021-11-04	7	ADIG29	Heat-stressed	8	0	8
A. digitifera	2021-10-28	2021-11-04	7	ADIG30	Heat-stressed	8	0	8
A. digitifera	2021-10-28	2021-11-04	7	ADIG31	Heat-stressed	8	0	8
A. digitifera	2021-10-28	2021-11-04	7	ADIG32	Heat-stressed	8	0	8
A. digitifera	2021-10-28	2021-11-04	7	ADIG33	Heat-stressed	8	0	8
A. digitifera	2021-10-28	2021-11-04	7	ADIG34	Heat-stressed	8	0	8
A. digitifera	2021-10-28	2021-11-04	7	ADIG35	Heat-stressed	8	0	8
A. digitifera	2021-10-28	2021-11-04	7	ADIG36	Heat-stressed	8	0	8
A. digitifera	2021-10-28	2021-11-04	7	ADIG37	Heat-stressed	8	0	8
A. digitifera	2021-10-28	2021-11-04	7	ADIG38	Heat-stressed	8	0	8
A. digitifera	2021-10-28	2021-11-04	7	ADIG39	Heat-stressed	8	0	8
A. digitifera	2021-10-28	2021-11-04	7	ADIG40	Heat-stressed	8	0	8
A. digitifera	2021-10-28	2021-11-05	8	ADIG01	Control	8	0	8
A. digitifera	2021-10-28	2021-11-05	8	ADIG02	Control	8	0	8
A. digitifera	2021-10-28	2021-11-05	8	ADIG03	Control	8	0	8
A. digitifera	2021-10-28	2021-11-05	8	ADIG04	Control	8	0	8
A. digitifera	2021-10-28	2021-11-05	8	ADIG05	Control	8	0	8
A. digitifera	2021-10-28	2021-11-05	8	ADIG06	Control	8	0	8
A. digitifera	2021-10-28	2021-11-05	8	ADIG07	Control	7	0	7
A. digitifera	2021-10-28	2021-11-05	8	ADIG08	Control	8	0	8
A. digitifera	2021-10-28	2021-11-05	8	ADIG09	Control	7	0	7
A. digitifera	2021-10-28	2021-11-05	8	ADIG10	Control	8	0	8
A. digitifera	2021-10-28	2021-11-05	8	ADIG11	Control	8	0	8
A. digitifera	2021-10-28	2021-11-05	8	ADIG12	Control	8	0	8
A. digitifera	2021-10-28	2021-11-05	8	ADIG13	Control	8	0	8
A. digitifera	2021-10-28	2021-11-05	8	ADIG14	Control	8	0	8
A. digitifera	2021-10-28	2021-11-05	8	ADIG15	Control	8	0	8
A. digitifera	2021-10-28	2021-11-05	8	ADIG16	Control	8	0	8
A. digitifera	2021-10-28	2021-11-05	8	ADIG17	Control	8	0	8
A. digitifera	2021-10-28	2021-11-05	8	ADIG18	Control	8	0	8
A. digitifera	2021-10-28	2021-11-05	8	ADIG19	Control	8	0	8
A. digitifera	2021-10-28	2021-11-05	8	ADIG20	Control	8	0	8
A. digitifera	2021-10-28	2021-11-05	8	ADIG21	Control	8	0	8
A. digitifera	2021-10-28	2021-11-05	8	ADIG22	Control	8	0	8
A. digitifera	2021-10-28	2021-11-05	8	ADIG23	Control	8	0	8
A. digitifera	2021-10-28	2021-11-05	8	ADIG24	Control	8	0	8
A. digitifera	2021-10-28	2021-11-05	8	ADIG25	Control	8	0	8
A. digitifera	2021-10-28	2021-11-05	8	ADIG26	Control	8	0	8
A. digitifera	2021-10-28	2021-11-05	8	ADIG27	Control	8	0	8
A. digitifera	2021-10-28	2021-11-05	8	ADIG28	Control	8	0	8
A. digitifera	2021-10-28	2021-11-05	8	ADIG29	Control	8	0	8
A. digitifera	2021-10-28	2021-11-05	8	ADIG30	Control	8	0	8
A. digitifera	2021-10-28	2021-11-05	8	ADIG31	Control	8	0	8
A. digitifera	2021-10-28	2021-11-05	8	ADIG32	Control	8	0	8
A. digitifera	2021-10-28	2021-11-05	8	ADIG33	Control	8	0	8
A. digitifera	2021-10-28	2021-11-05	8	ADIG34	Control	8	0	8
A. digitifera	2021-10-28	2021-11-05	8	ADIG35	Control	8	0	8
A. digitifera	2021-10-28	2021-11-05	8	ADIG36	Control	8	0	8
A. digitifera	2021-10-28	2021-11-05	8	ADIG37	Control	8	0	8
A. digitifera	2021-10-28	2021-11-05	8	ADIG38	Control	8	0	8
A. digitifera	2021-10-28	2021-11-05	8	ADIG39	Control	8	0	8
A. digitifera	2021-10-28	2021-11-05	8	ADIG40	Control	8	0	8
A. digitifera	2021-10-28	2021-11-05	8	ADIG01	Heat-stressed	8	0	8
A. digitifera	2021-10-28	2021-11-05	8	ADIG02	Heat-stressed	8	0	8
A. digitifera	2021-10-28	2021-11-05	8	ADIG03	Heat-stressed	8	0	8
A. digitifera	2021-10-28	2021-11-05	8	ADIG04	Heat-stressed	7	0	7
A. digitifera	2021-10-28	2021-11-05	8	ADIG05	Heat-stressed	8	0	8
A. digitifera	2021-10-28	2021-11-05	8	ADIG06	Heat-stressed	8	0	8
A. digitifera	2021-10-28	2021-11-05	8	ADIG07	Heat-stressed	7	0	7
A. digitifera	2021-10-28	2021-11-05	8	ADIG08	Heat-stressed	8	0	8
A. digitifera	2021-10-28	2021-11-05	8	ADIG09	Heat-stressed	8	0	8
A. digitifera	2021-10-28	2021-11-05	8	ADIG10	Heat-stressed	8	0	8
A. digitifera	2021-10-28	2021-11-05	8	ADIG11	Heat-stressed	8	0	8
A. digitifera	2021-10-28	2021-11-05	8	ADIG12	Heat-stressed	8	0	8
A. digitifera	2021-10-28	2021-11-05	8	ADIG13	Heat-stressed	8	0	8
A. digitifera	2021-10-28	2021-11-05	8	ADIG14	Heat-stressed	8	0	8
A. digitifera	2021-10-28	2021-11-05	8	ADIG15	Heat-stressed	8	0	8
A. digitifera	2021-10-28	2021-11-05	8	ADIG16	Heat-stressed	8	0	8
A. digitifera	2021-10-28	2021-11-05	8	ADIG17	Heat-stressed	8	0	8
A. digitifera	2021-10-28	2021-11-05	8	ADIG18	Heat-stressed	8	0	8
A. digitifera	2021-10-28	2021-11-05	8	ADIG19	Heat-stressed	8	0	8
A. digitifera	2021-10-28	2021-11-05	8	ADIG20	Heat-stressed	8	0	8
A. digitifera	2021-10-28	2021-11-05	8	ADIG21	Heat-stressed	8	0	8
A. digitifera	2021-10-28	2021-11-05	8	ADIG22	Heat-stressed	8	0	8
A. digitifera	2021-10-28	2021-11-05	8	ADIG23	Heat-stressed	8	0	8
A. digitifera	2021-10-28	2021-11-05	8	ADIG24	Heat-stressed	8	0	8
A. digitifera	2021-10-28	2021-11-05	8	ADIG25	Heat-stressed	8	0	8
A. digitifera	2021-10-28	2021-11-05	8	ADIG26	Heat-stressed	8	0	8
A. digitifera	2021-10-28	2021-11-05	8	ADIG27	Heat-stressed	8	0	8
A. digitifera	2021-10-28	2021-11-05	8	ADIG28	Heat-stressed	8	0	8
A. digitifera	2021-10-28	2021-11-05	8	ADIG29	Heat-stressed	8	0	8
A. digitifera	2021-10-28	2021-11-05	8	ADIG30	Heat-stressed	8	0	8
A. digitifera	2021-10-28	2021-11-05	8	ADIG31	Heat-stressed	8	0	8
A. digitifera	2021-10-28	2021-11-05	8	ADIG32	Heat-stressed	8	0	8
A. digitifera	2021-10-28	2021-11-05	8	ADIG33	Heat-stressed	8	0	8
A. digitifera	2021-10-28	2021-11-05	8	ADIG34	Heat-stressed	8	0	8
A. digitifera	2021-10-28	2021-11-05	8	ADIG35	Heat-stressed	8	0	8
A. digitifera	2021-10-28	2021-11-05	8	ADIG36	Heat-stressed	8	0	8
A. digitifera	2021-10-28	2021-11-05	8	ADIG37	Heat-stressed	8	0	8
A. digitifera	2021-10-28	2021-11-05	8	ADIG38	Heat-stressed	8	0	8
A. digitifera	2021-10-28	2021-11-05	8	ADIG39	Heat-stressed	8	0	8
A. digitifera	2021-10-28	2021-11-05	8	ADIG40	Heat-stressed	8	0	8
A. digitifera	2021-10-28	2021-11-06	9	ADIG01	Control	8	0	8
A. digitifera	2021-10-28	2021-11-06	9	ADIG02	Control	8	0	8
A. digitifera	2021-10-28	2021-11-06	9	ADIG03	Control	8	0	8
A. digitifera	2021-10-28	2021-11-06	9	ADIG04	Control	8	0	8
A. digitifera	2021-10-28	2021-11-06	9	ADIG05	Control	8	0	8
A. digitifera	2021-10-28	2021-11-06	9	ADIG06	Control	8	0	8
A. digitifera	2021-10-28	2021-11-06	9	ADIG07	Control	7	0	7
A. digitifera	2021-10-28	2021-11-06	9	ADIG08	Control	8	0	8
A. digitifera	2021-10-28	2021-11-06	9	ADIG09	Control	7	0	7
A. digitifera	2021-10-28	2021-11-06	9	ADIG10	Control	8	0	8
A. digitifera	2021-10-28	2021-11-06	9	ADIG11	Control	8	0	8
A. digitifera	2021-10-28	2021-11-06	9	ADIG12	Control	8	0	8
A. digitifera	2021-10-28	2021-11-06	9	ADIG13	Control	8	0	8
A. digitifera	2021-10-28	2021-11-06	9	ADIG14	Control	8	0	8
A. digitifera	2021-10-28	2021-11-06	9	ADIG15	Control	8	0	8
A. digitifera	2021-10-28	2021-11-06	9	ADIG16	Control	8	0	8
A. digitifera	2021-10-28	2021-11-06	9	ADIG17	Control	8	0	8
A. digitifera	2021-10-28	2021-11-06	9	ADIG18	Control	8	0	8
A. digitifera	2021-10-28	2021-11-06	9	ADIG19	Control	8	0	8
A. digitifera	2021-10-28	2021-11-06	9	ADIG20	Control	8	0	8
A. digitifera	2021-10-28	2021-11-06	9	ADIG21	Control	8	0	8
A. digitifera	2021-10-28	2021-11-06	9	ADIG22	Control	8	0	8
A. digitifera	2021-10-28	2021-11-06	9	ADIG23	Control	8	0	8
A. digitifera	2021-10-28	2021-11-06	9	ADIG24	Control	8	0	8
A. digitifera	2021-10-28	2021-11-06	9	ADIG25	Control	8	0	8
A. digitifera	2021-10-28	2021-11-06	9	ADIG26	Control	8	0	8
A. digitifera	2021-10-28	2021-11-06	9	ADIG27	Control	8	0	8
A. digitifera	2021-10-28	2021-11-06	9	ADIG28	Control	8	0	8
A. digitifera	2021-10-28	2021-11-06	9	ADIG29	Control	8	0	8
A. digitifera	2021-10-28	2021-11-06	9	ADIG30	Control	8	0	8
A. digitifera	2021-10-28	2021-11-06	9	ADIG31	Control	8	0	8
A. digitifera	2021-10-28	2021-11-06	9	ADIG32	Control	8	0	8
A. digitifera	2021-10-28	2021-11-06	9	ADIG33	Control	8	0	8
A. digitifera	2021-10-28	2021-11-06	9	ADIG34	Control	8	0	8
A. digitifera	2021-10-28	2021-11-06	9	ADIG35	Control	8	0	8
A. digitifera	2021-10-28	2021-11-06	9	ADIG36	Control	8	0	8
A. digitifera	2021-10-28	2021-11-06	9	ADIG37	Control	8	0	8
A. digitifera	2021-10-28	2021-11-06	9	ADIG38	Control	8	0	8
A. digitifera	2021-10-28	2021-11-06	9	ADIG39	Control	8	0	8
A. digitifera	2021-10-28	2021-11-06	9	ADIG40	Control	8	0	8
A. digitifera	2021-10-28	2021-11-06	9	ADIG01	Heat-stressed	8	0	8
A. digitifera	2021-10-28	2021-11-06	9	ADIG02	Heat-stressed	8	0	8
A. digitifera	2021-10-28	2021-11-06	9	ADIG03	Heat-stressed	8	0	8
A. digitifera	2021-10-28	2021-11-06	9	ADIG04	Heat-stressed	7	0	7
A. digitifera	2021-10-28	2021-11-06	9	ADIG05	Heat-stressed	8	0	8
A. digitifera	2021-10-28	2021-11-06	9	ADIG06	Heat-stressed	8	0	8
A. digitifera	2021-10-28	2021-11-06	9	ADIG07	Heat-stressed	7	0	7
A. digitifera	2021-10-28	2021-11-06	9	ADIG08	Heat-stressed	8	0	8
A. digitifera	2021-10-28	2021-11-06	9	ADIG09	Heat-stressed	8	0	8
A. digitifera	2021-10-28	2021-11-06	9	ADIG10	Heat-stressed	8	0	8
A. digitifera	2021-10-28	2021-11-06	9	ADIG11	Heat-stressed	8	0	8
A. digitifera	2021-10-28	2021-11-06	9	ADIG12	Heat-stressed	8	0	8
A. digitifera	2021-10-28	2021-11-06	9	ADIG13	Heat-stressed	8	0	8
A. digitifera	2021-10-28	2021-11-06	9	ADIG14	Heat-stressed	8	0	8
A. digitifera	2021-10-28	2021-11-06	9	ADIG15	Heat-stressed	8	0	8
A. digitifera	2021-10-28	2021-11-06	9	ADIG16	Heat-stressed	8	0	8
A. digitifera	2021-10-28	2021-11-06	9	ADIG17	Heat-stressed	8	0	8
A. digitifera	2021-10-28	2021-11-06	9	ADIG18	Heat-stressed	8	0	8
A. digitifera	2021-10-28	2021-11-06	9	ADIG19	Heat-stressed	8	0	8
A. digitifera	2021-10-28	2021-11-06	9	ADIG20	Heat-stressed	8	0	8
A. digitifera	2021-10-28	2021-11-06	9	ADIG21	Heat-stressed	8	0	8
A. digitifera	2021-10-28	2021-11-06	9	ADIG22	Heat-stressed	8	0	8
A. digitifera	2021-10-28	2021-11-06	9	ADIG23	Heat-stressed	8	0	8
A. digitifera	2021-10-28	2021-11-06	9	ADIG24	Heat-stressed	8	0	8
A. digitifera	2021-10-28	2021-11-06	9	ADIG25	Heat-stressed	8	0	8
A. digitifera	2021-10-28	2021-11-06	9	ADIG26	Heat-stressed	8	0	8
A. digitifera	2021-10-28	2021-11-06	9	ADIG27	Heat-stressed	8	0	8
A. digitifera	2021-10-28	2021-11-06	9	ADIG28	Heat-stressed	8	0	8
A. digitifera	2021-10-28	2021-11-06	9	ADIG29	Heat-stressed	8	0	8
A. digitifera	2021-10-28	2021-11-06	9	ADIG30	Heat-stressed	8	0	8
A. digitifera	2021-10-28	2021-11-06	9	ADIG31	Heat-stressed	8	0	8
A. digitifera	2021-10-28	2021-11-06	9	ADIG32	Heat-stressed	8	0	8
A. digitifera	2021-10-28	2021-11-06	9	ADIG33	Heat-stressed	8	0	8
A. digitifera	2021-10-28	2021-11-06	9	ADIG34	Heat-stressed	8	0	8
A. digitifera	2021-10-28	2021-11-06	9	ADIG35	Heat-stressed	8	0	8
A. digitifera	2021-10-28	2021-11-06	9	ADIG36	Heat-stressed	8	0	8
A. digitifera	2021-10-28	2021-11-06	9	ADIG37	Heat-stressed	8	0	8
A. digitifera	2021-10-28	2021-11-06	9	ADIG38	Heat-stressed	8	0	8
A. digitifera	2021-10-28	2021-11-06	9	ADIG39	Heat-stressed	8	0	8
A. digitifera	2021-10-28	2021-11-06	9	ADIG40	Heat-stressed	8	0	8
A. digitifera	2021-10-28	2021-11-07	10	ADIG01	Control	8	0	8
A. digitifera	2021-10-28	2021-11-07	10	ADIG02	Control	8	0	8
A. digitifera	2021-10-28	2021-11-07	10	ADIG03	Control	8	0	8
A. digitifera	2021-10-28	2021-11-07	10	ADIG04	Control	8	0	8
A. digitifera	2021-10-28	2021-11-07	10	ADIG05	Control	8	0	8
A. digitifera	2021-10-28	2021-11-07	10	ADIG06	Control	8	0	8
A. digitifera	2021-10-28	2021-11-07	10	ADIG07	Control	7	0	7
A. digitifera	2021-10-28	2021-11-07	10	ADIG08	Control	8	0	8
A. digitifera	2021-10-28	2021-11-07	10	ADIG09	Control	7	0	7
A. digitifera	2021-10-28	2021-11-07	10	ADIG10	Control	8	0	8
A. digitifera	2021-10-28	2021-11-07	10	ADIG11	Control	8	0	8
A. digitifera	2021-10-28	2021-11-07	10	ADIG12	Control	8	0	8
A. digitifera	2021-10-28	2021-11-07	10	ADIG13	Control	8	0	8
A. digitifera	2021-10-28	2021-11-07	10	ADIG14	Control	8	0	8
A. digitifera	2021-10-28	2021-11-07	10	ADIG15	Control	8	0	8
A. digitifera	2021-10-28	2021-11-07	10	ADIG16	Control	8	0	8
A. digitifera	2021-10-28	2021-11-07	10	ADIG17	Control	8	0	8
A. digitifera	2021-10-28	2021-11-07	10	ADIG18	Control	8	0	8
A. digitifera	2021-10-28	2021-11-07	10	ADIG19	Control	8	0	8
A. digitifera	2021-10-28	2021-11-07	10	ADIG20	Control	8	0	8
A. digitifera	2021-10-28	2021-11-07	10	ADIG21	Control	8	0	8
A. digitifera	2021-10-28	2021-11-07	10	ADIG22	Control	8	0	8
A. digitifera	2021-10-28	2021-11-07	10	ADIG23	Control	8	0	8
A. digitifera	2021-10-28	2021-11-07	10	ADIG24	Control	8	0	8
A. digitifera	2021-10-28	2021-11-07	10	ADIG25	Control	8	0	8
A. digitifera	2021-10-28	2021-11-07	10	ADIG26	Control	8	0	8
A. digitifera	2021-10-28	2021-11-07	10	ADIG27	Control	8	0	8
A. digitifera	2021-10-28	2021-11-07	10	ADIG28	Control	8	0	8
A. digitifera	2021-10-28	2021-11-07	10	ADIG29	Control	8	0	8
A. digitifera	2021-10-28	2021-11-07	10	ADIG30	Control	8	0	8
A. digitifera	2021-10-28	2021-11-07	10	ADIG31	Control	8	0	8
A. digitifera	2021-10-28	2021-11-07	10	ADIG32	Control	8	0	8
A. digitifera	2021-10-28	2021-11-07	10	ADIG33	Control	8	0	8
A. digitifera	2021-10-28	2021-11-07	10	ADIG34	Control	8	0	8
A. digitifera	2021-10-28	2021-11-07	10	ADIG35	Control	8	0	8
A. digitifera	2021-10-28	2021-11-07	10	ADIG36	Control	8	0	8
A. digitifera	2021-10-28	2021-11-07	10	ADIG37	Control	8	0	8
A. digitifera	2021-10-28	2021-11-07	10	ADIG38	Control	8	0	8
A. digitifera	2021-10-28	2021-11-07	10	ADIG39	Control	8	0	8
A. digitifera	2021-10-28	2021-11-07	10	ADIG40	Control	8	0	8
A. digitifera	2021-10-28	2021-11-07	10	ADIG01	Heat-stressed	8	0	8
A. digitifera	2021-10-28	2021-11-07	10	ADIG02	Heat-stressed	8	0	8
A. digitifera	2021-10-28	2021-11-07	10	ADIG03	Heat-stressed	8	0	8
A. digitifera	2021-10-28	2021-11-07	10	ADIG04	Heat-stressed	7	0	7
A. digitifera	2021-10-28	2021-11-07	10	ADIG05	Heat-stressed	8	0	8
A. digitifera	2021-10-28	2021-11-07	10	ADIG06	Heat-stressed	8	0	8
A. digitifera	2021-10-28	2021-11-07	10	ADIG07	Heat-stressed	7	0	7
A. digitifera	2021-10-28	2021-11-07	10	ADIG08	Heat-stressed	8	0	8
A. digitifera	2021-10-28	2021-11-07	10	ADIG09	Heat-stressed	8	0	8
A. digitifera	2021-10-28	2021-11-07	10	ADIG10	Heat-stressed	8	0	8
A. digitifera	2021-10-28	2021-11-07	10	ADIG11	Heat-stressed	8	0	8
A. digitifera	2021-10-28	2021-11-07	10	ADIG12	Heat-stressed	8	0	8
A. digitifera	2021-10-28	2021-11-07	10	ADIG13	Heat-stressed	8	0	8
A. digitifera	2021-10-28	2021-11-07	10	ADIG14	Heat-stressed	8	0	8
A. digitifera	2021-10-28	2021-11-07	10	ADIG15	Heat-stressed	8	0	8
A. digitifera	2021-10-28	2021-11-07	10	ADIG16	Heat-stressed	8	0	8
A. digitifera	2021-10-28	2021-11-07	10	ADIG17	Heat-stressed	8	0	8
A. digitifera	2021-10-28	2021-11-07	10	ADIG18	Heat-stressed	8	0	8
A. digitifera	2021-10-28	2021-11-07	10	ADIG19	Heat-stressed	8	1	7
A. digitifera	2021-10-28	2021-11-07	10	ADIG20	Heat-stressed	8	0	8
A. digitifera	2021-10-28	2021-11-07	10	ADIG21	Heat-stressed	8	0	8
A. digitifera	2021-10-28	2021-11-07	10	ADIG22	Heat-stressed	8	0	8
A. digitifera	2021-10-28	2021-11-07	10	ADIG23	Heat-stressed	8	0	8
A. digitifera	2021-10-28	2021-11-07	10	ADIG24	Heat-stressed	8	0	8
A. digitifera	2021-10-28	2021-11-07	10	ADIG25	Heat-stressed	8	0	8
A. digitifera	2021-10-28	2021-11-07	10	ADIG26	Heat-stressed	8	0	8
A. digitifera	2021-10-28	2021-11-07	10	ADIG27	Heat-stressed	8	0	8
A. digitifera	2021-10-28	2021-11-07	10	ADIG28	Heat-stressed	8	0	8
A. digitifera	2021-10-28	2021-11-07	10	ADIG29	Heat-stressed	8	0	8
A. digitifera	2021-10-28	2021-11-07	10	ADIG30	Heat-stressed	8	0	8
A. digitifera	2021-10-28	2021-11-07	10	ADIG31	Heat-stressed	8	0	8
A. digitifera	2021-10-28	2021-11-07	10	ADIG32	Heat-stressed	8	0	8
A. digitifera	2021-10-28	2021-11-07	10	ADIG33	Heat-stressed	8	0	8
A. digitifera	2021-10-28	2021-11-07	10	ADIG34	Heat-stressed	8	0	8
A. digitifera	2021-10-28	2021-11-07	10	ADIG35	Heat-stressed	8	0	8
A. digitifera	2021-10-28	2021-11-07	10	ADIG36	Heat-stressed	8	0	8
A. digitifera	2021-10-28	2021-11-07	10	ADIG37	Heat-stressed	8	0	8
A. digitifera	2021-10-28	2021-11-07	10	ADIG38	Heat-stressed	8	0	8
A. digitifera	2021-10-28	2021-11-07	10	ADIG39	Heat-stressed	8	0	8
A. digitifera	2021-10-28	2021-11-07	10	ADIG40	Heat-stressed	8	0	8
A. digitifera	2021-10-28	2021-11-08	11	ADIG01	Control	8	0	8
A. digitifera	2021-10-28	2021-11-08	11	ADIG02	Control	8	0	8
A. digitifera	2021-10-28	2021-11-08	11	ADIG03	Control	8	0	8
A. digitifera	2021-10-28	2021-11-08	11	ADIG04	Control	8	0	8
A. digitifera	2021-10-28	2021-11-08	11	ADIG05	Control	8	0	8
A. digitifera	2021-10-28	2021-11-08	11	ADIG06	Control	8	0	8
A. digitifera	2021-10-28	2021-11-08	11	ADIG07	Control	7	0	7
A. digitifera	2021-10-28	2021-11-08	11	ADIG08	Control	8	0	8
A. digitifera	2021-10-28	2021-11-08	11	ADIG09	Control	7	0	7
A. digitifera	2021-10-28	2021-11-08	11	ADIG10	Control	8	0	8
A. digitifera	2021-10-28	2021-11-08	11	ADIG11	Control	8	0	8
A. digitifera	2021-10-28	2021-11-08	11	ADIG12	Control	8	0	8
A. digitifera	2021-10-28	2021-11-08	11	ADIG13	Control	8	0	8
A. digitifera	2021-10-28	2021-11-08	11	ADIG14	Control	8	0	8
A. digitifera	2021-10-28	2021-11-08	11	ADIG15	Control	8	0	8
A. digitifera	2021-10-28	2021-11-08	11	ADIG16	Control	8	0	8
A. digitifera	2021-10-28	2021-11-08	11	ADIG17	Control	8	0	8
A. digitifera	2021-10-28	2021-11-08	11	ADIG18	Control	8	0	8
A. digitifera	2021-10-28	2021-11-08	11	ADIG19	Control	8	0	8
A. digitifera	2021-10-28	2021-11-08	11	ADIG20	Control	8	0	8
A. digitifera	2021-10-28	2021-11-08	11	ADIG21	Control	8	0	8
A. digitifera	2021-10-28	2021-11-08	11	ADIG22	Control	8	0	8
A. digitifera	2021-10-28	2021-11-08	11	ADIG23	Control	8	0	8
A. digitifera	2021-10-28	2021-11-08	11	ADIG24	Control	8	0	8
A. digitifera	2021-10-28	2021-11-08	11	ADIG25	Control	8	0	8
A. digitifera	2021-10-28	2021-11-08	11	ADIG26	Control	8	0	8
A. digitifera	2021-10-28	2021-11-08	11	ADIG27	Control	8	0	8
A. digitifera	2021-10-28	2021-11-08	11	ADIG28	Control	8	0	8
A. digitifera	2021-10-28	2021-11-08	11	ADIG29	Control	8	0	8
A. digitifera	2021-10-28	2021-11-08	11	ADIG30	Control	8	0	8
A. digitifera	2021-10-28	2021-11-08	11	ADIG31	Control	8	0	8
A. digitifera	2021-10-28	2021-11-08	11	ADIG32	Control	8	0	8
A. digitifera	2021-10-28	2021-11-08	11	ADIG33	Control	8	0	8
A. digitifera	2021-10-28	2021-11-08	11	ADIG34	Control	8	0	8
A. digitifera	2021-10-28	2021-11-08	11	ADIG35	Control	8	0	8
A. digitifera	2021-10-28	2021-11-08	11	ADIG36	Control	8	0	8
A. digitifera	2021-10-28	2021-11-08	11	ADIG37	Control	8	0	8
A. digitifera	2021-10-28	2021-11-08	11	ADIG38	Control	8	0	8
A. digitifera	2021-10-28	2021-11-08	11	ADIG39	Control	8	0	8
A. digitifera	2021-10-28	2021-11-08	11	ADIG40	Control	8	0	8
A. digitifera	2021-10-28	2021-11-08	11	ADIG01	Heat-stressed	8	0	8
A. digitifera	2021-10-28	2021-11-08	11	ADIG02	Heat-stressed	8	0	8
A. digitifera	2021-10-28	2021-11-08	11	ADIG03	Heat-stressed	8	0	8
A. digitifera	2021-10-28	2021-11-08	11	ADIG04	Heat-stressed	7	0	7
A. digitifera	2021-10-28	2021-11-08	11	ADIG05	Heat-stressed	8	2	6
A. digitifera	2021-10-28	2021-11-08	11	ADIG06	Heat-stressed	8	0	8
A. digitifera	2021-10-28	2021-11-08	11	ADIG07	Heat-stressed	7	3	4
A. digitifera	2021-10-28	2021-11-08	11	ADIG08	Heat-stressed	8	0	8
A. digitifera	2021-10-28	2021-11-08	11	ADIG09	Heat-stressed	8	1	7
A. digitifera	2021-10-28	2021-11-08	11	ADIG10	Heat-stressed	8	0	8
A. digitifera	2021-10-28	2021-11-08	11	ADIG11	Heat-stressed	8	0	8
A. digitifera	2021-10-28	2021-11-08	11	ADIG12	Heat-stressed	8	0	8
A. digitifera	2021-10-28	2021-11-08	11	ADIG13	Heat-stressed	8	0	8
A. digitifera	2021-10-28	2021-11-08	11	ADIG14	Heat-stressed	8	0	8
A. digitifera	2021-10-28	2021-11-08	11	ADIG15	Heat-stressed	8	0	8
A. digitifera	2021-10-28	2021-11-08	11	ADIG16	Heat-stressed	8	0	8
A. digitifera	2021-10-28	2021-11-08	11	ADIG17	Heat-stressed	8	0	8
A. digitifera	2021-10-28	2021-11-08	11	ADIG18	Heat-stressed	8	0	8
A. digitifera	2021-10-28	2021-11-08	11	ADIG19	Heat-stressed	8	1	7
A. digitifera	2021-10-28	2021-11-08	11	ADIG20	Heat-stressed	8	0	8
A. digitifera	2021-10-28	2021-11-08	11	ADIG21	Heat-stressed	8	0	8
A. digitifera	2021-10-28	2021-11-08	11	ADIG22	Heat-stressed	8	1	7
A. digitifera	2021-10-28	2021-11-08	11	ADIG23	Heat-stressed	8	0	8
A. digitifera	2021-10-28	2021-11-08	11	ADIG24	Heat-stressed	8	0	8
A. digitifera	2021-10-28	2021-11-08	11	ADIG25	Heat-stressed	8	0	8
A. digitifera	2021-10-28	2021-11-08	11	ADIG26	Heat-stressed	8	0	8
A. digitifera	2021-10-28	2021-11-08	11	ADIG27	Heat-stressed	8	1	7
A. digitifera	2021-10-28	2021-11-08	11	ADIG28	Heat-stressed	8	0	8
A. digitifera	2021-10-28	2021-11-08	11	ADIG29	Heat-stressed	8	0	8
A. digitifera	2021-10-28	2021-11-08	11	ADIG30	Heat-stressed	8	0	8
A. digitifera	2021-10-28	2021-11-08	11	ADIG31	Heat-stressed	8	0	8
A. digitifera	2021-10-28	2021-11-08	11	ADIG32	Heat-stressed	8	0	8
A. digitifera	2021-10-28	2021-11-08	11	ADIG33	Heat-stressed	8	0	8
A. digitifera	2021-10-28	2021-11-08	11	ADIG34	Heat-stressed	8	0	8
A. digitifera	2021-10-28	2021-11-08	11	ADIG35	Heat-stressed	8	0	8
A. digitifera	2021-10-28	2021-11-08	11	ADIG36	Heat-stressed	8	0	8
A. digitifera	2021-10-28	2021-11-08	11	ADIG37	Heat-stressed	8	0	8
A. digitifera	2021-10-28	2021-11-08	11	ADIG38	Heat-stressed	8	0	8
A. digitifera	2021-10-28	2021-11-08	11	ADIG39	Heat-stressed	8	0	8
A. digitifera	2021-10-28	2021-11-08	11	ADIG40	Heat-stressed	8	0	8
A. digitifera	2021-10-28	2021-11-09	12	ADIG01	Control	8	0	8
A. digitifera	2021-10-28	2021-11-09	12	ADIG02	Control	8	0	8
A. digitifera	2021-10-28	2021-11-09	12	ADIG03	Control	8	0	8
A. digitifera	2021-10-28	2021-11-09	12	ADIG04	Control	8	0	8
A. digitifera	2021-10-28	2021-11-09	12	ADIG05	Control	8	0	8
A. digitifera	2021-10-28	2021-11-09	12	ADIG06	Control	8	0	8
A. digitifera	2021-10-28	2021-11-09	12	ADIG07	Control	7	0	7
A. digitifera	2021-10-28	2021-11-09	12	ADIG08	Control	8	0	8
A. digitifera	2021-10-28	2021-11-09	12	ADIG09	Control	7	0	7
A. digitifera	2021-10-28	2021-11-09	12	ADIG10	Control	8	0	8
A. digitifera	2021-10-28	2021-11-09	12	ADIG11	Control	8	0	8
A. digitifera	2021-10-28	2021-11-09	12	ADIG12	Control	8	0	8
A. digitifera	2021-10-28	2021-11-09	12	ADIG13	Control	8	0	8
A. digitifera	2021-10-28	2021-11-09	12	ADIG14	Control	8	0	8
A. digitifera	2021-10-28	2021-11-09	12	ADIG15	Control	8	0	8
A. digitifera	2021-10-28	2021-11-09	12	ADIG16	Control	8	0	8
A. digitifera	2021-10-28	2021-11-09	12	ADIG17	Control	8	0	8
A. digitifera	2021-10-28	2021-11-09	12	ADIG18	Control	8	0	8
A. digitifera	2021-10-28	2021-11-09	12	ADIG19	Control	8	0	8
A. digitifera	2021-10-28	2021-11-09	12	ADIG20	Control	8	0	8
A. digitifera	2021-10-28	2021-11-09	12	ADIG21	Control	8	0	8
A. digitifera	2021-10-28	2021-11-09	12	ADIG22	Control	8	0	8
A. digitifera	2021-10-28	2021-11-09	12	ADIG23	Control	8	0	8
A. digitifera	2021-10-28	2021-11-09	12	ADIG24	Control	8	0	8
A. digitifera	2021-10-28	2021-11-09	12	ADIG25	Control	8	0	8
A. digitifera	2021-10-28	2021-11-09	12	ADIG26	Control	8	0	8
A. digitifera	2021-10-28	2021-11-09	12	ADIG27	Control	8	0	8
A. digitifera	2021-10-28	2021-11-09	12	ADIG28	Control	8	0	8
A. digitifera	2021-10-28	2021-11-09	12	ADIG29	Control	8	0	8
A. digitifera	2021-10-28	2021-11-09	12	ADIG30	Control	8	0	8
A. digitifera	2021-10-28	2021-11-09	12	ADIG31	Control	8	0	8
A. digitifera	2021-10-28	2021-11-09	12	ADIG32	Control	8	0	8
A. digitifera	2021-10-28	2021-11-09	12	ADIG33	Control	8	0	8
A. digitifera	2021-10-28	2021-11-09	12	ADIG34	Control	8	0	8
A. digitifera	2021-10-28	2021-11-09	12	ADIG35	Control	8	0	8
A. digitifera	2021-10-28	2021-11-09	12	ADIG36	Control	8	0	8
A. digitifera	2021-10-28	2021-11-09	12	ADIG37	Control	8	0	8
A. digitifera	2021-10-28	2021-11-09	12	ADIG38	Control	8	0	8
A. digitifera	2021-10-28	2021-11-09	12	ADIG39	Control	8	0	8
A. digitifera	2021-10-28	2021-11-09	12	ADIG40	Control	8	0	8
A. digitifera	2021-10-28	2021-11-09	12	ADIG01	Heat-stressed	8	2	6
A. digitifera	2021-10-28	2021-11-09	12	ADIG02	Heat-stressed	8	0	8
A. digitifera	2021-10-28	2021-11-09	12	ADIG03	Heat-stressed	8	0	8
A. digitifera	2021-10-28	2021-11-09	12	ADIG04	Heat-stressed	7	0	7
A. digitifera	2021-10-28	2021-11-09	12	ADIG05	Heat-stressed	8	2	6
A. digitifera	2021-10-28	2021-11-09	12	ADIG06	Heat-stressed	8	0	8
A. digitifera	2021-10-28	2021-11-09	12	ADIG07	Heat-stressed	7	6	1
A. digitifera	2021-10-28	2021-11-09	12	ADIG08	Heat-stressed	8	0	8
A. digitifera	2021-10-28	2021-11-09	12	ADIG09	Heat-stressed	8	0	8
A. digitifera	2021-10-28	2021-11-09	12	ADIG10	Heat-stressed	8	2	6
A. digitifera	2021-10-28	2021-11-09	12	ADIG11	Heat-stressed	8	1	7
A. digitifera	2021-10-28	2021-11-09	12	ADIG12	Heat-stressed	8	1	7
A. digitifera	2021-10-28	2021-11-09	12	ADIG13	Heat-stressed	8	0	8
A. digitifera	2021-10-28	2021-11-09	12	ADIG14	Heat-stressed	8	0	8
A. digitifera	2021-10-28	2021-11-09	12	ADIG15	Heat-stressed	8	0	8
A. digitifera	2021-10-28	2021-11-09	12	ADIG16	Heat-stressed	8	0	8
A. digitifera	2021-10-28	2021-11-09	12	ADIG17	Heat-stressed	8	0	8
A. digitifera	2021-10-28	2021-11-09	12	ADIG18	Heat-stressed	8	0	8
A. digitifera	2021-10-28	2021-11-09	12	ADIG19	Heat-stressed	8	1	7
A. digitifera	2021-10-28	2021-11-09	12	ADIG20	Heat-stressed	8	0	8
A. digitifera	2021-10-28	2021-11-09	12	ADIG21	Heat-stressed	8	0	8
A. digitifera	2021-10-28	2021-11-09	12	ADIG22	Heat-stressed	8	1	7
A. digitifera	2021-10-28	2021-11-09	12	ADIG23	Heat-stressed	8	0	8
A. digitifera	2021-10-28	2021-11-09	12	ADIG24	Heat-stressed	8	0	8
A. digitifera	2021-10-28	2021-11-09	12	ADIG25	Heat-stressed	8	0	8
A. digitifera	2021-10-28	2021-11-09	12	ADIG26	Heat-stressed	8	0	8
A. digitifera	2021-10-28	2021-11-09	12	ADIG27	Heat-stressed	8	2	6
A. digitifera	2021-10-28	2021-11-09	12	ADIG28	Heat-stressed	8	0	8
A. digitifera	2021-10-28	2021-11-09	12	ADIG29	Heat-stressed	8	0	8
A. digitifera	2021-10-28	2021-11-09	12	ADIG30	Heat-stressed	8	0	8
A. digitifera	2021-10-28	2021-11-09	12	ADIG31	Heat-stressed	8	0	8
A. digitifera	2021-10-28	2021-11-09	12	ADIG32	Heat-stressed	8	0	8
A. digitifera	2021-10-28	2021-11-09	12	ADIG33	Heat-stressed	8	0	8
A. digitifera	2021-10-28	2021-11-09	12	ADIG34	Heat-stressed	8	0	8
A. digitifera	2021-10-28	2021-11-09	12	ADIG35	Heat-stressed	8	0	8
A. digitifera	2021-10-28	2021-11-09	12	ADIG36	Heat-stressed	8	0	8
A. digitifera	2021-10-28	2021-11-09	12	ADIG37	Heat-stressed	8	0	8
A. digitifera	2021-10-28	2021-11-09	12	ADIG38	Heat-stressed	8	1	7
A. digitifera	2021-10-28	2021-11-09	12	ADIG39	Heat-stressed	8	0	8
A. digitifera	2021-10-28	2021-11-09	12	ADIG40	Heat-stressed	8	0	8
A. digitifera	2021-10-28	2021-11-10	13	ADIG01	Control	8	0	8
A. digitifera	2021-10-28	2021-11-10	13	ADIG02	Control	8	0	8
A. digitifera	2021-10-28	2021-11-10	13	ADIG03	Control	8	0	8
A. digitifera	2021-10-28	2021-11-10	13	ADIG04	Control	8	0	8
A. digitifera	2021-10-28	2021-11-10	13	ADIG05	Control	8	0	8
A. digitifera	2021-10-28	2021-11-10	13	ADIG06	Control	8	0	8
A. digitifera	2021-10-28	2021-11-10	13	ADIG07	Control	7	0	7
A. digitifera	2021-10-28	2021-11-10	13	ADIG08	Control	8	0	8
A. digitifera	2021-10-28	2021-11-10	13	ADIG09	Control	7	0	7
A. digitifera	2021-10-28	2021-11-10	13	ADIG10	Control	8	0	8
A. digitifera	2021-10-28	2021-11-10	13	ADIG11	Control	8	0	8
A. digitifera	2021-10-28	2021-11-10	13	ADIG12	Control	8	0	8
A. digitifera	2021-10-28	2021-11-10	13	ADIG13	Control	8	0	8
A. digitifera	2021-10-28	2021-11-10	13	ADIG14	Control	8	0	8
A. digitifera	2021-10-28	2021-11-10	13	ADIG15	Control	8	0	8
A. digitifera	2021-10-28	2021-11-10	13	ADIG16	Control	8	0	8
A. digitifera	2021-10-28	2021-11-10	13	ADIG17	Control	8	0	8
A. digitifera	2021-10-28	2021-11-10	13	ADIG18	Control	8	0	8
A. digitifera	2021-10-28	2021-11-10	13	ADIG19	Control	8	0	8
A. digitifera	2021-10-28	2021-11-10	13	ADIG20	Control	8	0	8
A. digitifera	2021-10-28	2021-11-10	13	ADIG21	Control	8	0	8
A. digitifera	2021-10-28	2021-11-10	13	ADIG22	Control	8	0	8
A. digitifera	2021-10-28	2021-11-10	13	ADIG23	Control	8	0	8
A. digitifera	2021-10-28	2021-11-10	13	ADIG24	Control	8	0	8
A. digitifera	2021-10-28	2021-11-10	13	ADIG25	Control	8	0	8
A. digitifera	2021-10-28	2021-11-10	13	ADIG26	Control	8	0	8
A. digitifera	2021-10-28	2021-11-10	13	ADIG27	Control	8	0	8
A. digitifera	2021-10-28	2021-11-10	13	ADIG28	Control	8	0	8
A. digitifera	2021-10-28	2021-11-10	13	ADIG29	Control	8	0	8
A. digitifera	2021-10-28	2021-11-10	13	ADIG30	Control	8	0	8
A. digitifera	2021-10-28	2021-11-10	13	ADIG31	Control	8	0	8
A. digitifera	2021-10-28	2021-11-10	13	ADIG32	Control	8	0	8
A. digitifera	2021-10-28	2021-11-10	13	ADIG33	Control	8	0	8
A. digitifera	2021-10-28	2021-11-10	13	ADIG34	Control	8	0	8
A. digitifera	2021-10-28	2021-11-10	13	ADIG35	Control	8	0	8
A. digitifera	2021-10-28	2021-11-10	13	ADIG36	Control	8	0	8
A. digitifera	2021-10-28	2021-11-10	13	ADIG37	Control	8	0	8
A. digitifera	2021-10-28	2021-11-10	13	ADIG38	Control	8	0	8
A. digitifera	2021-10-28	2021-11-10	13	ADIG39	Control	8	0	8
A. digitifera	2021-10-28	2021-11-10	13	ADIG40	Control	8	0	8
A. digitifera	2021-10-28	2021-11-10	13	ADIG01	Heat-stressed	8	2	6
A. digitifera	2021-10-28	2021-11-10	13	ADIG02	Heat-stressed	8	0	8
A. digitifera	2021-10-28	2021-11-10	13	ADIG03	Heat-stressed	8	1	7
A. digitifera	2021-10-28	2021-11-10	13	ADIG04	Heat-stressed	7	0	7
A. digitifera	2021-10-28	2021-11-10	13	ADIG05	Heat-stressed	8	3	5
A. digitifera	2021-10-28	2021-11-10	13	ADIG06	Heat-stressed	8	0	8
A. digitifera	2021-10-28	2021-11-10	13	ADIG07	Heat-stressed	7	7	0
A. digitifera	2021-10-28	2021-11-10	13	ADIG08	Heat-stressed	8	0	8
A. digitifera	2021-10-28	2021-11-10	13	ADIG09	Heat-stressed	8	0	8
A. digitifera	2021-10-28	2021-11-10	13	ADIG10	Heat-stressed	8	3	5
A. digitifera	2021-10-28	2021-11-10	13	ADIG11	Heat-stressed	8	2	6
A. digitifera	2021-10-28	2021-11-10	13	ADIG12	Heat-stressed	8	2	6
A. digitifera	2021-10-28	2021-11-10	13	ADIG13	Heat-stressed	8	0	8
A. digitifera	2021-10-28	2021-11-10	13	ADIG14	Heat-stressed	8	0	8
A. digitifera	2021-10-28	2021-11-10	13	ADIG15	Heat-stressed	8	0	8
A. digitifera	2021-10-28	2021-11-10	13	ADIG16	Heat-stressed	8	0	8
A. digitifera	2021-10-28	2021-11-10	13	ADIG17	Heat-stressed	8	1	7
A. digitifera	2021-10-28	2021-11-10	13	ADIG18	Heat-stressed	8	0	8
A. digitifera	2021-10-28	2021-11-10	13	ADIG19	Heat-stressed	8	5	3
A. digitifera	2021-10-28	2021-11-10	13	ADIG20	Heat-stressed	8	0	8
A. digitifera	2021-10-28	2021-11-10	13	ADIG21	Heat-stressed	8	0	8
A. digitifera	2021-10-28	2021-11-10	13	ADIG22	Heat-stressed	8	1	7
A. digitifera	2021-10-28	2021-11-10	13	ADIG23	Heat-stressed	8	4	4
A. digitifera	2021-10-28	2021-11-10	13	ADIG24	Heat-stressed	8	0	8
A. digitifera	2021-10-28	2021-11-10	13	ADIG25	Heat-stressed	8	0	8
A. digitifera	2021-10-28	2021-11-10	13	ADIG26	Heat-stressed	8	0	8
A. digitifera	2021-10-28	2021-11-10	13	ADIG27	Heat-stressed	8	4	4
A. digitifera	2021-10-28	2021-11-10	13	ADIG28	Heat-stressed	8	0	8
A. digitifera	2021-10-28	2021-11-10	13	ADIG29	Heat-stressed	8	0	8
A. digitifera	2021-10-28	2021-11-10	13	ADIG30	Heat-stressed	8	0	8
A. digitifera	2021-10-28	2021-11-10	13	ADIG31	Heat-stressed	8	0	8
A. digitifera	2021-10-28	2021-11-10	13	ADIG32	Heat-stressed	8	0	8
A. digitifera	2021-10-28	2021-11-10	13	ADIG33	Heat-stressed	8	0	8
A. digitifera	2021-10-28	2021-11-10	13	ADIG34	Heat-stressed	8	0	8
A. digitifera	2021-10-28	2021-11-10	13	ADIG35	Heat-stressed	8	0	8
A. digitifera	2021-10-28	2021-11-10	13	ADIG36	Heat-stressed	8	0	8
A. digitifera	2021-10-28	2021-11-10	13	ADIG37	Heat-stressed	8	0	8
A. digitifera	2021-10-28	2021-11-10	13	ADIG38	Heat-stressed	8	1	7
A. digitifera	2021-10-28	2021-11-10	13	ADIG39	Heat-stressed	8	0	8
A. digitifera	2021-10-28	2021-11-10	13	ADIG40	Heat-stressed	8	0	8
A. millepora	2021-10-06	2021-10-06	0	AMIL01	Control	8	0	8
A. millepora	2021-10-06	2021-10-06	0	AMIL02	Control	8	0	8
A. millepora	2021-10-06	2021-10-06	0	AMIL03	Control	8	0	8
A. millepora	2021-10-06	2021-10-06	0	AMIL04	Control	8	0	8
A. millepora	2021-10-06	2021-10-06	0	AMIL05	Control	8	0	8
A. millepora	2021-10-06	2021-10-06	0	AMIL06	Control	8	0	8
A. millepora	2021-10-06	2021-10-06	0	AMIL07	Control	8	0	8
A. millepora	2021-10-06	2021-10-06	0	AMIL08	Control	8	0	8
A. millepora	2021-10-06	2021-10-06	0	AMIL09	Control	8	0	8
A. millepora	2021-10-06	2021-10-06	0	AMIL10	Control	8	0	8
A. millepora	2021-10-06	2021-10-06	0	AMIL11	Control	8	0	8
A. millepora	2021-10-06	2021-10-06	0	AMIL12	Control	8	0	8
A. millepora	2021-10-06	2021-10-06	0	AMIL13	Control	8	0	8
A. millepora	2021-10-06	2021-10-06	0	AMIL14	Control	8	0	8
A. millepora	2021-10-06	2021-10-06	0	AMIL15	Control	8	0	8
A. millepora	2021-10-06	2021-10-06	0	AMIL16	Control	8	0	8
A. millepora	2021-10-06	2021-10-06	0	AMIL17	Control	8	0	8
A. millepora	2021-10-06	2021-10-06	0	AMIL18	Control	8	0	8
A. millepora	2021-10-06	2021-10-06	0	AMIL19	Control	8	0	8
A. millepora	2021-10-06	2021-10-06	0	AMIL20	Control	8	0	8
A. millepora	2021-10-06	2021-10-06	0	AMIL21	Control	8	0	8
A. millepora	2021-10-06	2021-10-06	0	AMIL22	Control	8	0	8
A. millepora	2021-10-06	2021-10-06	0	AMIL23	Control	8	0	8
A. millepora	2021-10-06	2021-10-06	0	AMIL24	Control	8	0	8
A. millepora	2021-10-06	2021-10-06	0	AMIL25	Control	8	0	8
A. millepora	2021-10-06	2021-10-06	0	AMIL26	Control	8	0	8
A. millepora	2021-10-06	2021-10-06	0	AMIL27	Control	8	0	8
A. millepora	2021-10-06	2021-10-06	0	AMIL28	Control	8	0	8
A. millepora	2021-10-06	2021-10-06	0	AMIL29	Control	8	0	8
A. millepora	2021-10-06	2021-10-06	0	AMIL30	Control	8	0	8
A. millepora	2021-10-06	2021-10-06	0	AMIL01	Heat-stressed	8	0	8
A. millepora	2021-10-06	2021-10-06	0	AMIL02	Heat-stressed	8	0	8
A. millepora	2021-10-06	2021-10-06	0	AMIL03	Heat-stressed	8	0	8
A. millepora	2021-10-06	2021-10-06	0	AMIL04	Heat-stressed	8	0	8
A. millepora	2021-10-06	2021-10-06	0	AMIL05	Heat-stressed	8	0	8
A. millepora	2021-10-06	2021-10-06	0	AMIL06	Heat-stressed	8	0	8
A. millepora	2021-10-06	2021-10-06	0	AMIL07	Heat-stressed	8	0	8
A. millepora	2021-10-06	2021-10-06	0	AMIL08	Heat-stressed	8	0	8
A. millepora	2021-10-06	2021-10-06	0	AMIL09	Heat-stressed	8	0	8
A. millepora	2021-10-06	2021-10-06	0	AMIL10	Heat-stressed	8	0	8
A. millepora	2021-10-06	2021-10-06	0	AMIL11	Heat-stressed	8	0	8
A. millepora	2021-10-06	2021-10-06	0	AMIL12	Heat-stressed	8	0	8
A. millepora	2021-10-06	2021-10-06	0	AMIL13	Heat-stressed	8	0	8
A. millepora	2021-10-06	2021-10-06	0	AMIL14	Heat-stressed	8	0	8
A. millepora	2021-10-06	2021-10-06	0	AMIL15	Heat-stressed	8	0	8
A. millepora	2021-10-06	2021-10-06	0	AMIL16	Heat-stressed	8	0	8
A. millepora	2021-10-06	2021-10-06	0	AMIL17	Heat-stressed	8	0	8
A. millepora	2021-10-06	2021-10-06	0	AMIL18	Heat-stressed	8	0	8
A. millepora	2021-10-06	2021-10-06	0	AMIL19	Heat-stressed	8	0	8
A. millepora	2021-10-06	2021-10-06	0	AMIL20	Heat-stressed	8	0	8
A. millepora	2021-10-06	2021-10-06	0	AMIL21	Heat-stressed	8	0	8
A. millepora	2021-10-06	2021-10-06	0	AMIL22	Heat-stressed	8	0	8
A. millepora	2021-10-06	2021-10-06	0	AMIL23	Heat-stressed	8	0	8
A. millepora	2021-10-06	2021-10-06	0	AMIL24	Heat-stressed	8	0	8
A. millepora	2021-10-06	2021-10-06	0	AMIL25	Heat-stressed	8	0	8
A. millepora	2021-10-06	2021-10-06	0	AMIL26	Heat-stressed	8	0	8
A. millepora	2021-10-06	2021-10-06	0	AMIL27	Heat-stressed	8	0	8
A. millepora	2021-10-06	2021-10-06	0	AMIL28	Heat-stressed	8	0	8
A. millepora	2021-10-06	2021-10-06	0	AMIL29	Heat-stressed	8	0	8
A. millepora	2021-10-06	2021-10-06	0	AMIL30	Heat-stressed	8	0	8
A. millepora	2021-10-06	2021-10-07	1	AMIL01	Control	8	0	8
A. millepora	2021-10-06	2021-10-07	1	AMIL02	Control	8	0	8
A. millepora	2021-10-06	2021-10-07	1	AMIL03	Control	8	0	8
A. millepora	2021-10-06	2021-10-07	1	AMIL04	Control	8	0	8
A. millepora	2021-10-06	2021-10-07	1	AMIL05	Control	8	0	8
A. millepora	2021-10-06	2021-10-07	1	AMIL06	Control	8	0	8
A. millepora	2021-10-06	2021-10-07	1	AMIL07	Control	8	0	8
A. millepora	2021-10-06	2021-10-07	1	AMIL08	Control	8	0	8
A. millepora	2021-10-06	2021-10-07	1	AMIL09	Control	8	0	8
A. millepora	2021-10-06	2021-10-07	1	AMIL10	Control	8	0	8
A. millepora	2021-10-06	2021-10-07	1	AMIL11	Control	8	0	8
A. millepora	2021-10-06	2021-10-07	1	AMIL12	Control	8	0	8
A. millepora	2021-10-06	2021-10-07	1	AMIL13	Control	8	0	8
A. millepora	2021-10-06	2021-10-07	1	AMIL14	Control	8	0	8
A. millepora	2021-10-06	2021-10-07	1	AMIL15	Control	8	0	8
A. millepora	2021-10-06	2021-10-07	1	AMIL16	Control	8	0	8
A. millepora	2021-10-06	2021-10-07	1	AMIL17	Control	8	0	8
A. millepora	2021-10-06	2021-10-07	1	AMIL18	Control	8	0	8
A. millepora	2021-10-06	2021-10-07	1	AMIL19	Control	8	0	8
A. millepora	2021-10-06	2021-10-07	1	AMIL20	Control	8	0	8
A. millepora	2021-10-06	2021-10-07	1	AMIL21	Control	8	0	8
A. millepora	2021-10-06	2021-10-07	1	AMIL22	Control	8	0	8
A. millepora	2021-10-06	2021-10-07	1	AMIL23	Control	8	0	8
A. millepora	2021-10-06	2021-10-07	1	AMIL24	Control	8	0	8
A. millepora	2021-10-06	2021-10-07	1	AMIL25	Control	8	0	8
A. millepora	2021-10-06	2021-10-07	1	AMIL26	Control	8	0	8
A. millepora	2021-10-06	2021-10-07	1	AMIL27	Control	8	0	8
A. millepora	2021-10-06	2021-10-07	1	AMIL28	Control	8	0	8
A. millepora	2021-10-06	2021-10-07	1	AMIL29	Control	8	0	8
A. millepora	2021-10-06	2021-10-07	1	AMIL30	Control	8	0	8
A. millepora	2021-10-06	2021-10-07	1	AMIL01	Heat-stressed	8	0	8
A. millepora	2021-10-06	2021-10-07	1	AMIL02	Heat-stressed	8	0	8
A. millepora	2021-10-06	2021-10-07	1	AMIL03	Heat-stressed	8	0	8
A. millepora	2021-10-06	2021-10-07	1	AMIL04	Heat-stressed	8	0	8
A. millepora	2021-10-06	2021-10-07	1	AMIL05	Heat-stressed	8	0	8
A. millepora	2021-10-06	2021-10-07	1	AMIL06	Heat-stressed	8	0	8
A. millepora	2021-10-06	2021-10-07	1	AMIL07	Heat-stressed	8	0	8
A. millepora	2021-10-06	2021-10-07	1	AMIL08	Heat-stressed	8	0	8
A. millepora	2021-10-06	2021-10-07	1	AMIL09	Heat-stressed	8	0	8
A. millepora	2021-10-06	2021-10-07	1	AMIL10	Heat-stressed	8	0	8
A. millepora	2021-10-06	2021-10-07	1	AMIL11	Heat-stressed	8	0	8
A. millepora	2021-10-06	2021-10-07	1	AMIL12	Heat-stressed	8	0	8
A. millepora	2021-10-06	2021-10-07	1	AMIL13	Heat-stressed	8	0	8
A. millepora	2021-10-06	2021-10-07	1	AMIL14	Heat-stressed	8	0	8
A. millepora	2021-10-06	2021-10-07	1	AMIL15	Heat-stressed	8	0	8
A. millepora	2021-10-06	2021-10-07	1	AMIL16	Heat-stressed	8	0	8
A. millepora	2021-10-06	2021-10-07	1	AMIL17	Heat-stressed	8	0	8
A. millepora	2021-10-06	2021-10-07	1	AMIL18	Heat-stressed	8	0	8
A. millepora	2021-10-06	2021-10-07	1	AMIL19	Heat-stressed	8	0	8
A. millepora	2021-10-06	2021-10-07	1	AMIL20	Heat-stressed	8	0	8
A. millepora	2021-10-06	2021-10-07	1	AMIL21	Heat-stressed	8	0	8
A. millepora	2021-10-06	2021-10-07	1	AMIL22	Heat-stressed	8	0	8
A. millepora	2021-10-06	2021-10-07	1	AMIL23	Heat-stressed	8	0	8
A. millepora	2021-10-06	2021-10-07	1	AMIL24	Heat-stressed	8	0	8
A. millepora	2021-10-06	2021-10-07	1	AMIL25	Heat-stressed	8	0	8
A. millepora	2021-10-06	2021-10-07	1	AMIL26	Heat-stressed	8	0	8
A. millepora	2021-10-06	2021-10-07	1	AMIL27	Heat-stressed	8	0	8
A. millepora	2021-10-06	2021-10-07	1	AMIL28	Heat-stressed	8	0	8
A. millepora	2021-10-06	2021-10-07	1	AMIL29	Heat-stressed	8	0	8
A. millepora	2021-10-06	2021-10-07	1	AMIL30	Heat-stressed	8	0	8
A. millepora	2021-10-06	2021-10-08	2	AMIL01	Control	8	0	8
A. millepora	2021-10-06	2021-10-08	2	AMIL02	Control	8	0	8
A. millepora	2021-10-06	2021-10-08	2	AMIL03	Control	8	0	8
A. millepora	2021-10-06	2021-10-08	2	AMIL04	Control	8	0	8
A. millepora	2021-10-06	2021-10-08	2	AMIL05	Control	8	0	8
A. millepora	2021-10-06	2021-10-08	2	AMIL06	Control	8	0	8
A. millepora	2021-10-06	2021-10-08	2	AMIL07	Control	8	0	8
A. millepora	2021-10-06	2021-10-08	2	AMIL08	Control	8	0	8
A. millepora	2021-10-06	2021-10-08	2	AMIL09	Control	8	0	8
A. millepora	2021-10-06	2021-10-08	2	AMIL10	Control	8	0	8
A. millepora	2021-10-06	2021-10-08	2	AMIL11	Control	8	0	8
A. millepora	2021-10-06	2021-10-08	2	AMIL12	Control	8	0	8
A. millepora	2021-10-06	2021-10-08	2	AMIL13	Control	8	0	8
A. millepora	2021-10-06	2021-10-08	2	AMIL14	Control	8	0	8
A. millepora	2021-10-06	2021-10-08	2	AMIL15	Control	8	0	8
A. millepora	2021-10-06	2021-10-08	2	AMIL16	Control	8	0	8
A. millepora	2021-10-06	2021-10-08	2	AMIL17	Control	8	0	8
A. millepora	2021-10-06	2021-10-08	2	AMIL18	Control	8	0	8
A. millepora	2021-10-06	2021-10-08	2	AMIL19	Control	8	0	8
A. millepora	2021-10-06	2021-10-08	2	AMIL20	Control	8	0	8
A. millepora	2021-10-06	2021-10-08	2	AMIL21	Control	8	0	8
A. millepora	2021-10-06	2021-10-08	2	AMIL22	Control	8	0	8
A. millepora	2021-10-06	2021-10-08	2	AMIL23	Control	8	0	8
A. millepora	2021-10-06	2021-10-08	2	AMIL24	Control	8	0	8
A. millepora	2021-10-06	2021-10-08	2	AMIL25	Control	8	0	8
A. millepora	2021-10-06	2021-10-08	2	AMIL26	Control	8	0	8
A. millepora	2021-10-06	2021-10-08	2	AMIL27	Control	8	0	8
A. millepora	2021-10-06	2021-10-08	2	AMIL28	Control	8	0	8
A. millepora	2021-10-06	2021-10-08	2	AMIL29	Control	8	0	8
A. millepora	2021-10-06	2021-10-08	2	AMIL30	Control	8	0	8
A. millepora	2021-10-06	2021-10-08	2	AMIL01	Heat-stressed	8	0	8
A. millepora	2021-10-06	2021-10-08	2	AMIL02	Heat-stressed	8	0	8
A. millepora	2021-10-06	2021-10-08	2	AMIL03	Heat-stressed	8	0	8
A. millepora	2021-10-06	2021-10-08	2	AMIL04	Heat-stressed	8	0	8
A. millepora	2021-10-06	2021-10-08	2	AMIL05	Heat-stressed	8	0	8
A. millepora	2021-10-06	2021-10-08	2	AMIL06	Heat-stressed	8	0	8
A. millepora	2021-10-06	2021-10-08	2	AMIL07	Heat-stressed	8	0	8
A. millepora	2021-10-06	2021-10-08	2	AMIL08	Heat-stressed	8	0	8
A. millepora	2021-10-06	2021-10-08	2	AMIL09	Heat-stressed	8	0	8
A. millepora	2021-10-06	2021-10-08	2	AMIL10	Heat-stressed	8	0	8
A. millepora	2021-10-06	2021-10-08	2	AMIL11	Heat-stressed	8	0	8
A. millepora	2021-10-06	2021-10-08	2	AMIL12	Heat-stressed	8	0	8
A. millepora	2021-10-06	2021-10-08	2	AMIL13	Heat-stressed	8	0	8
A. millepora	2021-10-06	2021-10-08	2	AMIL14	Heat-stressed	8	0	8
A. millepora	2021-10-06	2021-10-08	2	AMIL15	Heat-stressed	8	0	8
A. millepora	2021-10-06	2021-10-08	2	AMIL16	Heat-stressed	8	0	8
A. millepora	2021-10-06	2021-10-08	2	AMIL17	Heat-stressed	8	0	8
A. millepora	2021-10-06	2021-10-08	2	AMIL18	Heat-stressed	8	0	8
A. millepora	2021-10-06	2021-10-08	2	AMIL19	Heat-stressed	8	0	8
A. millepora	2021-10-06	2021-10-08	2	AMIL20	Heat-stressed	8	0	8
A. millepora	2021-10-06	2021-10-08	2	AMIL21	Heat-stressed	8	0	8
A. millepora	2021-10-06	2021-10-08	2	AMIL22	Heat-stressed	8	0	8
A. millepora	2021-10-06	2021-10-08	2	AMIL23	Heat-stressed	8	0	8
A. millepora	2021-10-06	2021-10-08	2	AMIL24	Heat-stressed	8	0	8
A. millepora	2021-10-06	2021-10-08	2	AMIL25	Heat-stressed	8	0	8
A. millepora	2021-10-06	2021-10-08	2	AMIL26	Heat-stressed	8	0	8
A. millepora	2021-10-06	2021-10-08	2	AMIL27	Heat-stressed	8	0	8
A. millepora	2021-10-06	2021-10-08	2	AMIL28	Heat-stressed	8	0	8
A. millepora	2021-10-06	2021-10-08	2	AMIL29	Heat-stressed	8	0	8
A. millepora	2021-10-06	2021-10-08	2	AMIL30	Heat-stressed	8	0	8
A. millepora	2021-10-06	2021-10-09	3	AMIL01	Control	8	0	8
A. millepora	2021-10-06	2021-10-09	3	AMIL02	Control	8	0	8
A. millepora	2021-10-06	2021-10-09	3	AMIL03	Control	8	0	8
A. millepora	2021-10-06	2021-10-09	3	AMIL04	Control	8	0	8
A. millepora	2021-10-06	2021-10-09	3	AMIL05	Control	8	0	8
A. millepora	2021-10-06	2021-10-09	3	AMIL06	Control	8	0	8
A. millepora	2021-10-06	2021-10-09	3	AMIL07	Control	8	0	8
A. millepora	2021-10-06	2021-10-09	3	AMIL08	Control	8	0	8
A. millepora	2021-10-06	2021-10-09	3	AMIL09	Control	8	0	8
A. millepora	2021-10-06	2021-10-09	3	AMIL10	Control	8	0	8
A. millepora	2021-10-06	2021-10-09	3	AMIL11	Control	8	0	8
A. millepora	2021-10-06	2021-10-09	3	AMIL12	Control	8	0	8
A. millepora	2021-10-06	2021-10-09	3	AMIL13	Control	8	0	8
A. millepora	2021-10-06	2021-10-09	3	AMIL14	Control	8	0	8
A. millepora	2021-10-06	2021-10-09	3	AMIL15	Control	8	0	8
A. millepora	2021-10-06	2021-10-09	3	AMIL16	Control	8	0	8
A. millepora	2021-10-06	2021-10-09	3	AMIL17	Control	8	0	8
A. millepora	2021-10-06	2021-10-09	3	AMIL18	Control	8	0	8
A. millepora	2021-10-06	2021-10-09	3	AMIL19	Control	8	0	8
A. millepora	2021-10-06	2021-10-09	3	AMIL20	Control	8	0	8
A. millepora	2021-10-06	2021-10-09	3	AMIL21	Control	8	0	8
A. millepora	2021-10-06	2021-10-09	3	AMIL22	Control	8	0	8
A. millepora	2021-10-06	2021-10-09	3	AMIL23	Control	8	0	8
A. millepora	2021-10-06	2021-10-09	3	AMIL24	Control	8	0	8
A. millepora	2021-10-06	2021-10-09	3	AMIL25	Control	8	0	8
A. millepora	2021-10-06	2021-10-09	3	AMIL26	Control	8	0	8
A. millepora	2021-10-06	2021-10-09	3	AMIL27	Control	8	0	8
A. millepora	2021-10-06	2021-10-09	3	AMIL28	Control	8	0	8
A. millepora	2021-10-06	2021-10-09	3	AMIL29	Control	8	0	8
A. millepora	2021-10-06	2021-10-09	3	AMIL30	Control	8	0	8
A. millepora	2021-10-06	2021-10-09	3	AMIL01	Heat-stressed	8	0	8
A. millepora	2021-10-06	2021-10-09	3	AMIL02	Heat-stressed	8	0	8
A. millepora	2021-10-06	2021-10-09	3	AMIL03	Heat-stressed	8	0	8
A. millepora	2021-10-06	2021-10-09	3	AMIL04	Heat-stressed	8	0	8
A. millepora	2021-10-06	2021-10-09	3	AMIL05	Heat-stressed	8	0	8
A. millepora	2021-10-06	2021-10-09	3	AMIL06	Heat-stressed	8	0	8
A. millepora	2021-10-06	2021-10-09	3	AMIL07	Heat-stressed	8	0	8
A. millepora	2021-10-06	2021-10-09	3	AMIL08	Heat-stressed	8	0	8
A. millepora	2021-10-06	2021-10-09	3	AMIL09	Heat-stressed	8	0	8
[truncated: 441 more rows]

## Sheet: TS04
Colony ID	Classification
ATEN07	Unclassified
ATEN08	Unclassified
ATEN24	Unclassified
ATEN25	Unclassified
ATEN09	Unclassified

## Sheet: TS05
Thermotolerance parameter	Group 1	Group 2	n1	n2	statistic	P-value	Q-value
IOMall	A. digitifera	A. millepora	40	30	4.05462	5.02168e-05	7.53253e-05
IOMall	A. digitifera	A. tenuis	40	25	4.38737	1.14728e-05	3.44184e-05
IOMall	A. millepora	A. tenuis	30	25	0.514334	0.607018	0.607018
%ΔCall	A. digitifera	A. millepora	40	30	6.23405	4.54535e-10	1.36361e-09
%ΔCall	A. digitifera	A. tenuis	40	25	3.929	8.53013e-05	0.000127952
%ΔCall	A. millepora	A. tenuis	30	25	-1.86101	0.0627426	0.0627426
CSIall	A. digitifera	A. millepora	40	30	6.05257	1.42553e-09	4.27658e-09
CSIall	A. digitifera	A. tenuis	40	25	5.06793	4.02169e-07	6.03254e-07
CSIall	A. millepora	A. tenuis	30	25	-0.626886	0.530734	0.530734

## Sheet: TS06
Species	Start of experiment	Date	Day elapsed	Colony	Treatment	N fragment	Bleached fragments	Healthy fragments	% fragments healthy	Proportion of fragments bleached, %	Ranking	Heat tolerance
A. digitifera	2021-10-28	2021-11-10	13	D02	Heat-stressed	8	0	8	100	0	1	High
A. digitifera	2021-10-28	2021-11-10	13	D04	Heat-stressed	7	0	7	100	0	2	High
A. digitifera	2021-10-28	2021-11-10	13	D06	Heat-stressed	8	0	8	100	0	3	High
A. digitifera	2021-10-28	2021-11-10	13	D08	Heat-stressed	8	0	8	100	0	4	High
A. digitifera	2021-10-28	2021-11-10	13	D09	Heat-stressed	8	0	8	100	0	5	High
A. digitifera	2021-10-28	2021-11-10	13	D13	Heat-stressed	8	0	8	100	0	6	High
A. digitifera	2021-10-28	2021-11-10	13	D14	Heat-stressed	8	0	8	100	0	7	High
A. digitifera	2021-10-28	2021-11-10	13	D15	Heat-stressed	8	0	8	100	0	8	High
A. digitifera	2021-10-28	2021-11-10	13	D16	Heat-stressed	8	0	8	100	0	9	High
A. digitifera	2021-10-28	2021-11-10	13	D18	Heat-stressed	8	0	8	100	0	10	High
A. digitifera	2021-10-28	2021-11-10	13	D20	Heat-stressed	8	0	8	100	0	11	High
A. digitifera	2021-10-28	2021-11-10	13	D21	Heat-stressed	8	0	8	100	0	12	High
A. digitifera	2021-10-28	2021-11-10	13	D24	Heat-stressed	8	0	8	100	0	13	High
A. digitifera	2021-10-28	2021-11-10	13	D25	Heat-stressed	8	0	8	100	0	14	High
A. digitifera	2021-10-28	2021-11-10	13	D26	Heat-stressed	8	0	8	100	0	15	High
A. digitifera	2021-10-28	2021-11-10	13	D28	Heat-stressed	8	0	8	100	0	16	High
A. digitifera	2021-10-28	2021-11-10	13	D29	Heat-stressed	8	0	8	100	0	17	High
A. digitifera	2021-10-28	2021-11-10	13	D30	Heat-stressed	8	0	8	100	0	18	High
A. digitifera	2021-10-28	2021-11-10	13	D31	Heat-stressed	8	0	8	100	0	19	High
A. digitifera	2021-10-28	2021-11-10	13	D32	Heat-stressed	8	0	8	100	0	20	High
A. digitifera	2021-10-28	2021-11-10	13	D33	Heat-stressed	8	0	8	100	0	21	High
A. digitifera	2021-10-28	2021-11-10	13	D34	Heat-stressed	8	0	8	100	0	22	High
A. digitifera	2021-10-28	2021-11-10	13	D35	Heat-stressed	8	0	8	100	0	23	High
A. digitifera	2021-10-28	2021-11-10	13	D36	Heat-stressed	8	0	8	100	0	24	High
A. digitifera	2021-10-28	2021-11-10	13	D37	Heat-stressed	8	0	8	100	0	25	High
A. digitifera	2021-10-28	2021-11-10	13	D39	Heat-stressed	8	0	8	100	0	26	High
A. digitifera	2021-10-28	2021-11-10	13	D40	Heat-stressed	8	0	8	100	0	27	High
A. digitifera	2021-10-28	2021-11-10	13	D03	Heat-stressed	8	1	7	87.5	12.5	28	High
A. digitifera	2021-10-28	2021-11-10	13	D17	Heat-stressed	8	1	7	87.5	12.5	29	High
A. digitifera	2021-10-28	2021-11-10	13	D22	Heat-stressed	8	1	7	87.5	12.5	30	High
A. digitifera	2021-10-28	2021-11-10	13	D38	Heat-stressed	8	1	7	87.5	12.5	31	High
A. digitifera	2021-10-28	2021-11-10	13	D01	Heat-stressed	8	2	6	75	25	32	High
A. digitifera	2021-10-28	2021-11-10	13	D11	Heat-stressed	8	2	6	75	25	33	High
A. digitifera	2021-10-28	2021-11-10	13	D12	Heat-stressed	8	2	6	75	25	34	High
A. digitifera	2021-10-28	2021-11-10	13	D05	Heat-stressed	8	3	5	62.5	37.5	35	High
A. digitifera	2021-10-28	2021-11-10	13	D10	Heat-stressed	8	3	5	62.5	37.5	36	High
A. digitifera	2021-10-28	2021-11-10	13	D23	Heat-stressed	8	4	4	50	50	37	Low
A. digitifera	2021-10-28	2021-11-10	13	D27	Heat-stressed	8	4	4	50	50	38	Low
A. digitifera	2021-10-28	2021-11-10	13	D19	Heat-stressed	8	5	3	37.5	62.5	39	Low
A. digitifera	2021-10-28	2021-11-10	13	D07	Heat-stressed	7	7	0	0	100	40	Low
A. millepora	2021-10-06	2021-10-16	10	M01	Heat-stressed	8	0	8	100	0	1	High
A. millepora	2021-10-06	2021-10-16	10	M03	Heat-stressed	8	0	8	100	0	2	High
A. millepora	2021-10-06	2021-10-16	10	M04	Heat-stressed	8	0	8	100	0	3	High
A. millepora	2021-10-06	2021-10-16	10	M08	Heat-stressed	8	0	8	100	0	4	High
A. millepora	2021-10-06	2021-10-16	10	M09	Heat-stressed	8	0	8	100	0	5	High
A. millepora	2021-10-06	2021-10-16	10	M14	Heat-stressed	8	0	8	100	0	6	High
A. millepora	2021-10-06	2021-10-16	10	M15	Heat-stressed	8	0	8	100	0	7	High
A. millepora	2021-10-06	2021-10-16	10	M16	Heat-stressed	8	0	8	100	0	8	High
A. millepora	2021-10-06	2021-10-16	10	M17	Heat-stressed	8	0	8	100	0	9	High
A. millepora	2021-10-06	2021-10-16	10	M18	Heat-stressed	8	0	8	100	0	10	High
A. millepora	2021-10-06	2021-10-16	10	M19	Heat-stressed	8	0	8	100	0	11	High
A. millepora	2021-10-06	2021-10-16	10	M21	Heat-stressed	8	0	8	100	0	12	High
A. millepora	2021-10-06	2021-10-16	10	M24	Heat-stressed	8	0	8	100	0	13	High
A. millepora	2021-10-06	2021-10-16	10	M26	Heat-stressed	8	0	8	100	0	14	High
A. millepora	2021-10-06	2021-10-16	10	M29	Heat-stressed	8	0	8	100	0	15	High
A. millepora	2021-10-06	2021-10-16	10	M02	Heat-stressed	8	1	7	87.5	12.5	16	High
A. millepora	2021-10-06	2021-10-16	10	M07	Heat-stressed	8	1	7	87.5	12.5	17	High
A. millepora	2021-10-06	2021-10-16	10	M13	Heat-stressed	8	1	7	87.5	12.5	18	High
A. millepora	2021-10-06	2021-10-16	10	M22	Heat-stressed	8	1	7	87.5	12.5	19	High
A. millepora	2021-10-06	2021-10-16	10	M28	Heat-stressed	8	1	7	87.5	12.5	20	High
A. millepora	2021-10-06	2021-10-16	10	M30	Heat-stressed	8	1	7	87.5	12.5	21	High
A. millepora	2021-10-06	2021-10-16	10	M25	Heat-stressed	8	2	6	75	25	22	High
A. millepora	2021-10-06	2021-10-16	10	M05	Heat-stressed	8	3	5	62.5	37.5	23	High
A. millepora	2021-10-06	2021-10-16	10	M06	Heat-stressed	8	3	5	62.5	37.5	24	High
A. millepora	2021-10-06	2021-10-16	10	M20	Heat-stressed	8	3	5	62.5	37.5	25	High
A. millepora	2021-10-06	2021-10-16	10	M23	Heat-stressed	8	3	5	62.5	37.5	26	High
A. millepora	2021-10-06	2021-10-16	10	M10	Heat-stressed	8	4	4	50	50	27	Low
A. millepora	2021-10-06	2021-10-16	10	M12	Heat-stressed	8	4	4	50	50	28	Low
A. millepora	2021-10-06	2021-10-16	10	M11	Heat-stressed	8	5	3	37.5	62.5	29	Low
A. millepora	2021-10-06	2021-10-16	10	M27	Heat-stressed	8	6	2	25	75	30	Low
A. tenuis	2021-11-14	2021-11-24	10	T03	Heat-stressed	8	0	8	100	0	1	High
A. tenuis	2021-11-14	2021-11-24	10	T05	Heat-stressed	8	0	8	100	0	2	High
A. tenuis	2021-11-14	2021-11-24	10	T13	Heat-stressed	8	0	8	100	0	3	High
A. tenuis	2021-11-14	2021-11-24	10	T14	Heat-stressed	8	0	8	100	0	4	High
A. tenuis	2021-11-14	2021-11-24	10	T18	Heat-stressed	8	0	8	100	0	5	High
A. tenuis	2021-11-14	2021-11-24	10	T19	Heat-stressed	7	0	7	100	0	6	High
A. tenuis	2021-11-14	2021-11-24	10	T20	Heat-stressed	8	0	8	100	0	7	High
A. tenuis	2021-11-14	2021-11-24	10	T21	Heat-stressed	7	0	7	100	0	8	High
A. tenuis	2021-11-14	2021-11-24	10	T22	Heat-stressed	8	0	8	100	0	9	High
A. tenuis	2021-11-14	2021-11-24	10	T28	Heat-stressed	8	0	8	100	0	10	High
A. tenuis	2021-11-14	2021-11-24	10	T29	Heat-stressed	8	0	8	100	0	11	High
A. tenuis	2021-11-14	2021-11-24	10	T30	Heat-stressed	8	0	8	100	0	12	High
A. tenuis	2021-11-14	2021-11-24	10	T10	Heat-stressed	8	1	7	87.5	12.5	13	High
A. tenuis	2021-11-14	2021-11-24	10	T17	Heat-stressed	8	1	7	87.5	12.5	14	High
A. tenuis	2021-11-14	2021-11-24	10	T26	Heat-stressed	8	1	7	87.5	12.5	15	High
A. tenuis	2021-11-14	2021-11-24	10	T16	Heat-stressed	8	2	6	75	25	16	High
A. tenuis	2021-11-14	2021-11-24	10	T02	Heat-stressed	8	3	5	62.5	37.5	17	High
A. tenuis	2021-11-14	2021-11-24	10	T11	Heat-stressed	8	3	5	62.5	37.5	18	High
A. tenuis	2021-11-14	2021-11-24	10	T27	Heat-stressed	8	3	5	62.5	37.5	19	High
A. tenuis	2021-11-14	2021-11-24	10	T06	Heat-stressed	8	4	4	50	50	20	Low
A. tenuis	2021-11-14	2021-11-24	10	T12	Heat-stressed	8	4	4	50	50	21	Low
A. tenuis	2021-11-14	2021-11-24	10	T15	Heat-stressed	8	7	1	12.5	87.5	22	Low
A. tenuis	2021-11-14	2021-11-24	10	T01	Heat-stressed	8	8	0	0	100	23	Low
A. tenuis	2021-11-14	2021-11-24	10	T04	Heat-stressed	8	8	0	0	100	24	Low
A. tenuis	2021-11-14	2021-11-24	10	T23	Heat-stressed	8	8	0	0	100	25	Low

## Sheet: TS07
Colony ID	% change	Species	Mean	Ranking	Heat tolerance
D02	-31.1842	A. digitifera	-41.2345	1	High
D29	-37.3133	A. digitifera	-39.6203	2	High
D15	-38.1058	A. digitifera	-39.1249	3	High
D40	-39.3226	A. digitifera	-38.6271	4	High
D13	-36.7166	A. digitifera	-38.0448	5	High
D35	-29.3091	A. digitifera	-38.0202	6	High
D08	-48.8185	A. digitifera	-37.8387	7	High
D06	-29.7526	A. digitifera	-35.4998	8	High
D20	-42.077	A. digitifera	-35.2044	9	Intermediate
D24	-51.7212	A. digitifera	-33.5926	10	Intermediate
D14	-37.1922	A. digitifera	-33.5433	11	Intermediate
D38	-31.1104	A. digitifera	-33.3527	12	Intermediate
D32	-25.7437	A. digitifera	-33.1819	13	Intermediate
D33	-42.7244	A. digitifera	-33.0045	14	Intermediate
D36	-41.5259	A. digitifera	-32.9684	15	Intermediate
D28	-38.3081	A. digitifera	-31.9968	16	Intermediate
D22	-33.9763	A. digitifera	-31.9769	17	Intermediate
D16	-10.1913	A. digitifera	-29.9554	18	Intermediate
D26	-38.0157	A. digitifera	-29.4798	19	Intermediate
D30	-8.66985	A. digitifera	-27.9249	20	Intermediate
D31	-17.9295	A. digitifera	-27.1189	21	Intermediate
D25	-40.4144	A. digitifera	-26.3459	22	Intermediate
D09	-22.7265	A. digitifera	-24.4029	23	Intermediate
D37	-26.064	A. digitifera	-24.0039	24	Intermediate
D39	-52.2738	A. digitifera	-23.511	25	Intermediate
D04	-26.0977	A. digitifera	-22.2943	26	Intermediate
D34	-25.5407	A. digitifera	-21.0002	27	Intermediate
D11	-20.562	A. digitifera	-16.4443	28	Intermediate
D21	-9.85463	A. digitifera	-15.8775	29	Intermediate
D18	-3.11891	A. digitifera	-13.3357	30	Intermediate
D03	-34.8049	A. digitifera	-12.7626	31	Intermediate
D05	-10.2479	A. digitifera	-4.84289	32	Intermediate
D17	1.87651	A. digitifera	-3.99469	33	Low
D27	-52.2454	A. digitifera	-0.982232	34	Low
D10	-32.8835	A. digitifera	-0.0940458	35	Low
D12	-34.5866	A. digitifera	2.72396	36	Low
D23	-16.8279	A. digitifera	6.69253	37	Low
D01	28.7157	A. digitifera	16.692	38	Low
D19	-39.2614	A. digitifera	17.5517	39	Low
D07	43.2936	A. digitifera	29.363	40	Low
M04	-26.7125	A. millepora	-23.4315	1	High
M09	-8.80927	A. millepora	-10.5967	2	High
M21	-12.4559	A. millepora	-9.82104	3	High
M03	-18.7622	A. millepora	-7.72806	4	High
M24	8.23217	A. millepora	-5.46049	5	High
M17	0.124809	A. millepora	-5.24359	6	High
M16	3.06218	A. millepora	-3.84825	7	Intermediate
M30	9.5281	A. millepora	-2.86733	8	Intermediate
M22	-11.1306	A. millepora	-1.19753	9	Intermediate
M13	-11.1835	A. millepora	1.23455	10	Intermediate
M07	-5.86553	A. millepora	1.30684	11	Intermediate
M01	32.2395	A. millepora	2.02109	12	Intermediate
M25	-10.8489	A. millepora	4.57615	13	Intermediate
M26	25.1799	A. millepora	5.25569	14	Intermediate
M18	19.7725	A. millepora	6.34599	15	Intermediate
M19	-0.73343	A. millepora	7.36664	16	Intermediate
M29	15.0963	A. millepora	7.38579	17	Intermediate
M02	21.3543	A. millepora	7.82735	18	Intermediate
M28	32.9794	A. millepora	11.4984	19	Intermediate
M15	81.8694	A. millepora	14.5301	20	Intermediate
M14	17.5491	A. millepora	18.4746	21	Intermediate
M08	120.579	A. millepora	31.8097	22	Intermediate
M20	10.0715	A. millepora	33.5838	23	Intermediate
M23	14.4399	A. millepora	34.6915	24	Intermediate
M10	-21.3736	A. millepora	34.967	25	Low
M06	9.0729	A. millepora	35.9637	26	Low
M05	33.7372	A. millepora	49.9905	27	Low
M12	68.2809	A. millepora	60.3383	28	Low
M11	-15.8593	A. millepora	105.104	29	Low
M27	79.3773	A. millepora	114.985	30	Low
T05	-18.3376	A. tenuis	-14.7807	1	High
T13	-31.9632	A. tenuis	-13.5619	2	High
T29	-12.9733	A. tenuis	-12.4227	3	High
T21	-9.83889	A. tenuis	-12.1922	4	High
T27	-11.7454	A. tenuis	-11.4138	5	High
T18	-20.306	A. tenuis	-11.3062	6	Intermediate
T28	-4.72845	A. tenuis	-9.18794	7	Intermediate
T03	-23.1717	A. tenuis	-9.08274	8	Intermediate
T14	-26.1598	A. tenuis	-8.85052	9	Intermediate
T30	-14.0817	A. tenuis	-8.00142	10	Intermediate
T12	-12.8395	A. tenuis	-7.1362	11	Intermediate
T19	-21.5657	A. tenuis	-4.26835	12	Intermediate
T17	-22.2234	A. tenuis	-4.25374	13	Intermediate
T26	-34.5906	A. tenuis	-3.80156	14	Intermediate
T20	-2.31769	A. tenuis	-3.27393	15	Intermediate
T16	-16.3896	A. tenuis	-1.70664	16	Intermediate
T06	-28.9321	A. tenuis	0.452764	17	Intermediate
T02	-24.2215	A. tenuis	0.736824	18	Intermediate
T10	4.59225	A. tenuis	3.07271	19	Intermediate
T22	-7.66703	A. tenuis	4.68433	20	Intermediate
T11	-10.3389	A. tenuis	16.0987	21	Low
T15	-3.73967	A. tenuis	30.4835	22	Low
T01	-21.2844	A. tenuis	35.1275	23	Low
T23	-15.6099	A. tenuis	36.4559	24	Low
T04	-9.83319	A. tenuis	39.7202	25	Low

## Sheet: TS08
Species	Colony	Proportion of fragments bleached, %	Mean	mor_norm	mig_norm	combined	Ranking	Heat tolerance
A. digitifera	D02	0	-41.2345	0	0	0	1	High
A. digitifera	D29	0	-39.6203	0	0.0228642	0.0228642	2	High
A. digitifera	D15	0	-39.1249	0	0.0298821	0.0298821	3	High
A. digitifera	D40	0	-38.6271	0	0.0369322	0.0369322	4	High
A. digitifera	D13	0	-38.0448	0	0.0451811	0.0451811	5	High
A. digitifera	D35	0	-38.0202	0	0.0455297	0.0455297	6	High
A. digitifera	D08	0	-37.8387	0	0.0481002	0.0481002	7	High
A. digitifera	D06	0	-35.4998	0	0.0812303	0.0812303	8	High
A. digitifera	D20	0	-35.2044	0	0.0854145	0.0854145	9	Intermediate
A. digitifera	D24	0	-33.5926	0	0.108246	0.108246	10	Intermediate
A. digitifera	D14	0	-33.5433	0	0.108943	0.108943	11	Intermediate
A. digitifera	D32	0	-33.1819	0	0.114063	0.114063	12	Intermediate
A. digitifera	D33	0	-33.0045	0	0.116576	0.116576	13	Intermediate
A. digitifera	D36	0	-32.9684	0	0.117088	0.117088	14	Intermediate
A. digitifera	D28	0	-31.9968	0	0.130849	0.130849	15	Intermediate
A. digitifera	D16	0	-29.9554	0	0.159765	0.159765	16	Intermediate
A. digitifera	D26	0	-29.4798	0	0.166503	0.166503	17	Intermediate
A. digitifera	D30	0	-27.9249	0	0.188527	0.188527	18	Intermediate
A. digitifera	D31	0	-27.1189	0	0.199945	0.199945	19	Intermediate
A. digitifera	D25	0	-26.3459	0	0.210893	0.210893	20	Intermediate
A. digitifera	D38	12.5	-33.3527	0.125	0.111643	0.236643	21	Intermediate
A. digitifera	D09	0	-24.4029	0	0.238416	0.238416	22	Intermediate
A. digitifera	D37	0	-24.0039	0	0.244068	0.244068	23	Intermediate
A. digitifera	D39	0	-23.511	0	0.251049	0.251049	24	Intermediate
A. digitifera	D22	12.5	-31.9769	0.125	0.131132	0.256132	25	Intermediate
A. digitifera	D04	0	-22.2943	0	0.268284	0.268284	26	Intermediate
A. digitifera	D34	0	-21.0002	0	0.286615	0.286615	27	Intermediate
A. digitifera	D21	0	-15.8775	0	0.359177	0.359177	28	Intermediate
A. digitifera	D18	0	-13.3357	0	0.39518	0.39518	29	Intermediate
A. digitifera	D03	12.5	-12.7626	0.125	0.403299	0.528299	30	Intermediate
A. digitifera	D11	25	-16.4443	0.25	0.351148	0.601148	31	Intermediate
A. digitifera	D17	12.5	-3.99469	0.125	0.527495	0.652495	32	Intermediate
A. digitifera	D12	25	2.72396	0.25	0.622663	0.872663	33	Low
A. digitifera	D05	37.5	-4.84289	0.375	0.51548	0.89048	34	Low
A. digitifera	D10	37.5	-0.0940458	0.375	0.582747	0.957747	35	Low
A. digitifera	D27	50	-0.982232	0.5	0.570166	1.07017	36	Low
A. digitifera	D01	25	16.692	0.25	0.820518	1.07052	37	Low
A. digitifera	D23	50	6.69253	0.5	0.678877	1.17888	38	Low
A. digitifera	D19	62.5	17.5517	0.625	0.832695	1.4577	39	Low
A. digitifera	D07	100	29.363	1	1	2	40	Low
A. millepora	M04	0	-23.4315	0	0	0	1	High
A. millepora	M09	0	-10.5967	0	0.0927255	0.0927255	2	High
A. millepora	M21	0	-9.82104	0	0.0983295	0.0983295	3	High
A. millepora	M03	0	-7.72806	0	0.11345	0.11345	4	High
A. millepora	M24	0	-5.46049	0	0.129833	0.129833	5	High
A. millepora	M17	0	-5.24359	0	0.1314	0.1314	6	High
A. millepora	M16	0	-3.84825	0	0.14148	0.14148	7	Intermediate
A. millepora	M01	0	2.02109	0	0.183884	0.183884	8	Intermediate
A. millepora	M26	0	5.25569	0	0.207253	0.207253	9	Intermediate
A. millepora	M18	0	6.34599	0	0.215129	0.215129	10	Intermediate
A. millepora	M19	0	7.36664	0	0.222503	0.222503	11	Intermediate
A. millepora	M29	0	7.38579	0	0.222642	0.222642	12	Intermediate
A. millepora	M15	0	14.5301	0	0.274256	0.274256	13	Intermediate
A. millepora	M14	0	18.4746	0	0.302753	0.302753	14	Intermediate
A. millepora	M30	12.5	-2.86733	0.166667	0.148567	0.315234	15	Intermediate
A. millepora	M22	12.5	-1.19753	0.166667	0.160631	0.327297	16	Intermediate
A. millepora	M13	12.5	1.23455	0.166667	0.178201	0.344868	17	Intermediate
A. millepora	M07	12.5	1.30684	0.166667	0.178724	0.34539	18	Intermediate
A. millepora	M02	12.5	7.82735	0.166667	0.225832	0.392498	19	Intermediate
A. millepora	M08	0	31.8097	0	0.399094	0.399094	20	Intermediate
A. millepora	M28	12.5	11.4984	0.166667	0.252353	0.41902	21	Intermediate
A. millepora	M25	25	4.57615	0.333333	0.202343	0.535676	22	Intermediate
A. millepora	M20	37.5	33.5838	0.5	0.411911	0.911911	23	Intermediate
A. millepora	M23	37.5	34.6915	0.5	0.419914	0.919914	24	Intermediate
A. millepora	M06	37.5	35.9637	0.5	0.429105	0.929105	25	Low
A. millepora	M05	37.5	49.9905	0.5	0.530442	1.03044	26	Low
A. millepora	M10	50	34.967	0.666667	0.421904	1.08857	27	Low
A. millepora	M12	50	60.3383	0.666667	0.605201	1.27187	28	Low
A. millepora	M11	62.5	105.104	0.833333	0.928616	1.76195	29	Low
A. millepora	M27	75	114.985	1	1	2	30	Low
A. tenuis	T05	0	-14.7807	0	0	0	1	High
A. tenuis	T13	0	-13.5619	0	0.0223623	0.0223623	2	High
A. tenuis	T29	0	-12.4227	0	0.0432646	0.0432646	3	High
A. tenuis	T21	0	-12.1922	0	0.0474941	0.0474941	4	High
A. tenuis	T18	0	-11.3062	0	0.0637515	0.0637515	5	High
A. tenuis	T28	0	-9.18794	0	0.102618	0.102618	6	Intermediate
A. tenuis	T03	0	-9.08274	0	0.104548	0.104548	7	Intermediate
A. tenuis	T14	0	-8.85052	0	0.108809	0.108809	8	Intermediate
A. tenuis	T30	0	-8.00142	0	0.124389	0.124389	9	Intermediate
A. tenuis	T19	0	-4.26835	0	0.192884	0.192884	10	Intermediate
A. tenuis	T20	0	-3.27393	0	0.21113	0.21113	11	Intermediate
A. tenuis	T17	12.5	-4.25374	0.125	0.193152	0.318152	12	Intermediate
A. tenuis	T26	12.5	-3.80156	0.125	0.201449	0.326449	13	Intermediate
A. tenuis	T22	0	4.68433	0	0.357151	0.357151	14	Intermediate
A. tenuis	T27	37.5	-11.4138	0.375	0.0617777	0.436778	15	Intermediate
A. tenuis	T10	12.5	3.07271	0.125	0.32758	0.45258	16	Intermediate
A. tenuis	T16	25	-1.70664	0.25	0.239887	0.489887	17	Intermediate
A. tenuis	T12	50	-7.1362	0.5	0.140264	0.640264	18	Intermediate
A. tenuis	T02	37.5	0.736824	0.375	0.284721	0.659721	19	Intermediate
A. tenuis	T06	50	0.452764	0.5	0.279509	0.779509	20	Intermediate
A. tenuis	T11	37.5	16.0987	0.375	0.566585	0.941585	21	Low
A. tenuis	T15	87.5	30.4835	0.875	0.830522	1.70552	22	Low
A. tenuis	T01	100	35.1275	1	0.915731	1.91573	23	Low
A. tenuis	T23	100	36.4559	1	0.940105	1.94011	24	Low
A. tenuis	T04	100	39.7202	1	1	2	25	Low

## Sheet: TS09
ITS2Sequence	Total	Genus
C3u	5642403	Cladocopium
C3	817303	Cladocopium
C3xu	738861	Cladocopium
C115	337127	Cladocopium
C21ab	70145	Cladocopium
C3xt	61818	Cladocopium
C3xv	50300	Cladocopium
22573_C	37880	Cladocopium
21841_C	27183	Cladocopium
C3ge	24418	Cladocopium
C3b	17816	Cladocopium
C3bn	12520	Cladocopium
21495_C	6820	Cladocopium
375675_C	6192	Cladocopium
101771_C	5877	Cladocopium
C115g	5267	Cladocopium
C115a	4966	Cladocopium
C3ro	3061	Cladocopium
C18a	2508	Cladocopium
103089_C	2137	Cladocopium
25878_C	2132	Cladocopium
3176982_C	2000	Cladocopium
C115e	1977	Cladocopium
C3kv	1836	Cladocopium
C3gj	1629	Cladocopium
376531_C	1395	Cladocopium
374292_C	784	Cladocopium
9772_C	700	Cladocopium
25305_C	440	Cladocopium
113196_C	410	Cladocopium
22875_C	396	Cladocopium
374365_C	336	Cladocopium
101112_C	325	Cladocopium
D1	126	Durusdinium
D1bj	23	Durusdinium
D2.2	9	Durusdinium
D1c	8	Durusdinium
D4	8	Durusdinium
2450882_D	5	Durusdinium
D17d	4	Durusdinium

[truncated: 6 more sheets: TS10, TS11, TS12, TS13, TS14, TS15]
